# Supplementary material for: Structural Diversity and Biological Activity of Cyanopeptolins Produced by Nostoc edaphicum CCNP1411
Source: MDPI journal article supplement (doi:10.3390/md21100508), 2023-09-26
Supplement: s1 [file s1]

# Supplementary Material: Structural diversity and biological activity of cyanopeptolins produced by *Nostoc edaphicum* CCNP1411

Robert Konkel <sup>1</sup>, Marta Ceglowska <sup>2</sup>, Karolina Szubert <sup>1</sup>, Ewa Wieczerzak <sup>3</sup>, Sofia Iliakopoulou <sup>4</sup>, Triantafyllos Kaloudis <sup>5,6</sup>, and Hanna Mazur-Marzec <sup>1,\*</sup>

<sup>1</sup> Department of Marine Biology and Biotechnology, Faculty of Oceanography and Geography, University of Gdańsk, Gdynia, Poland; [robert.konkel@phdstud.ug.edu.pl](mailto:robert.konkel@phdstud.ug.edu.pl); [karolina.szubert@phdstud.ug.edu.pl](mailto:karolina.szubert@phdstud.ug.edu.pl); [hanna.mazur-marzec@ug.edu.pl](mailto:hanna.mazur-marzec@ug.edu.pl)

<sup>2</sup> Institute of Oceanology, Polish Academy of Sciences, Powstańców Warszawy 55, PL-81712 Sopot, Poland; [mceglowska@iopan.pl](mailto:mceglowska@iopan.pl)

<sup>3</sup> Department of Biomedical Chemistry, Faculty of Chemistry, University of Gdańsk, Gdańsk, Poland; [ewa.wieczerzak@ug.edu.pl](mailto:ewa.wieczerzak@ug.edu.pl)

<sup>4</sup> Department of Sustainable Agriculture, University of Patras, Agrinio, Greece; [s.iliakopoulou@inn.demokritos.gr](mailto:s.iliakopoulou@inn.demokritos.gr)

<sup>5</sup> Institute of Nanoscience & Nanotechnology, NCSR Demokritos, Agia Paraskevi, Greece;

<sup>6</sup> Laboratory of Organic Micropollutants, Water Quality Control Department, EYDAP SA, Menidi, Athens, Greece; [kaloudis@eydap.gr](mailto:kaloudis@eydap.gr)

\* Correspondence: [hanna.mazur-marzec@ug.edu.pl](mailto:hanna.mazur-marzec@ug.edu.pl);

Table S1. Cyanopeptolin variants described so far.

| Name                | Mass  | Cyanobacterium                        | strain      | 1     | 2      | 3       | 4   | 5               | 6   | Side chain      | References |
|---------------------|-------|---------------------------------------|-------------|-------|--------|---------|-----|-----------------|-----|-----------------|------------|
| Tasipeptin B        | 770.5 | <i>Symploca</i>                       | NIH304      | O-Thr | Leu    | Ahp     | Leu | N-MePhe         | Val | BA              | [30]       |
| Micropeptin MZ771   | 771.5 | <i>Microcystis</i>                    | TAU IL-361  | O-Thr | Arg    | O-MeAhp | Ile | N-MePhe         | Ile |                 | [47]       |
| Micropeptin MM836   | 836.4 | <i>Microcystis</i>                    | TAU IL-36   | O-Thr | Leu    | Ahp     | Phe | N-MePhe         | Ile | GA              | [42]       |
|                     |       | <i>Oscillatoria/<br/>Planktothrix</i> |             |       |        |         |     |                 |     |                 |            |
| Planktopeptin BL843 | 843.4 | <i>rubescens</i>                      | <i>n.a.</i> | O-Thr | Leu    | Ahp     | Thr | N-MeTyr         | Ile | GA-gamma-lactam | [45]       |
| Micropeptin MZ845   | 845.5 | <i>Microcystis</i>                    | TAU IL-361  | O-Thr | Arg    | Ahp     | Ile | N-MePhe         | Ile | GA              | [47, 72]   |
| Micropeptin MM850   | 850.4 | <i>Microcystis</i>                    | TAU IL-36   | O-Thr | Leu    | Ahp     | Phe | N-MePhe         | Ile | GA              | [42]       |
| Micropeptin MZ859   | 859.5 | <i>Microcystis</i>                    | TAU IL-361  | O-Thr | Arg    | O-MeAhp | Ile | N-MePhe         | Ile | GA              | [47]       |
| Tasipeptin A        | 869.5 | <i>Symploca</i>                       | NIH304      | O-Thr | Leu    | Ahp     | Leu | N-MePhe         | Val | Val-BA          | [30]       |
|                     |       | <i>Oscillatoria/<br/>Planktothrix</i> |             |       |        |         |     |                 |     |                 |            |
| Cyanopeptolin 880   | 880.5 | <i>agardhii</i>                       | CYA 126/8   | O-Thr | Hty    | Ahp     | Ile | N-MePhe         | Ile | 2-O-MeGa        | [25]       |
|                     |       | <i>Microcystis</i>                    |             |       |        |         |     |                 |     |                 |            |
| Micropeptin 88A     | 883.5 | <i>aeruginosa</i>                     | NIES-88     | O-Thr | H4Tyr  | Ahp     | Val | N-MePhe         | Ile | Glu             | [63]       |
| Micropeptin HU895B  | 895.4 | <i>Microcystis</i>                    | TAU IL-342  | O-Thr | Arg    | Ahp     | Ile | N-MeTyr         | Ile | GA              | [73]       |
| Micropeptin HU895A  | 895.4 | <i>Microcystis</i>                    | TAU IL-342  | O-Thr | Arg    | Ahp     | Ile | N,O-diMe-Cl-Tyr | Val | GA              | [73]       |
|                     |       | <i>Dolabella</i>                      |             |       |        |         |     |                 |     |                 |            |
| Dolastatin 13       | 905.5 | <i>auricularia</i>                    | <i>n.a.</i> | O-Thr | Dhb    | Ahp     | Phe | N-MePhe         | Val | Val-O-Me_Ga     | [32]       |
| Micropeptin HU909   | 909.4 | <i>Microcystis</i>                    | TAU IL-342  | O-Thr | Arg    | O-MeAhp | Ile | N-Me-Cl-Tyr     | Val | GA              | [73]       |
| Micropeptin SF909   | 909.4 | <i>n.a.</i>                           | <i>n.a.</i> | O-Thr | Gln    | Ahp     | Leu | N-MeTyr         | Ile | Hpla            | [21, 74]   |
| Micropeptin LH911B  | 911.4 | <i>Microcystis</i>                    | TAU IL-37   | O-Thr | Arg    | Ahp     | Val | N-MePhe         | Ile | SuGA            | [75]       |
| Micropeptin LH911A  | 911.4 | <i>Microcystis</i>                    | TAU IL-37   | O-Thr | Arg    | Ahp     | Ile | N-MePhe         | Val | SuGA            | [72, 75]   |
| Cyanopeptolin 911   | 911.4 | <i>n.a.</i>                           | <i>n.a.</i> | O-Thr | Arg    | Ahp     | Leu | N-MeTyr         | Val | SuGA            | [76]       |
| Micropeptin LH911C  | 911.4 | <i>Microcystis</i>                    | TAU IL-37   | O-Thr | Me-Lys | Ahp     | Ile | N-MePhe         | Ile | SuGA            | [75]       |
| Micropeptin MM916   | 916.4 | <i>Microcystis</i>                    | TAU IL-36   | O-Thr | Leu    | Ahp     | Phe | N-MePhe         | Ile | SuGA            | [42]       |
| Somamide B          | 918.4 | <i>n.a.</i>                           | <i>n.a.</i> | O-Thr | Dhb    | Ahp     | Phe | N-MeTyr         | Val | Gln-BA          | [69]       |
|                     |       |                                       | TAU IL-     |       |        |         |     |                 |     |                 |            |
|                     |       | <i>Nostoc/Microcysti</i>              | 235/NIVA    |       |        |         |     |                 |     |                 |            |
| Nostopeptin BN920   | 920.5 | <i>s aeruginosa</i>                   | Cya 43      | O-Thr | Leu    | Ahp     | Phe | N-MeTyr         | Val | GlnAc           | [10, 40]   |
| Micropeptin LH920   | 920.5 | <i>Microcystis</i>                    | TAU IL-37   | O-Thr | Gln    | Ahp     | Phe | N-MeTyr         | Val | Gly-HA          | [75]       |
| Cyanopeptolin 920   | 920.5 | <i>n.a.</i>                           | <i>n.a.</i> | O-Thr | Lys    | Ahp     | Phe | N-MeTyr         | Val | Leu-Ac          | [76]       |
| Micropeptin MZ925   | 925.4 | <i>Microcystis</i>                    | TAU IL-361  | O-Thr | Arg    | Ahp     | Ile | N-MePhe         | Ile | SuGA            | [47, 72]   |
| Cyanopeptolin S     | 925.4 | <i>n.a.</i>                           | <i>n.a.</i> | O-Thr | Arg    | Ahp     | Ile | N-MeTyr         | Val | SuGa            | [42, 77]   |
|                     |       |                                       |             |       | di-Me- |         |     |                 |     |                 |            |
| Micropeptin LH925   | 925.4 | <i>Microcystis</i>                    | TAU IL-37   | O-Thr | Lys    | Ahp     | Ile | N-MePhe         | Ile | SuGA            | [75]       |
| Nostopeptin B       | 926.5 | <i>Nostoc minutum</i>                 | NIES-26     | O-Hmp | Leu    | Ahp     | Ile | N-MeTyr         | Ile | Gln-AC          | [9]        |
| Micropeptin KB928   | 928.5 | <i>Microcystis</i>                    | TAU IL-381  | O-Thr | Asp    | Ahp     | Val | N-MePhe         | Ile | Asp-BA          | [22]       |

|                       |       |                                      |             |       |        |         |     |                 |     |                |      |
|-----------------------|-------|--------------------------------------|-------------|-------|--------|---------|-----|-----------------|-----|----------------|------|
| Cyanopeptolin B       | 928.5 | <i>Microcystis aeruginosa</i>        | PCC7806     | O-Thr | Lys    | Ahp     | Leu | N-MePhe         | Val | Asp-HA         | [3]  |
| Cyanopeptolin 930     | 930.5 | <i>Microcystis</i>                   |             | O-Thr | Lys    | Ahp     | Leu | N-MeTyr         | Val | Glu-BA         | [72] |
| Micropeptin MM932     | 932.4 | <i>Microcystis Lyngbya semiplena</i> | TAU IL-36   | O-Thr | Leu    | Ahp     | Phe | N-MeTyr         | Ile | SuGA           | [42] |
| Lyngbyastatin 8       | 932.5 | <i>Chondromyces crocatus</i>         |             | O-Thr | Abu    | Ahp     | Phe | N-MeTyr         | Val | Val-Ac         | [57] |
| precrocapeptin A2     | 933.5 | <i>Chondromyces crocatus</i>         | Cm c5       | O-Thr | Leu    | Ahp     | Phe | N-MeTyr         | Val | Gln-Ibu        | [33] |
| crocapeptin A1        | 935.5 | <i>Microcystis</i>                   | Cm c5       | O-Thr | Leu    | Ahp     | Phe | N-MeTyr         | Val | Gln-Propionate | [33] |
| Micropeptin MZ939B    | 939.4 | <i>Microcystis</i>                   | TAU IL-361  | O-Thr | Arg    | O-MeAhp | Ile | N-MePhe         | Ile | 2-SuGA         | [47] |
| Micropeptin MZ939A    | 939.4 | <i>Microcystis</i>                   | TAU IL-361  | O-Thr | Arg    | O-MeAhp | Ile | N-MePhe         | Ile | 1-SuGA         | [47] |
| Insulapeptolide A     | 941.5 | <i>Nostoc insulare</i>               | SAG 54.79   | O-Hmp | Leu    | Ahp     | Ile | N-MeTyr         | Val | Ac-Cit         | [49] |
| Cyanopeptolin C       | 942.5 | <i>Microcystis aeruginosa</i>        | PCC7806     | O-Thr | Me-Lys | Ahp     | Leu | N-MePhe         | Val | Asp-HA         | [3]  |
| Micropeptin SD944     | 944.5 | <i>Microcystis aeruginosa</i>        | TAU IL-215  | O-Thr | Lys    | Ahp     | Ile | N-MeTyr         | Val | Asp-HA         | [78] |
| Micropeptin KT946     | 946.4 | <i>Microcystis</i>                   | MB-K        | O-Thr | Hty    | Ahp     | Ile | N-MePhe         | Ile | Su-GA          | [24] |
| Lyngbyastatin 7       | 946.5 | <i>Lyngbya semiplena</i>             | <i>n.a.</i> | O-Thr | Abu    | Ahp     | Phe | N-MeTyr         | Val | Gln-Ha         | [58] |
| Streptopectolin       | 947.4 | <i>Streptomyces olivochromogene</i>  |             |       |        |         |     |                 |     |                |      |
| Kempopeptin C         | 948.5 | <i>s</i>                             | NBRC 3561   | O-Thr | Gln    | Ahp     | Phe | N-MeTyr         | Ala | Gln-Mba        | [34] |
|                       |       | <i>n.a.</i>                          | <i>n.a.</i> | O-Thr | Lys    | Ahp     | Leu | N,O-diMe-Cl-Tyr | Val | Val-BA         | [52] |
| crocapeptin A2        | 949.5 | <i>Chondromyces crocatus</i>         | Cm c5       | O-Thr | Leu    | Ahp     | Phe | N-MeTyr         | Val | Gln-Ibu        | [33] |
| Anabaenopeptilide 90A | 952.5 | <i>Anabaena</i>                      | strain 90   | O-Thr | Hty    | Ahp     | Thr | N,O-diMeTyr     | Ile | N-formyl-Gln   | [5]  |
| Cyanopeptolin 954     | 954.4 | <i>Microcystis aeruginosa</i>        | NIVA Cya 43 | O-Thr | Leu    | Ahp     | Phe | N-Me-Cl-Tyr     | Val | GlnAc          | [40] |
| Nostopeptin A         | 954.5 | <i>Nostoc minutum</i>                | NIES-26     | O-Hmp | Leu    | Ahp     | Ile | N-MeTyr         | Ile | Gln-BA         | [9]  |
| Insulapeptolide B     | 955.5 | <i>Nostoc insulare</i>               | SAG 54.79   | O-Hmp | Leu    | Ahp     | Ile | N-MeTyr         | Leu | Ac-Cit         | [49] |
| Insulapeptolide C     | 955.5 | <i>Nostoc insulare</i>               | SAG 54.79   | O-Hmp | Leu    | Ahp     | Ile | N,O-diMeTyr     | Val | Ac-Cit         | [49] |
| Micropeptin KB956     | 956.5 | <i>Microcystis</i>                   | TAU IL-381  | O-Thr | Asp    | O-MeAhp | Val | N-MePhe         | Ile | O-Me-Asp-BA    | [22] |
| Cyanopeptolin A       | 956.5 | <i>Microcystis aeruginosa</i>        | PCC7806     | O-Thr | Arg    | Ahp     | Leu | N-MePhe         | Val | Asp-HA         | [3]  |
| Cyanopeptolin D       | 956.6 | <i>Microcystis aeruginosa</i>        | PCC7806     | O-Thr | Lys    | Ahp     | Leu | N-MePhe         | Val | Asp-HA         | [3]  |
| Cyanopeptolin 958     | 958.5 | <i>Microcystis</i>                   |             | O-Thr | Arg    | Ahp     | Leu | N-MeTyr         | Val | Glu-BA         | [72] |
| Micropeptin B         | 958.5 | <i>Microcystis aeruginosa</i>        | NIES-100    | O-Thr | Lys    | Ahp     | Leu | N-MeTyr         | Val | Glu-HA         | [37] |
| Cyanopeptolin 959     | 959.4 | <i>n.a.</i>                          | <i>n.a.</i> | O-Thr | Arg    | Ahp     | Phe | N-MeTyr         | Ile | SuGA           | [76] |

|                       |       |                                                      |                           |       |     |         |     |             |     |                  |          |
|-----------------------|-------|------------------------------------------------------|---------------------------|-------|-----|---------|-----|-------------|-----|------------------|----------|
| Cyanopeptolin 960     | 960.4 | <i>Oscillatoria/<br/>Planktothrix<br/>agardhii</i>   | CYA 126/8                 | O-Thr | Hty | Ahp     | Ile | N-MePhe     | Ile | 2-O-MeSuGa       | [25]     |
| Lyngbyastatin 9       | 960.5 | Lyngbya<br>sempilena                                 |                           | O-Thr | Abu | Ahp     | Phe | N-MeTyr     | Val | Val-BA           | [57]     |
| Bouillomide A         | 960.5 | <i>Lyngbya bouillonii</i>                            | <i>n.a.</i>               | O-Thr | Dhb | Ahp     | Phe | N-MeTyr     | Val | Leu-Ala-BA       | [19]     |
| Micropeptin HH960     | 960.5 | <i>Microcystis<br/>aeruginosa</i>                    | TAU IL-347                | O-Thr | Leu | Ahp     | Leu | N-MePhe     | Val | Asn-Hpla         | [79]     |
| Micropeptin 90        | 961.4 | <i>Microcystis<br/>aeruginosa</i>                    | NIES-90                   | O-Thr | Arg | Ahp     | Phe | N-MeTyr     | Val | SuGA             | [61]     |
| Molassamide           | 962.5 | <i>Leptolyngbya<br/>sp./Dichothrix<br/>utahensis</i> | DRTO-73                   | O-Thr | Abu | Ahp     | Phe | N-MeTyr     | Val | Thr-Ala-BA       | [6, 52]  |
| Cyanopeptolin CP962   | 962.5 | <i>Nostoc edaphicum</i>                              | CCNP1411                  | O-Thr | Arg | Ahp     | Phe | N-MePhe     | Val | Asp-BA           | [8]      |
| Cyanopeptolin 963A    | 963.5 | <i>Microcystis<br/>aeruginosa</i>                    | PCC 7806                  | O-Thr | Tyr | Ahp     | Leu | N-MePhe     | Val | Glu-HA           | [80]     |
| crocapeptin A3        | 963.5 | <i>Chondromyces<br/>crocatus</i>                     | Cm c5                     | O-Thr | Leu | Ahp     | Phe | N-MeTyr     | Val | Gln-2-Me-Ibu     | [33]     |
| Micropeptin EI964     | 964.5 | <i>Microcystis<br/>aeruginosa</i>                    | TAU IL-217;<br>TAU IL-231 | O-Thr | Arg | Ahp     | Phe | N-MeTyr     | Ile | Asp-AC           | [10]     |
| Somamide A            | 965.5 | <i>n.a.</i>                                          | <i>n.a.</i>               | O-Thr | Dhb | Ahp     | Phe | N-MeTyr     | Val | Met-O-HA         | [69]     |
| Cyanopeptolin CP969   | 969.4 | <i>Nostoc edaphicum</i>                              | CCNP1411                  | O-Thr | Tyr | Ahp     | Phe | N-MePhe     | Val | Asp-BA           | [8]      |
| Micropeptin KB970B    | 970.5 | <i>Microcystis</i>                                   | TAU IL-381                | O-Thr | Asp | O-MeAhp | Val | N-MePhe     | Ile | Asp-HA           | [22]     |
| Micropeptin KB970A    | 970.5 | <i>Microcystis</i>                                   | TAU IL-381                | O-Thr | Asp | Ahp     | Val | N-MePhe     | Ile | O-Me-Asp-HA      | [22]     |
| Micropeptin KB970C    | 970.5 | <i>Microcystis</i>                                   | TAU IL-381                | O-Thr | Asp | O-MeAhp | Val | N-MePhe     | Val | O-Me-Asp-HA      | [22]     |
| Anabaenopeptilide 90B | 972.4 | <i>Anabaena</i>                                      | strain 90                 | O-Thr | Hty | Ahp     | Thr | N-Me-Cl-Tyr | Ile | N-formyl-Gln     | [5]      |
| Micropeptin 973       | 972.5 | <i>Microcystis<br/>panniformis</i>                   | MIRS-04                   | O-Thr | Arg | Ahp     | Ile | N-MePhe     | Val | Gln-BA           | [65]     |
| Cyanopeptolin 972     | 972.5 | <i>n.a.</i>                                          | <i>n.a.</i>               | O-Thr | Arg | Ahp     | Leu | N-MeTyr     | Val | Asp-HA           | [72, 81] |
| Stigonemapeptin       | 973.5 | <i>Stigonema</i>                                     |                           | O-Thr | Abu | Ahp     | Phe | N-MeTyr     | Val | Gln-N-formyl-Pro | [15]     |
| Loggerpeptin C        | 974.5 | <i>Leptolyngbya</i>                                  | DRTO-73                   | O-Thr | Leu | Ahp     | Phe | N-MeTyr     | Val | Abu-Ala-BA       | [52]     |
| Micropeptin 478A      | 975.4 | <i>Microcystis<br/>aeruginosa</i>                    | NIES-478                  | O-Thr | Arg | Ahp     | Ile | N-Me-Cl-Tyr | Ile | SuGA             | [62]     |
| Micropeptin HU975     | 975.4 | <i>Microcystis</i>                                   | TAU IL-342                | O-Thr | Arg | Ahp     | Ile | N-Me-Cl-Tyr | Ile | SuGA             | [73]     |
| Insulapeptolide D     | 976.6 | <i>Nostoc insulare</i>                               | SAG 54.79                 | O-Hmp | Leu | Ahp     | Ile | N,O-diMeTyr | Leu | Ac-Cit           | [49]     |
| Cyanopeptolin CP978   | 977.5 | <i>Nostoc edaphicum</i>                              | CCNP1411                  | O-Thr | Arg | Ahp     | Phe | N-MeTyr     | Val | Asp-BA           | [8]      |
| Micropeptin MM978     | 978.5 | <i>Microcystis</i>                                   | TAU IL-36                 | O-Thr | Gln | Ahp     | Phe | N-MeTyr     | Ile | Glu-HA           | [42]     |
| Micropeptin HM978     | 978.5 | <i>Microcystis</i>                                   | TAU IL-33                 | O-Thr | Leu | Ahp     | Ile | N-MePhe     | Val | Asn-Hpla         | [82]     |
| Micropeptin HH978     | 978.5 | <i>Microcystis<br/>aeruginosa</i>                    | TAU IL-347                | O-Thr | Leu | Ahp     | Leu | N-MePhe     | Val | Asn-Hpla         | [79]     |
| Micropeptin SD979     | 979.5 | <i>Microcystis<br/>aeruginosa</i>                    | TAU IL-215                | O-Thr | Tyr | Ahp     | Ile | N-MeTyr     | Val | Asp-HA           | [78]     |



|                     |       |                                      |                |       |     |         |     |                 |     |             |          |
|---------------------|-------|--------------------------------------|----------------|-------|-----|---------|-----|-----------------|-----|-------------|----------|
| Micropeptin GH979   | 979.5 | <i>Microcystis Scytonema</i>         | TAU IL-33      | O-Thr | Leu | Ahp     | Ile | N-MePhe         | Val | Asp-Hpla    | [82]     |
| Scyptolin A         | 980.5 | <i>hofmannii</i>                     | PCC 7110       | O-Thr | Leu | Ahp     | Thr | N-Me-Cl-Tyr     | Val | Thr-Ala-BA  | [13]     |
| Cyanopeptolin 984   | 983.4 | <i>Microcystis wesenbergii</i>       | NIVA-CYA 172/5 | O-Thr | Leu | Ahp     | Phe | N-Me-Cl-Tyr     | Gln | GlnAC       | [83]     |
| Micropeptin HA983   | 983.4 | <i>Microcystis</i>                   | TAU IL-33      | O-Thr | Glu | Ahp     | Phe | N-Me-Cl-Tyr     | Ile | GlnAC       | [82]     |
| Cyanopeptolin 983   | 983.5 | <i>n.a.</i>                          | <i>n.a.</i>    | O-Thr | Leu | Ahp     | Val | N,O-diMeTyr     | Val | Gln-ProAc   | [84]     |
| Micropeptin KB984   | 984.6 | <i>Microcystis</i>                   | TAU IL-381     | O-Thr | Asp | O-MeAhp | Val | N-MePhe         | Ile | O-Me-Asp-HA | [22]     |
| Cyanopeptolin CP985 | 985.4 | <i>Nostoc edaphicum Radiocystis</i>  | CCNP1411       | O-Thr | Tyr | Ahp     | Phe | N-MeTyr         | Val | Asp-BA      | [8]      |
| Micropeptin K139    | 986.5 | <i>feernandoi</i>                    | <i>n.a.</i>    | O-Thr | Arg | Ahp     | Ile | N-MeTyr         | Ile | Asp-HA      | [29]     |
| Cyanopeptolin 986   | 986.5 | <i>n.a.</i>                          | <i>n.a.</i>    | O-Thr | Arg | Ahp     | Leu | N-MeTyr         | Val | Glu-HA      | [72]     |
| Micropeptin A       | 986.6 | <i>Microcystis aeruginosa</i>        | NIES-100       | O-Thr | Lys | Ahp     | Leu | N-MeTyr         | Val | Glu-OA      | [37, 72] |
| Micropeptin HU989   | 989.4 | <i>Microcystis</i>                   | TAU IL-342     | O-Thr | Arg | Ahp     | Ile | N,O-diMe-Cl-Tyr | Ile | SuGA        | [73]     |
| Insulapeptolide G   | 990.5 | <i>Nostoc insulare</i>               | SAG 54.79      | O-Thr | Phe | Ahp     | Thr | N-MePhe         | Val | Ser-Pro-BA  | [49]     |
| Kempopeptin A       | 990.5 | <i>Lyngbya</i>                       | <i>n.a.</i>    | O-Thr | Leu | Ahp     | Phe | N-MeTyr         | Val | Thr-Pro     | [28]     |
| Cyanopeptolin CP990 | 990.5 | <i>Nostoc edaphicum Chondromyces</i> | CCNP1411       | O-Thr | Arg | Ahp     | Phe | N-MePhe         | Val | Asp-HA      | [8]      |
| crocapeptin B       | 990.5 | <i>crocatus</i>                      | Cm c5          | O-Thr | Leu | Ahp     | Phe | N-MeTyr         | Ile | Cit-Ibu     | [33]     |
| Cyanopeptolin 991   | 991.4 | <i>Microcystis</i>                   |                | O-Thr | Arg | Ahp     | Leu | N-MePhe         | Val | diSuGA      | [72]     |
| Kempopeptin B       | 992.5 | <i>Lyngbya</i>                       | <i>n.a.</i>    | O-Thr | Lys | Ahp     | Ile | N,O-diMe-Br-Tyr | Val | Val-BA      | [28]     |
| Micropeptin EI992   | 992.5 | <i>Microcystis aeruginosa</i>        | TAU IL-217;    | O-Thr | Arg | Ahp     | Phe | N-MeTyr         | Ile | Asp-BA      | [10]     |
| Cyanopeptolin 992   | 992.5 | <i>Microcystis</i>                   | TAU IL-231     | O-Thr | Lys | Ahp     | Phe | N-MeTyr         | Val | Glu-HA      | [72]     |
| Cyanopeptolin CP992 | 992.5 | <i>Nostoc edaphicum</i>              | CCNP1411       | O-Thr | Arg | Ahp     | Phe | N,O-diMeTyr     | Val | Asp-BA      | [8]      |
| Loggerpeptin A      | 992.5 | <i>Leptolyngbya</i>                  | DRTO-73        | O-Thr | Leu | Ahp     | Phe | N-MeTyr         | Val | Thr-Ala-BA  | [52]     |
| Micropeptin KB992   | 992.5 | <i>Microcystis</i>                   | TAU IL-381     | O-Thr | Leu | O-MeAhp | Ile | N-MePhe         | Val | Asn-Hpla    | [22]     |
| Micropeptin HH992   | 992.5 | <i>Microcystis aeruginosa</i>        | TAU IL-347     | O-Thr | Leu | Ahp     | Leu | N-MePhe         | Val | Asn-Hpla    | [79]     |
| Micropeptin E       | 993.5 | <i>Microcystis aeruginosa</i>        | NIES-100       | O-Thr | Tyr | Ahp     | Leu | N-MeTyr         | Val | Glu-HA      | [20, 72] |
| Micropeptin SF995   | 995.5 | <i>n.a.</i>                          | <i>n.a.</i>    | O-Thr | Arg | Ahp     | Ile | N-MeTrp         | Val | Asp-HA      | [74]     |
| Micropeptin 996     | 996.5 | <i>Microcystis aeruginosa</i>        | UTEX LB2386    | O-Thr | Hty | Ahp     | Phe | N-MePhe         | Val | Gln-BA      | 66       |
| Cyanopeptolin 997 B | 997.5 | <i>n.a.</i>                          | <i>n.a.</i>    | O-Thr | Leu | Ahp     | Val | N,O-diMeTyr     | Leu | Gln-ProAc   | [84]     |
| Cyanopeptolin 997 A | 997.5 | <i>n.a.</i>                          | <i>n.a.</i>    | O-Thr | Leu | Ahp     | Leu | N-MeTyr         | Leu | Gln-ProAc   | [84]     |
| Cyanopeptolin 997 C | 997.5 | <i>n.a.</i>                          | <i>n.a.</i>    | O-Thr | Leu | Ahp     | Leu | N,O-diMeTyr     | Val | Gln-ProAc   | [84]     |
| Micropeptin KR998   | 998.5 | <i>Microcystis aeruginosa</i>        | TAU IL-40      | O-Thr | Tyr | Ahp     | Phe | N-MeTyr         | Val | Gln-BA      | [85]     |
| Cyanopeptolin CP999 | 999.5 | <i>Nostoc edaphicum</i>              | CCNP1411       | O-Thr | Tyr | Ahp     | Phe | N,O-diMeTyr     | Val | Asp-BA      | [8]      |

|                        |        |                                          |              |       |       |         |        |               |     |             |             |
|------------------------|--------|------------------------------------------|--------------|-------|-------|---------|--------|---------------|-----|-------------|-------------|
| Micropeptin SD999      | 999.5  | <i>Microcystis aeruginosa</i>            | TAU IL-215   | O-Thr | Arg   | Ahp     | Ile    | N-Me-Kyn      | Val | Asp-HA      | [78]        |
| Kyanamide              | 1000.2 | <i>Caldora penicillata</i>               |              | O-Thr | Leu   | Ahp     | Phe    | N-MeTrp       | Val | Gln-HA      | [4]         |
| Cyanopeptolin 1000A    | 1000.6 | <i>n.a.</i>                              | <i>n.a.</i>  | O-Thr | Lys   | Ahp     | Leu    | N-MeTyr       | Ile | Glu-OA      | [76]        |
| Cyanopeptolin 1001     | 1001.5 | <i>n.a.</i>                              | <i>n.a.</i>  | O-Thr | Leu   | Ahp     | Leu    | N-Me-O-Cl-Tyr | Leu | Gln-Mdhp    | [84]        |
| Micropeptin KR 1002    | 1002.5 | <i>Microcystis aeruginosa</i>            | TAU IL-40    | O-Thr | H4Tyr | Ahp     | Phe    | N-MeTyr       | Val | Gln-BA      | [85]        |
| Micropeptin SD1002     | 1002.5 | <i>Microcystis aeruginosa</i>            | TAU IL-215   | O-Thr | Tyr   | Ahp     | Ile    | N-MeTrp       | Val | Asp-HA      | [78]        |
| Cyanopeptolin 1003     | 1003.5 | <i>n.a.</i>                              | <i>n.a.</i>  | O-Thr | Leu   | Ahp     | Val    | N-Me-O-Cl-Tyr | Val | Gln-ProAc   | [84]        |
| Insulapeptolide H      | 1004.5 | <i>Nostoc insulare</i>                   | SAG 54.79    | O-Thr | Phe   | Ahp     | Thr    | N-MePhe       | Leu | Ser-Pro-BA  | [49]        |
| Cyanopeptolin SS       | 1005.4 | <i>n.a.</i>                              | <i>n.a.</i>  | O-Thr | ??    | Ahp     | ??     | N-MeTyr       | ??  | ??          | [42, 49]    |
| Insulapeptolide F      | 1006.5 | <i>Nostoc insulare</i>                   | SAG 54.79    | O-Thr | Phe   | Ahp     | Thr    | N-MeTyr       | Val | Ser-Pro-BA  | [49]        |
| Cyanopeptolin 1007 MB2 | 1006.5 | <i>Microcystis n.a./Nostoc edaphicum</i> | n.a./CCNP141 | O-Thr | Lys   | Ahp     | Leu    | N-Me-Cl-Tyr   | Ile | Glu-HA      | [86]        |
| Cyanopeptolin CP1006   | 1006.5 | <i>n.a.</i>                              | 1            | O-Thr | Arg   | Ahp     | Phe    | N-MeTyr       | Val | Asp-HA      | [8, 72, 81] |
| Cyanopeptolin 1006D    | 1006.5 | <i>n.a.</i>                              | <i>n.a.</i>  | O-Thr | Lys   | Ahp     | Phe    | N-MeTyr       | Ile | Glu-HA      | [76]        |
| Micropeptin DR1006     | 1006.5 | <i>Microcystis aeruginosa</i>            | TAU IL-237   | O-Thr | Leu   | Ahp     | Leu    | N-MePhe       | Ile | Gln-Hpla    | [21]        |
| Cyanopeptolin 1009     | 1009.4 | <i>n.a.</i>                              | <i>n.a.</i>  | O-Thr | Arg   | Ahp     | Cl-Phe | N-MeTyr       | Ile | SuGA        | [81]        |
| Micropeptin T20        | 1010.3 | <i>Microcystis aeruginosa</i>            | <i>n.a.</i>  | O-Thr | Phe   | Ahp     | Phe    | N-MeTyr       | Ile | GA-Na2H2PO3 | [39]        |
| Cyanopeptolin 1011     | 1011.6 | <i>n.a.</i>                              | <i>n.a.</i>  | O-Thr | Leu   | Ahp     | Leu    | N,O-diMeTyr   | Leu | Gln-ProAc   | [84]        |
| Cl-Cyanopeptolin W     | 1012.4 | <i>n.a.</i>                              | <i>n.a.</i>  | O-Thr | Arg   | Ahp     | Phe    | N-Me-Cl-Tyr   | Ile | GluAc       | [81]        |
| Cyanopeptolin CP1013   | 1013.5 | <i>Nostoc edaphicum</i>                  | CCNP1411     | O-Thr | Tyr   | Ahp     | Phe    | N-MeTyr       | Val | Asp-HA      | [8]         |
| Cyanopeptolin 1014     | 1014.6 | <i>n.a.</i>                              | <i>n.a.</i>  | O-Thr | Arg   | Ahp     | Leu    | N-MeTyr       | Val | Glu-OA      | [72]        |
| Micropeptin T2         | 1015.5 | <i>n.a.</i>                              | <i>n.a.</i>  | O-Thr | Lys   | Ahp     | Phe    | N-MeTrp       | Val | Glu-HA      | [38]        |
| Cyanopeptolin 1017     | 1017.5 | <i>n.a.</i>                              | <i>n.a.</i>  | O-Thr | Leu   | Ahp     | Val    | N-Me-O-Cl-Tyr | Leu | Gln-ProAc   | [84]        |
| Cyanopeptolin CP1018   | 1018.5 | <i>Nostoc edaphicum</i>                  | CCNP1411     | O-Thr | Arg   | Ahp     | Phe    | N-MePhe       | Val | Asp-OA      | [8]         |
| Micropeptin MZ1019     | 1019.4 | <i>Microcystis</i>                       | TAU IL-361   | O-Thr | Arg   | O-MeAhp | Ile    | N-MePhe       | Ile | 1,2-SuGA    | 47          |
| Cyanopeptolin 1020B    | 1020.5 | <i>Microcystis</i>                       |              | O-Thr | Lys   | Ahp     | Leu    | N-MeTyr       | Val | Glu-OA      | [72]        |
| Insulapeptolide E      | 1020.5 | <i>Nostoc insulare</i>                   | SAG 54.79    | O-Thr | Phe   | Ahp     | Thr    | N-MeTyr       | Leu | Ser-Pro-BA  | [49]        |
| Cyanopeptolin 1020     | 1020.5 | <i>Microcystis aeruginosa</i>            | UV006        | O-Thr | Arg   | Ahp     | Phe    | N-MeTyr       | Val | Glu-HA      | [35, 72]    |
| Cyanopeptolin CP1020   | 1020.5 | <i>Nostoc edaphicum</i>                  | CCNP1411     | O-Thr | Arg   | Ahp     | Phe    | N,O-diMeTyr   | Val | Asp-HA      | [8]         |
| Micropeptin HU1021     | 1021.4 | <i>Microcystis</i>                       | TAU IL-342   | O-Thr | Arg   | Ahp     | Ile    | N-MeTyr       | Ile | diSuGA      | [73]        |
| Micropeptin LH1021     | 1021.5 | <i>Microcystis</i>                       | TAU IL-37    | O-Thr | Gln   | Ahp     | Phe    | N-MeTyr       | Val | Thr-Gly-HA  | [75]        |
| Micropeptin F          | 1021.5 | <i>Microcystis aeruginosa</i>            | NIES-100     | O-Thr | Tyr   | Ahp     | Leu    | N-MeTyr       | Val | Glu-OA      | [20, 72]    |
| Aeruginopeptin 917SC   | 1022.5 | <i>n.a.</i>                              | <i>n.a.</i>  | O-Thr | Leu   | Ahp     | Leu    | N-MeTyr       | Ile | Hpla-Gln    | [55]        |

|                        |        |                                 |              |       |       |         |          |                 |     |                  |          |
|------------------------|--------|---------------------------------|--------------|-------|-------|---------|----------|-----------------|-----|------------------|----------|
| Cyanopeptolin 1025     | 1025.6 | <i>n.a.</i>                     | <i>n.a.</i>  | O-Thr | Leu   | Ahp     | Leu      | N,O-diMeTyr     | Leu | Gln-PrPro        | [84]     |
| Cyanopeptolin CP1027   | 1027.5 | <i>Nostoc edaphicum</i>         | CCNP1411     | O-Thr | Tyr   | Ahp     | Phe      | N,O-diMeTyr     | Val | Asp-HA           | [8]      |
| Micropeptin C          | 1027.5 | <i>Microcystis aeruginosa</i>   | NIES-100     | O-Thr | Tyr   | Ahp     | Phe      | N-MeTyr         | Val | Glu-HA           | [20]     |
| Micropeptin KR1030     | 1030.5 | <i>aeruginosa</i>               | TAU IL-40    | O-Thr | H4Tyr | Ahp     | Phe      | N-MeTyr         | Val | Gln-HA           | [85]     |
| Cyanopeptolin 1032     | 1031.5 | <i>n.a.</i>                     | <i>n.a.</i>  | O-Thr | Leu   | Ahp     | Leu      | N,O-diMeTyr     | Leu | Gln-PrPro        | [84]     |
| Oscillapeptilide 97B   | 1031.5 | <i>Oscillatoria/agardhii</i>    | strain 97    | O-Thr | Leu   | Ahp     | Phe      | N-MeTyr         | Ile | Gln-N-AcPro      | [27]     |
| Cyanopeptolin CB071    | 1034.5 | <i>Aphanocapsa</i>              | 1001         | O-Thr | Arg   | Ahp     | Ile      | N,O-diMe-Cl-Tyr | Val | Glu-HA           | [16]     |
| Cyanopeptolin 1034     | 1034.6 | <i>n.a.</i>                     | <i>n.a.</i>  | O-Thr | Lys   | Ahp     | Phe      | N-MeTyr         | Ile | Glu-OA           | [76]     |
| Lyngbyastatin 10       | 1038.4 | Lyngbya semiplena               |              | O-Thr | Abu   | Ahp     | Phe      | N-Me-Br-Tyr     | Val | Val-BA           | [57]     |
| Bouillomide B          | 10384  | <i>Lyngbya bouillonii</i>       | <i>n.a.</i>  | O-Thr | Dhb   | Ahp     | Phe      | N-Me-Br-Tyr     | Val | Leu-Ala-BA       | [19]     |
| Cyanopeptolin 1041     | 1040.5 | <i>n.a.</i>                     | <i>n.a.</i>  | O-Thr | Arg   | Ahp     | Phe      | N-MeTyr         | Val | Glu-HA           | [87]     |
| A90720A                | 1040.5 | <i>Microchaete loktakensis</i>  | IC-39-2      | O-Thr | Arg   | Ahp     | Leu      | N-MeTyr         | Val | Leu-SuGA         | [7, 36]  |
| Micropeptin HU1041     | 1041.3 | <i>Microcystis</i>              | TAU IL-342   | O-Thr | Arg   | Ahp     | Ile      | N-Me-Cl-Tyr     | Val | diSuGA           | [73]     |
| Ichthyopeptin A        | 1042.5 | <i>Microcystis ichthyoblade</i> | BM Mi/13     | O-Thr | Tyr   | Ahp     | Val      | N-MePhe         | Ile | Gln-Hpla         | [54]     |
| Micropeptin KT1042     | 1042.5 | <i>Microcystis aeruginosa</i>   | TAU IL-347   | O-Thr | Tyr   | Ahp     | allo-Ile | N-MePhe         | Val | Gln-Hpla         | [41]     |
| Aeruginopeptin 228A    | 1044.5 | <i>Microcystis</i>              | TAC 954;     | O-Thr | H4Tyr | Ahp     | Thr      | N-MePhe         | Ile | Gln-Hpla         | [23]     |
| Micropeptin 103        | 1044.5 | <i>aeruginosa</i>               | M2285        | O-Thr | H4Tyr | Ahp     | Thr      | N-MePhe         | Ile | Gln-Hpla         | [23]     |
|                        |        | <i>Microcystis viridis</i>      | NIES-103     | O-Thr | Gln   | Ahp     | Phe      | N-MeTrp         | Val | Thr-Gly-HA       | [43]     |
| Oscillapeptilide 97A   | 1045.5 | <i>Oscillatoria/agardhii</i>    | strain 97    | O-Thr | Leu   | Ahp     | Phe      | N,O-diMeTyr     | Ile | Gln-N-AcPro      | [27]     |
| Micropeptin KB1046     | 1046.5 | <i>Microcystis</i>              | TAU IL-381   | O-Thr | H4Tyr | Ahp     | Val      | N-MePhe         | Ile | Gln-Hpla         | [22]     |
| Aeruginopeptin 228B    | 1048.5 | <i>Microcystis aeruginosa</i>   | TAC 954;     | O-Thr | H4Tyr | Ahp     | Thr      | N-MePhe         | Ile | Gln-Hpla         | [23]     |
| Micropeptin KB1048     | 1048.5 | <i>aeruginosa</i>               | M2285        | O-Thr | H4Tyr | Ahp     | Thr      | N-MePhe         | Ile | Gln-Hpla         | [23]     |
| Cyanopeptolin CP1048   | 1048.6 | <i>Microcystis</i>              | TAU IL-381   | O-Thr | Asp   | O-MeAhp | Ile      | N-Me-Cl-Tyr     | Ile | O-Me-Asp-HA      | [22]     |
| Micropeptin LH1048     | 1048.6 | <i>Nostoc edaphicum</i>         | CCNP1411     | O-Thr | Arg   | Ahp     | Phe      | N,O-diMeTyr     | Val | Asp-OA           | [8]      |
| Anabaenopeptilide 202A | 1048.6 | <i>Microcystis</i>              | TAU IL-37    | O-Thr | Arg   | Ahp     | Phe      | N-MeTyr         | Val | Glu-OA           | [72, 75] |
|                        | 1049.5 | <i>Anabaena</i>                 | strain 202A2 | O-Thr | Hty   | Ahp     | Thr      | N-MeTyr         | Ile | Gln-N-formyl-Pro | [5]      |
| Symplocamide A         | 1050.4 | <i>Symploca</i>                 | PNG-         | O-Thr | Hty   | Ahp     | Thr      | N-MeTyr         | Ile | Gln-N-formyl-Pro | [5]      |
| Micropeptin T1         | 1050.5 | <i>Symploca</i>                 | 12/15/03-5   | O-Thr | Arg   | Ahp     | Ile      | N,O-diMeTyr     | Val | Gln-BA           | [31]     |
| Cyanopeptolin 1054     | 1050.5 | <i>n.a.</i>                     | <i>n.a.</i>  | O-Thr | Tyr   | Ahp     | Phe      | N-MeTrp         | Val | Glu-HA           | [38]     |
| MB1                    | 1054.5 | <i>n.a.</i>                     |              | O-Thr | Arg   | Ahp     | Phe      | N-Me-Cl-Tyr     | Ile | Glu-HA           | [86]     |

|                        |        |                                            |                      |       |           |     |         |                 |     |                  |      |
|------------------------|--------|--------------------------------------------|----------------------|-------|-----------|-----|---------|-----------------|-----|------------------|------|
| Cyanopeptolin 1054 MB2 | 1054.5 | <i>n.a.</i>                                |                      | O-Thr | Me-Lys    | Ahp | Phe     | N-Me-Cl-Tyr     | Ile | Glu-HA           | [86] |
| Micropeptin 478B       | 1055.3 | <i>Microcystis aeruginosa</i>              | NIES-478             | O-Thr | Arg       | Ahp | Ile     | N-Me-Cl-Tyr     | Ile | diSuGA           | [62] |
| Micropeptin D          | 1055.5 | <i>Microcystis aeruginosa</i>              | NIES-100             | O-Thr | Tyr       | Ahp | Phe     | N-MeTyr         | Val | Glu-OA           | [20] |
| Lyngbyastatin 5        | 1056.5 | <i>Lyngbya</i>                             | <i>n.a.</i>          | O-Thr | Abu       | Ahp | Phe     | N-MeTyr         | Val | Hty-Ala-Ga       | [58] |
| Micropeptin DR1056     | 1056.5 | <i>Microcystis aeruginosa</i>              | TAU IL-237 and IL-23 | O-Thr | Tyr       | Ahp | Leu     | N-MePhe         | Ile | Gln-Hpla         | [21] |
| Hofmannolin            | 1057.5 | <i>Scytonema hofmannii</i>                 | PCC 7110             | O-Thr | Phe       | Ahp | O-MeTyr | N-MeTyr         | Val | Glu-Hmv          | [14] |
| Micropeptin TR1058     | 1058.5 | <i>Microcystis</i>                         | TAU IL-428           | O-Thr | Gln       | Ahp | Ile     | N-MePhe         | Val | Tyr-Hpla         | [88] |
| Micropeptin DR1060     | 1060.5 | <i>Microcystis aeruginosa</i>              | TAU IL-237 and IL-23 | O-Thr | H4Tyr     | Ahp | Leu     | N-MePhe         | Ile | Gln-Hpla         | [21] |
| Planktopeptin BL1061   | 1061.6 | <i>Oscillatoria/Planktothrix rubescens</i> | <i>n.a.</i>          | O-Thr | Leu       | Ahp | Thr     | N-MeTyr         | Ile | Gln-Leu-GA       | [45] |
| Oscillapeptin C        | 1061.6 | <i>Oscillatoria/Planktothrix agardhii</i>  | NIES-205             | O-Thr | H4Tyr     | Ahp | Ile     | N-MePhe         | Ile | Hty-OMeGa        | [28] |
| Micropeptin 88N        | 1062.6 | <i>Microcystis aeruginosa</i>              | NIES-88              | O-Thr | Tyr       | Ahp | Val     | N-MePhe         | Ile | Glu-Leu-BA       | [64] |
| Micropeptin 88E        | 1062.6 | <i>Microcystis aeruginosa</i>              | NIES-88              | O-Thr | Leu       | Ahp | Val     | N-MePhe         | Ile | Glu-Tyr-BA       | [63] |
| Micropeptin LH1062     | 1062.6 | <i>Microcystis</i>                         | TAU IL-37            | O-Thr | Arg       | Ahp | Phe     | N-MeTyr         | Val | MeO-Glu-OA       | [75] |
| Cyanopeptolin 1063     | 1063.6 | <i>n.a.</i>                                | <i>n.a.</i>          | O-Thr | Tyr       | Ahp | Ile     | N-MeTyr         | Ile | Gln-LeuAc        | [76] |
| Pompanopeptin A        | 1068.4 | <i>Lyngbya confervoides</i>                | <i>n.a.</i>          | O-Thr | Arg       | Ahp | Ile     | N,O-diMe-Br-Tyr | Val | Met(O)-Ba        | [68] |
| Cyanopeptolin 1068     | 1068.5 | <i>Microcystis aeruginosa</i>              | <i>n.a.</i>          | O-Thr | di-Me-Lys | Ahp | Phe     | N-Me-Cl-Tyr     | Ile | Glu-HA           | [86] |
| Micropeptin HU1069     | 1069.4 | <i>Microcystis</i>                         | TAU IL-342           | O-Thr | Arg       | Ahp | Ile     | N,O-diMe-Cl-Tyr | Ile | diSuGA           | [73] |
| Anabaenopeptilide 202B | 1069.5 | <i>Anabaena</i>                            | strain 202A2         | O-Thr | Hty       | Ahp | Thr     | N-Me-Cl-Tyr     | Ile | Gln-N-formyl-Pro | [5]  |
| Aeruginopeptin 917SA   | 1072.5 | <i>Microcystis</i>                         | <i>n.a.</i>          | O-Thr | Tyr       | Ahp | Leu     | N-MeTyr         | Ile | Gln-Hpla         | [55] |
| Microcystilide A       | 1072.5 | <i>Microcystis aeruginosa</i>              | NO-15-1840           | O-Thr | Tyr       | Ahp | Leu     | N-MeTyr         | Ile | Gln-Hpla         | [59] |
| Aeruginopeptin 917SB   | 1076.5 | <i>n.a.</i>                                | <i>n.a.</i>          | O-Thr | H4Tyr     | Ahp | Leu     | N-MeTyr         | Ile | Hpla-Gln         | [55] |
| Micropeptin 88B        | 1078.5 | <i>Microcystis aeruginosa</i>              | NIES-88              | O-Thr | Glu       | Ahp | Val     | N-MePhe         | Ile | Glu-Tyr-BA       | [63] |
| Micropeptin 88Y        | 1084.5 | <i>Microcystis aeruginosa</i>              | NIES-88              | O-Thr | Tyr       | Ahp | Val     | N-MePhe         | Ile | Glu-TyrAc        | [64] |

|                      |        |                                                     |                   |       |       |     |     |                 |     |                     |          |
|----------------------|--------|-----------------------------------------------------|-------------------|-------|-------|-----|-----|-----------------|-----|---------------------|----------|
| Oscillapeptin F      | 1088.5 | <i>Oscillatoria/<br/>Planktothrix<br/>agardhii</i>  | NIES-596          | O-Thr | Lys   | Ahp | Ile | N-MePhe         | Ile | Hty-O-Me-SuGA       | [28]     |
| Oscillapeptin J      | 1092.4 | <i>Oscillatoria/<br/>Planktothrix<br/>rubescens</i> |                   | O-Thr | Arg   | Ahp | Thr | N-MeTyr         | Ile | Tyr-SuGA            | [67]     |
| Jizanpeptin A        | 1104.4 | <i>n.a.</i>                                         | <i>n.a.</i>       | O-Thr | Lys   | Ahp | Ile | N,O-diMe-Br-Tyr | Ile | Val-SuGA            | [56]     |
| Micropeptin 1106     | 1105.6 | <i>Microcystis<br/>aeruginosa</i>                   | <i>n.a.</i>       | O-Thr | Arg   | Ahp | Val | N-MeTyr         | Ile | Glu-Tyr-BA          | [60]     |
| Oscillapeptin G      | 1111.5 | <i>Oscillatoria/<br/>Planktothrix<br/>agardhii</i>  |                   | O-Thr | Leu   | Ahp | Thr | N-MeTyr         | Ile | Gln-Hty-GA          | [35]     |
| Micropeptin 88C      | 1112.5 | <i>Microcystis<br/>aeruginosa</i>                   | NIES-88           | O-Thr | Tyr   | Ahp | Val | N-MePhe         | Ile | Glu-Tyr-BA          | [63]     |
| Micropeptin 88F      | 1112.5 | <i>Microcystis<br/>aeruginosa</i>                   | NIES-88           | O-Thr | Tyr   | Ahp | Val | N-MePhe         | Ile | O-Me-Glu-Tyr-BA     | [63]     |
| Nostocyclin          | 1116.5 | <i>Nostoc</i>                                       | DUN901            | O-Thr | Hse   | Ahp | Phe | N-MePhe         | Val | Hse-Ile-Hpla        | [11]     |
| Micropeptin 88D      | 1116.6 | <i>Microcystis<br/>aeruginosa</i>                   | NIES-88           | O-Thr | H4Tyr | Ahp | Val | N-MePhe         | Ile | Glu-Tyr-BA          | [63]     |
| Jizanpeptin B        | 1118.4 | <i>n.a.</i>                                         | <i>n.a.</i>       | O-Thr | Lys   | Ahp | Ile | N,O-diMe-Br-Tyr | Ile | (R)Val-O-Me-SuGA    | [56]     |
| Jizanpeptin C        | 1118.4 | <i>n.a.</i>                                         | <i>n.a.</i>       | O-Thr | Lys   | Ahp | Ile | N,O-diMe-Br-Tyr | Ile | (S)Val-O-Me-SuGA    | [56]     |
| Micropeptin 1120     | 1119.6 | <i>Microcystis<br/>aeruginosa</i>                   | <i>n.a.</i>       | O-Thr | Arg   | Ahp | Val | N-MeTyr         | Ile | OMeGlu-Tyr-BA       | [60]     |
| Scyptolin B          | 1121.5 | <i>Scytonema<br/>hofmannii</i>                      | PCC 7110          | O-Thr | Leu   | Ahp | Thr | N-Me-Cl-Tyr     | Val | Ala-BA-Thr-Ala-BA   | [13]     |
| Planktopeptin BL1125 | 1125.6 | <i>Oscillatoria/<br/>Planktothrix<br/>rubescens</i> | <i>n.a.</i>       | O-Thr | Leu   | Ahp | Thr | N-MeTyr         | Ile | Gln-Hty-GA          | [45]     |
| Oscillapeptin D      | 1127.5 | <i>Oscillatoria/<br/>Planktothrix<br/>agardhii</i>  | NIES-205          | O-Thr | Hty   | Ahp | Ile | N-MePhe         | Ile | Hty-O-Me-SuGA       | [28]     |
| Jizanpeptin D        | 1132.4 | <i>n.a.</i>                                         | <i>n.a.</i>       | O-Thr | Lys   | Ahp | Ile | N,O-diMe-Br-Tyr | Ile | Ile-O-Me-SuGA       | [56]     |
| Loggerpeptin B       | 1133.6 | <i>Leptolyngbya<br/>Lyngbya</i>                     | DRTO-73           | O-Thr | Leu   | Ahp | Phe | N-MeTyr         | Val | Thr-Ala-BA-O-Ala-BA | [52]     |
| Lyngbyastatin 4      | 1136.4 | <i>confervoides</i>                                 | <i>n.a.</i>       | O-Thr | Abu   | Ahp | Phe | N-Me-Tyr        | Val | Htyr-Ala-SuGa       | [44]     |
| Oscillapeptin E      | 1137.5 | <i>Oscillatoria/<br/>Planktothrix<br/>agardhii</i>  | NIES-205          | O-Thr | H4Tyr | Ahp | Ile | N-MePhe         | Ile | Hty-O-Me-SuGA       | [28, 89] |
| Aeruginopeptin 95A   | 1145.5 | <i>Microcystis<br/>aeruginosa</i>                   | TAC 954;<br>M2285 | O-Thr | Tyr   | Ahp | Thr | N-MePhe         | Ile | Gln-Thr-Hpla        | [23]     |
| Jizanpeptin E        | 1146.4 | <i>n.a.</i>                                         | <i>n.a.</i>       | O-Thr | Arg   | Ahp | Ile | N,O-diMe-Br-Tyr | Ile | Val-O-Me-SuGA       | [56]     |

|                    |        |                                           |                |       |        |     |          |             |     |                  |      |
|--------------------|--------|-------------------------------------------|----------------|-------|--------|-----|----------|-------------|-----|------------------|------|
| Aeruginopeptin 95B | 1149.6 | <i>Microcystis aeruginosa</i>             | TAC 954; M2285 | O-Thr | H4Tyr  | Ahp | Thr      | N-MePhe     | Ile | Gln-Thr-Hpla     | [23] |
| Lyngbyastatin 6    | 1150.5 | <i>Lyngbya</i>                            | <i>n.a.</i>    | O-Thr | Abu    | Ahp | Phe      | N-MeTyr     | Val | Hty-Ala-Na-SuGa  | [58] |
| Oscillapeptin A    | 1167.5 | <i>Oscillatoria/Planktothrix agardhii</i> | NIES-204       | O-Thr | Hty    | Ahp | Ile      | N,O-diMeTyr | Ile | Hty-OMeSuGa      | [46] |
| Oscillapeptin B    | 1181.5 | <i>Oscillatoria/Planktothrix agardhii</i> | NIES-204       | O-Thr | Me-Tyr | Ahp | Ile      | N,O-diMeTyr | Ile | Hty-O-Me-SuGA    | [28] |
| Largamide E        | 1187.6 | <i>Planktothrix</i>                       | FL31-01        | O-Thr | Tyr    | Ahp | Thr      | N-Me-Cl-Tyr | Val | Val-Ala-Ahppa-GA | [26] |
| Largamide D        | 1213.5 | <i>Lyngbya confervoides</i>               | <i>n.a.</i>    | O-Thr | Leu    | Ahp | allo-Thr | N-Me-Br-Tyr | Val | Val-Ala-Ahppa-GA | [90] |
| Largamide D        | 1231.5 | <i>Oscillatoria/Planktothrix</i>          | FL31-01        | O-Thr | Hty    | Ahp | Thr      | N-Me-Br-Tyr | Val | Val-Ala-Ahppa-GA | [26] |
| Largamide F        | 1281.5 | <i>Oscillatoria/Planktothrix</i>          | FL31-01        | O-Thr | Leu    | Ahp | Thr      | N-Me-Br-Tyr | Val | Val-Ala-Ahppa-GA | [26] |
| Largamide G        | 1295.5 | <i>Oscillatoria/Planktothrix</i>          | FL31-01        | O-Thr | Leu    | Ahp | Thr      | N-Me-Br-Tyr | Val | Val-Ala-Ahppa-GA | [26] |

Table S2. Cyanopeptolin variants produced by the *Nostoc edaphicum* CCNP1411.

| Group               | Name     | Exact mass | (m/z) calc | (m/z)<br>[M+H] <sup>+</sup> | Error<br>mass | Retention<br>time | Structure                             | Mass of<br>isolated<br>CP [mg] | References |
|---------------------|----------|------------|------------|-----------------------------|---------------|-------------------|---------------------------------------|--------------------------------|------------|
| CP-Arg <sup>2</sup> | CP 777   | 777.4174   | 778.4252   | 778.43                      |               |                   | [Thr+Arg+Ahp+Phe+MePhe+Val]           | 0.3                            |            |
| CP-Arg <sup>2</sup> | CP 807   | 807.4279   | 808.4357   | 808.44                      |               |                   | [Thr+Arg+Ahp+Phe+diMeTyr+Val]         | 0.5                            |            |
| CP-Arg <sup>2</sup> | CP 892   | 892.4443   | 893.4521   | 893.4521                    | 0.0000        | 5.45              | [Thr+Arg+Ahp+Phe+MePhe+Val]Asp        |                                |            |
| CP-Arg <sup>2</sup> | CP 922   | 922.4549   | 923.4627   | 923.4635                    | 0.0008        | 5.02              | [Thr+Arg+Ahp+Phe+diMeTyr+Val]Asp      |                                |            |
| CP-Arg <sup>2</sup> | CP 934   | 934.4549   | 935.4627   | 935.4626                    | 0.0001        | 6.84              | [Thr+Arg+Ahp+Phe+MePhe+Val]Asp+Ac     | 0.3                            |            |
| CP-Arg <sup>2</sup> | CP 944   | 944.4967   | 945.5046   | 945.5050                    | 0.0005        | 5.81              | [Thr+Arg+Ahp+Leu+MeTyr+Val]Asp+BA     |                                |            |
| CP-Arg <sup>2</sup> | CP 950   | 950.4498   | 951.4576   | 951.4577                    | 0.0001        | 4.40              | [Thr+Arg+Ahp+Phe+MeTyr+Val]Asp+Ac     | 0.4                            |            |
| CP-Arg <sup>2</sup> | CP 962   | 962.4862   | 963.4940   | 963.4939                    | 0.0001        | 7.54              | [Thr+Arg+Ahp+Phe+MePhe+Val]Asp+BA     | 1.2                            | [8]        |
| CP-Arg <sup>2</sup> | CP 964   | 964.4654   | 965.4733   | 965.4731                    | 0.0001        | 6.69              | [Thr+Arg+Ahp+Phe+diMeTyr+Val]Asp+Ac   |                                |            |
| CP-Arg <sup>2</sup> | CP 976   | 976.5018   | 977.5096   | 977.5074                    | 0.0022        | 8.06              | [Thr+Arg+Ahp+Phe+MePhe+Leu]Asp+BA     |                                |            |
| CP-Arg <sup>2</sup> | CP 978   | 978.4811   | 979.4889   | 979.4889                    | 0.0000        | 6.04              | [Thr+Arg+Ahp+Phe+MeTyr+Val]Asp+BA     | 4.4                            | [8]        |
| CP-Arg <sup>2</sup> | CP 990   | 990.5175   | 991.5253   | 991.5246                    | 0.0007        | 8.51              | [Thr+Arg+Ahp+Phe+MePhe+Val]Asp+HA     | 3.9                            | [8]        |
| CP-Arg <sup>2</sup> | CP 992   | 992.4967   | 993.5046   | 993.5043                    | 0.0003        | 7.43              | [Thr+Arg+Ahp+Phe+diMeTyr+Val]Asp+BA   | 0.3                            | [8]        |
| CP-Arg <sup>2</sup> | CP 992b  | 992.4967   | 993.5046   | 993.5047                    | 0.0001        | 6.70              | [Thr+Arg+Ahp+Phe+MeTyr+Leu]Asp+BA     |                                |            |
| CP-Arg <sup>2</sup> | CP 992c  | 992.4967   | 993.5046   | 993.50                      |               |                   | [Thr+Arg+Ahp+Phe+MeTyr+Val]Glu+BA     |                                |            |
| CP-Arg <sup>2</sup> | CP 1006  | 1006.5124  | 1007.5202  | 1007.5198                   | 0.0004        | 7.33              | [Thr+Arg+Ahp+Phe+MeTyr+Val]Asp+HA     |                                | [76, 8]    |
| CP-Arg <sup>2</sup> | CP 1008  | 1008.4917  | 1009.4995  | 1009.50                     |               |                   | [Thr+Arg+Ahp+Phe+diMe,OTyr+Val]Asp+BA |                                |            |
| CP-Arg <sup>2</sup> | CP 1018  | 1018.5488  | 1019.5566  | 1019.5568                   | 0.0002        | 9.58              | [Thr+Arg+Ahp+Phe+MePhe+Val]Asp+OA     | 1.7                            | [8]        |
| CP-Arg <sup>2</sup> | CP 1020b | 1020.5280  | 1021.5359  | 1021.5350                   | 0.0009        | 8.41              | [Thr+Arg+Ahp+Phe+diMeTyr+Val]Asp+HA   | 1.2                            | [8]        |
| CP-Arg <sup>2</sup> | CP 1020  | 1020.5280  | 1021.5359  | 1021.54                     |               |                   | [Thr+Arg+Ahp+Phe+MeTyr+Val]Glu+HA     |                                | [35]       |
| CP-Arg <sup>2</sup> | CP 1034  | 1034.5437  | 1035.5515  | 1035.5509                   | 0.0006        | 8.51              | [Thr+Arg+Ahp+Phe+MeTyr+Val]Asp+OA     | 0.5                            |            |
| CP-Arg <sup>2</sup> | CP 1036  | 1036.5230  | 1037.5308  | 1037.5279                   | 0.0029        | 7.48              | [Thr+Arg+Ahp+Phe+diMe,OTyr+Val]Asp+HA |                                |            |
| CP-Arg <sup>2</sup> | CP 1046  | 1046.5801  | 1047.5879  | 1047.5870                   | 0.0009        | 10.69             | [Thr+Arg+Ahp+Phe+MePhe+Val]Asp+DA     | 0.2                            |            |
| CP-Arg <sup>2</sup> | CP 1048  | 1048.5593  | 1049.5672  | 1049.5671                   | 0.0001        | 9.47              | [Thr+Arg+Ahp+Phe+diMeTyr+Val]Asp+OA   | 1.1                            | [8]        |
| CP-Arg <sup>2</sup> | CP 1076  | 1076.5906  | 1077.5985  | 1077.5988                   | 0.0004        | 10.60             | [Thr+Arg+Ahp+Phe+diMeTyr+Val]Asp+DA   |                                |            |

| Group                 | Name     | Exact mass | (m/z) calc | (m/z)<br>[M+H-H <sub>2</sub> O] <sup>+</sup> | Error<br>mass | Retention<br>time | Structure                             | Mass of<br>isolated CP<br>[mg] | References |
|-----------------------|----------|------------|------------|----------------------------------------------|---------------|-------------------|---------------------------------------|--------------------------------|------------|
| CP-Leu <sup>2</sup>   | CP 891   | 891.4378   | 874.4351   | 874.4342                                     | 0.0009        | 10.24             | [Thr+Leu+Ahp+Phe+MePhe+Val]Asp+Ac     |                                |            |
| CP-Leu <sup>2</sup>   | CP 907   | 907.4327   | 890.4300   | 890.4299                                     | 0.0001        | 8.26              | [Thr+Leu+Ahp+Phe+MeTyr+Val]Asp+Ac     |                                |            |
| CP-Leu <sup>2</sup>   | CP 919   | 919.4691   | 902.4664   | 902.4663                                     | 0.0001        | 11.35             | [Thr+Leu+Ahp+Phe+MePhe+Val]Asp+BA     | 5.1                            |            |
| CP-Leu <sup>2</sup>   | CP 921   | 921.4484   | 904.4457   | 904.4441                                     | 0.0015        | 10.00             | [Thr+Leu+Ahp+Phe+diMeTyr+Val]Asp+Ac   |                                |            |
| CP-Leu <sup>2</sup>   | CP 933   | 933.4848   | 916.4820   | 916.48                                       |               |                   | [Thr+Leu+Ahp+Phe+MePhe+Val]Glu+BA     |                                |            |
| CP-Leu <sup>2</sup>   | CP 935   | 935.4640   | 918.4613   | 918.4610                                     | 0.0003        | 9.40              | [Thr+Leu+Ahp+Phe+MeTyr+Val]Asp+BA     | 2.1                            |            |
| CP-Leu <sup>2</sup>   | CP 947   | 947.5004   | 930.4977   | 930.4974                                     | 0.0003        | 12.69             | [Thr+Leu+Ahp+Phe+MePhe+Val]Asp+HA     |                                |            |
| CP-Leu <sup>2</sup>   | CP 949   | 949.4797   | 932.4770   | 932.4764                                     | 0.0005        | 11.11             | [Thr+Leu+Ahp+Phe+diMeTyr+Val]Asp+BA   | 4.6                            |            |
| CP-Leu <sup>2</sup>   | CP 963b  | 963.4953   | 946.4926   | 946.4920                                     | 0.0006        | 11.79             | [Thr+Leu+Ahp+Phe+diMeTyr+Val]Glu+BA   |                                |            |
| CP-Leu <sup>2</sup>   | CP 963   | 963.4953   | 946.4926   | 946.4916                                     | 0.0010        | 10.85             | [Thr+Leu+Ahp+Phe+MeTyr+Val]Asp+HA     |                                |            |
| CP-Leu <sup>2</sup>   | CP 965b  | 965.4746   | 948.4719   | 948.47                                       |               |                   | [Thr+Leu+Ahp+Phe+diMe,OTyr+Val]Asp+BA |                                |            |
| CP-Leu <sup>2</sup>   | CP 975   | 975.5317   | 958.5290   | 958.5276                                     | 0.0014        | 14.08             | [Thr+Leu+Ahp+Phe+MePhe+Val]Asp+OA     |                                |            |
| CP-Leu <sup>2</sup>   | CP 977   | 977.5110   | 960.5083   | 960.5083                                     | 0.0000        | 12.45             | [Thr+Leu+Ahp+Phe+diMeTyr+Val]Asp+HA   |                                |            |
| CP-Leu <sup>2</sup>   | CP 991   | 991.5266   | 974.5239   | 974.5215                                     | 0.0024        | 12.29             | [Thr+Leu+Ahp+Phe+MeTyr+Val]Asp+OA     |                                |            |
| CP-Leu <sup>2</sup>   | CP 1005  | 1005.5423  | 988.5396   | 988.5394                                     | 0.0001        | 13.84             | [Thr+Leu+Ahp+Phe+diMeTyr+Val]Asp+OA   |                                |            |
| CP-MeLeu <sup>2</sup> | CP 933b  | 933.4848   | 916.4820   | 916.48                                       |               |                   | [Thr+MeLeu+Ahp+Phe+MePhe+Val]Asp+BA   |                                |            |
| CP-MeLeu <sup>2</sup> | CP 949b  | 949.4797   | 932.4770   | 932.48                                       |               |                   | [Thr+MeLeu+Ahp+Phe+MeTyr+Val]Asp+BA   |                                |            |
| CP-MePhe <sup>2</sup> | CP 939b  | 939.4378   | 922.4351   | 922.44                                       |               |                   | [Thr+MePhe+Ahp+Phe+MePhe+Val]Asp+Ac   |                                |            |
| CP-MePhe <sup>2</sup> | CP 967b  | 967.4691   | 950.4664   | 950.47                                       |               |                   | [Thr+MePhe+Ahp+Phe+MePhe+Val]Asp+BA   |                                |            |
| CP-MePhe <sup>2</sup> | CP 1011c | 1011.4953  | 994.4926   | 994.49                                       |               |                   | [Thr+MePhe+Ahp+Phe+MeTyr+Val]Asp+HA   |                                |            |
| CP-Met <sup>2</sup>   | CP 937   | 937.4255   | 920.4228   | 920.42                                       |               |                   | [Thr+Met+Ahp+Phe+MePhe+Val]Asp+BA     |                                |            |
| CP-Met <sup>2</sup>   | CP 939   | 939.4048   | 922.4021   | 922.40                                       |               |                   | [Thr+Met+Ahp+Phe+diMeTyr+Val]Asp+Ac   |                                |            |
| CP-Met <sup>2</sup>   | CP 953b  | 953.4205   | 936.4177   | 936.42                                       |               |                   | [Thr+Met+Ahp+Phe+MeTyr+Val]Asp+BA     |                                |            |
| CP-Met <sup>2</sup>   | CP 995   | 995.4674   | 978.4647   | 978.47                                       |               |                   | [Thr+Met+Ahp+Phe+diMeTyr+Val]Asp+HA   |                                |            |
| CP-Met <sup>2</sup>   | CP 1023  | 1023.4987  | 1006.4960  | 1006.50                                      |               |                   | [Thr+Met+Ahp+Phe+diMeTyr+Val]Asp+OA   |                                |            |
| CP-MeTyr <sup>2</sup> | CP 999d  | 999.4590   | 982.4562   | 982.46                                       |               |                   | [Thr+MeTyr+Ahp+Phe+MeTyr+Val]Asp+BA   |                                |            |



|                       |          |           |           |          |        |       |                                       |         |
|-----------------------|----------|-----------|-----------|----------|--------|-------|---------------------------------------|---------|
| CP-MeTyr <sup>2</sup> | CP 1014  | 1014.1269 | 997.1241  | 997.1572 | 0.0331 | 16.64 | [Thr+MeTyr+Ahp+Phe+diMeTyr+Val]Asp+BA |         |
| CP-Phe <sup>2</sup>   | CP 925   | 925.4222  | 908.4194  | 908.4189 | 0.0005 | 10.58 | [Thr+Phe+Ahp+Phe+MePhe+Val]Asp+Ac     | 0.5     |
| CP-Phe <sup>2</sup>   | CP 953   | 953.4535  | 936.4507  | 936.4500 | 0.0007 | 11.61 | [Thr+Phe+Ahp+Phe+MePhe+Val]Asp+BA     | 0.8     |
| CP-Phe <sup>2</sup>   | CP 955   | 955.4327  | 938.4300  | 938.4276 | 0.0024 | 10.35 | [Thr+Phe+Ahp+Phe+diMeTyr+Val]Asp+Ac   | 0.7     |
| CP-Phe <sup>2</sup>   | CP 967   | 967.4691  | 950.4664  | 950.4644 | 0.0020 | 12.16 | [Thr+Phe+Ahp+Phe+MePhe+Leu]Asp+BA     |         |
| CP-Phe <sup>2</sup>   | CP 969b  | 969.4484  | 952.4457  | 952.4449 | 0.0008 | 10.60 | [Thr+Phe+Ahp+Phe+MeTyr+Val]Asp+BA     | 0.8     |
| CP-Phe <sup>2</sup>   | CP 981   | 981.4848  | 964.4820  | 964.4816 | 0.0004 | 12.89 | [Thr+Phe+Ahp+Phe+MePhe+Val]Asp+HA     | 1.5     |
| CP-Phe <sup>2</sup>   | CP 983   | 983.4640  | 966.4613  | 966.4612 | 0.0001 | 11.35 | [Thr+Phe+Ahp+Phe+diMeTyr+Val]Asp+BA   | 4.6     |
| CP-Phe <sup>2</sup>   | CP 997   | 997.4797  | 980.4770  | 980.4766 | 0.0004 | 11.08 | [Thr+Phe+Ahp+Phe+MeTyr+Val]Asp+HA     | 1.1     |
| CP-Phe <sup>2</sup>   | CP 1011  | 1011.4953 | 994.4926  | 994.4933 | 0.0007 | 12.64 | [Thr+Phe+Ahp+Phe+diMeTyr+Val]Asp+HA   | 0.3     |
| CP-Phe <sup>2</sup>   | CP 1025b | 1025.5110 | 1008.5083 | 1998.51  |        |       | [Thr+Phe+Ahp+Phe+MeTyr+Val]Asp+OA     |         |
| CP-Trp <sup>2</sup>   | CP 992d  | 992.4644  | 975.4616  | 975.4594 | 0.0022 | 11.88 | [Thr+Trp+Ahp+Phe+MePhe+Val]Asp+BA     |         |
| CP-Trp <sup>2</sup>   | CP 1036c | 1036.4906 | 1019.4878 | 1019.49  |        |       | [Thr+Trp+Ahp+Phe+MeTyr+Val]Asp+HA     |         |
| CP-Trp <sup>2</sup>   | CP 1050  | 1050.5062 | 1033.5035 | 1033.50  |        |       | [Thr+Trp+Ahp+Phe+diMeTyr+Val]Asp+HA   |         |
| CP-Tyr <sup>2</sup>   | CP 929   | 929.4171  | 912.4144  | 912.4266 | 0.0122 | 4.84  | [Thr+Tyr+Ahp+Phe+diMeTyr+Val]Asp      |         |
| CP-Tyr <sup>2</sup>   | CP 941   | 941.4171  | 924.4144  | 924.4140 | 0.0004 | 9.68  | [Thr+Tyr+Ahp+Phe+MePhe+Val]Asp+Ac     | 3.4     |
| CP-Tyr <sup>2</sup>   | CP 957   | 957.4120  | 940.4093  | 940.4080 | 0.0013 | 7.63  | [Thr+Tyr+Ahp+Phe+MeTyr+Val]Asp+Ac     | 0.6     |
| CP-Tyr <sup>2</sup>   | CP 965   | 965.4746  | 948.4719  | 948.4693 | 0.0026 | 2.56  | [Thr+Tyr+Ahp+Leu+diMeTyr+Val]Asp+BA   |         |
| CP-Tyr <sup>2</sup>   | CP 969   | 969.4484  | 952.4457  | 952.4449 | 0.0008 | 10.60 | [Thr+Tyr+Ahp+Phe+MePhe+Val]Asp+BA     | 1.6 [8] |
| CP-Tyr <sup>2</sup>   | CP 971   | 971.4277  | 954.4249  | 954.4252 | 0.0003 | 9.44  | [Thr+Tyr+Ahp+Phe+diMeTyr+Val]Asp+Ac   | 0.7     |
| CP-Tyr <sup>2</sup>   | CP 983b  | 983.4640  | 966.4613  | 966.46   |        |       | [Thr+Tyr+Ahp+Phe+MePhe+Leu]Asp+BA     |         |
| CP-Tyr <sup>2</sup>   | CP 983c  | 983.4640  | 966.4613  | 966.46   |        |       | [Thr+Tyr+Ahp+Phe+MePhe+Val]Glu+BA     |         |
| CP-Tyr <sup>2</sup>   | CP 985   | 985.4433  | 968.4406  | 968.4396 | 0.0010 | 8.65  | [Thr+Tyr+Ahp+Phe+MeTyr+Val]Asp+BA     | 3.1 [8] |
| CP-Tyr <sup>2</sup>   | CP 993   | 993.5059  | 976.5032  | 976.50   |        |       | [Thr+Tyr+Ahp+Leu+diMeTyr+Val]Asp+HA   |         |
| CP-Tyr <sup>2</sup>   | CP 997b  | 997.4797  | 980.4770  | 980.4764 | 0.0005 | 11.84 | [Thr+Tyr+Ahp+Phe+MePhe+Val]Asp+HA     | 2.6     |
| CP-Tyr <sup>2</sup>   | CP 999   | 999.4590  | 982.4562  | 982.4555 | 0.0007 | 10.36 | [Thr+Tyr+Ahp+Phe+diMeTyr+Val]Asp+BA   | 8.1 [8] |
| CP-Tyr <sup>2</sup>   | CP 999b  | 999.4590  | 982.4562  | 982.4537 | 0.0025 | 9.22  | [Thr+Tyr+Ahp+Phe+MeTyr+Leu]Asp+BA     |         |
| CP-Tyr <sup>2</sup>   | CP 999c  | 999.4590  | 982.4562  | 982.46   |        |       | [Thr+Tyr+Ahp+Phe+MeTyr+Val]Glu+HA     |         |
| CP-Tyr <sup>2</sup>   | CP 1011b | 1011.4953 | 994.4926  | 994.4917 | 0.0009 | 7.30  | [Thr+Tyr+Ahp+Phe+MePhe+Leu]Asp+HA     |         |
| CP-Tyr <sup>2</sup>   | CP 1013b | 1013.3746 | 996.3719  | 996.37   |        |       | [Thr+Tyr+Ahp+Phe+diMeTyr+Leu]Asp+BA   |         |
| CP-Tyr <sup>2</sup>   | CP 1013  | 1013.4746 | 996.4719  | 996.4699 | 0.0020 | 10.04 | [Thr+Tyr+Ahp+Phe+MeTyr+Val]Asp+HA     | 2.8 [8] |
| CP-Tyr <sup>2</sup>   | CP 1013c | 1013.4746 | 996.4719  | 996.4702 | 0.0017 | 11.35 | [Thr+Tyr+Ahp+Phe+diMeTyr+Val]Glu+BA   |         |
| CP-Tyr <sup>2</sup>   | CP 1016  | 1016.0100 | 999.0072  | 999.0346 | 0.0274 | 12.72 | [Thr+Tyr+Ahp+Phe+diMe,OTyr+Val]Asp+BA |         |

|                     |          |           |           |           |        |       |                                     |     |     |
|---------------------|----------|-----------|-----------|-----------|--------|-------|-------------------------------------|-----|-----|
| CP-Tyr <sup>2</sup> | CP 1025  | 1025.5110 | 1008.5083 | 1008.5080 | 0.0002 | 13.24 | [Thr+Tyr+Ahp+Phe+MePhe+Val]Asp+OA   | 0.2 | [8] |
| CP-Tyr <sup>2</sup> | CP 1027  | 1027.4903 | 1010.4875 | 1010.4869 | 0.0006 | 11.61 | [Thr+Tyr+Ahp+Phe+diMeTyr+Val]Asp+HA | 1.3 |     |
| CP-Tyr <sup>2</sup> | CP 1036b | 1036.4906 | 1019.4878 | 1019.4445 | 0.0433 | 8.64  | [Thr+Tyr+Ahp+Phe+MeTrp+Val]Asp+HA   |     |     |
| CP-Tyr <sup>2</sup> | CP 1041  | 1041.5059 | 1024.5032 | 1024.5038 | 0.0006 | 11.53 | [Thr+Tyr+Ahp+Phe+MeTyr+Val]Asp+OA   |     |     |
| CP-Tyr <sup>2</sup> | CP 1053  | 1053.5423 | 1036.5396 | 1036.54   |        |       | [Thr+Tyr+Ahp+Phe+MePhe+Val]Asp+DA   |     |     |
| CP-Tyr <sup>2</sup> | CP 1055  | 1055.5216 | 1038.5188 | 1038.5183 | 0.0005 | 12.99 | [Thr+Tyr+Ahp+Phe+diMeTyr+Val]Asp+OA | 1.4 |     |
| CP-Tyr <sup>2</sup> | CP 1069  | 1069.5372 | 1052.5345 | 1052.5350 | 0.0005 | 13.09 | [Thr+Tyr+Ahp+Phe+MeTyr+Val]Asp+DA   |     |     |
| CP-Tyr <sup>2</sup> | CP 1083  | 1083.5529 | 1066.5501 | 1066.5454 | 0.0047 | 8.47  | [Thr+Tyr+Ahp+Phe+diMeTyr+Val]Asp+DA |     |     |
| CP-Tyr <sup>2</sup> | CP 1097  | 1097.5685 | 1080.5658 | 1082.57   |        |       | [Thr+Tyr+Ahp+Phe+diMeTyr+Val]Glu+DA |     |     |

---

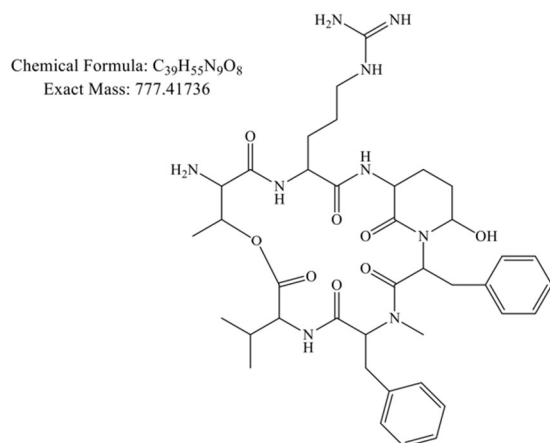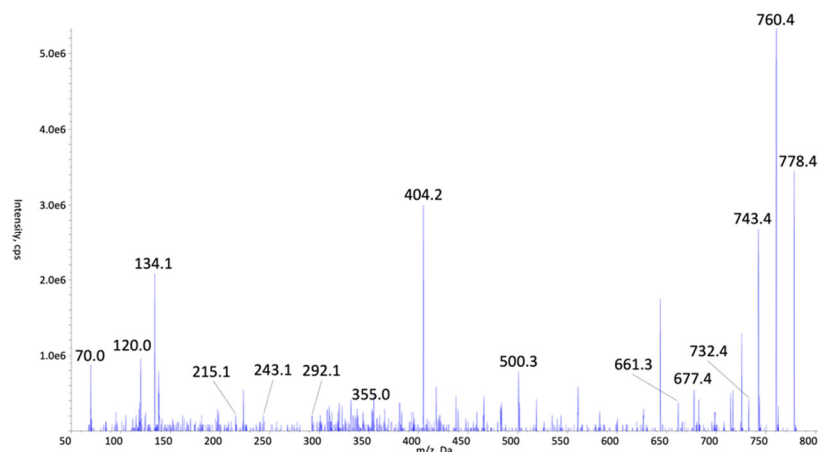

Figure S1. Structure and enhanced product ion mass spectrum of the cyanopeptolin CP 777.

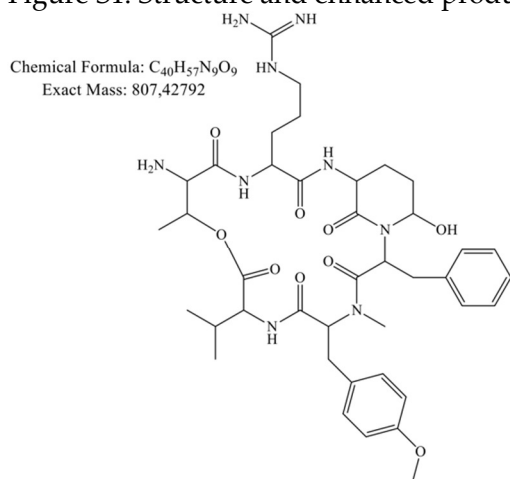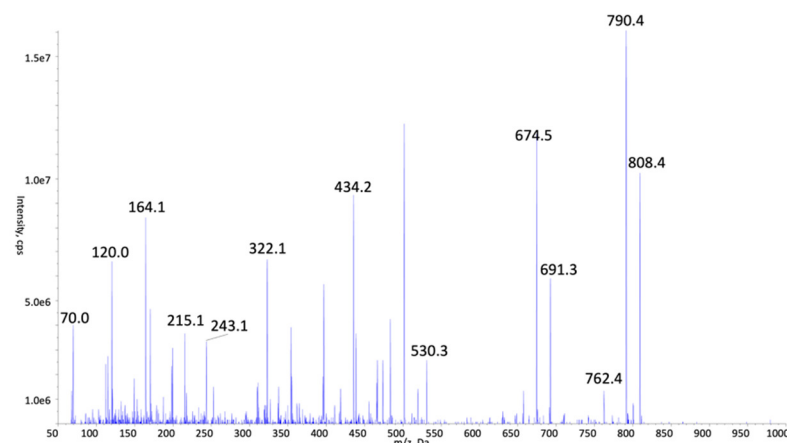

Figure S2. Structure and enhanced product ion mass spectrum of the cyanopeptolin CP 807.

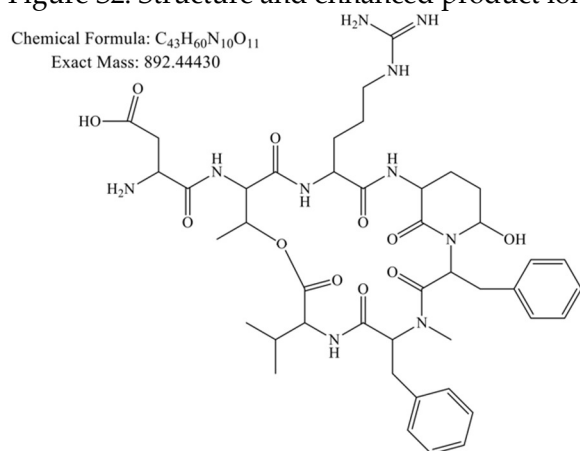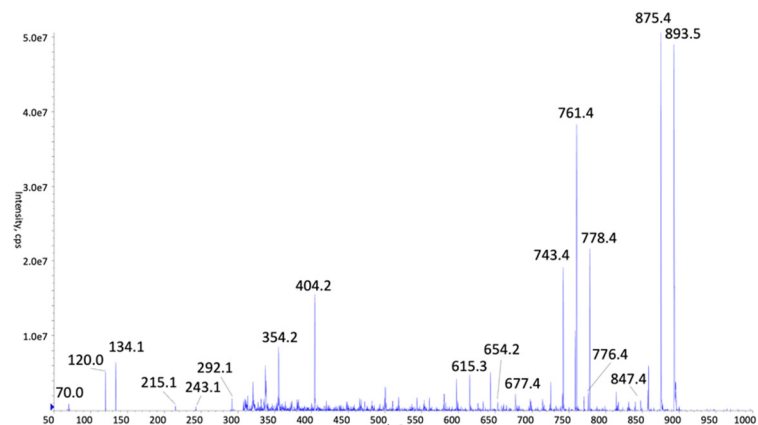

Figure S3. Structure and enhanced product ion mass spectrum of the cyanopeptolin CP 892.

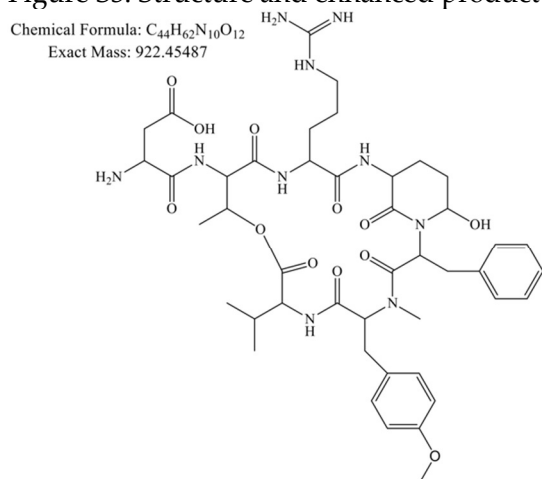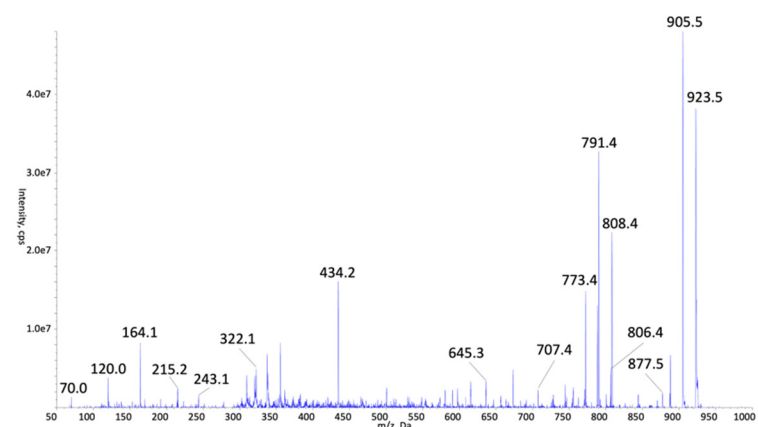

Figure S4. Structure and enhanced product ion mass spectrum of the cyanopeptolin CP 922.

Chemical Formula:  $C_{46}H_{63}N_9O_{12}$   
Molecular Weight: 934.04552

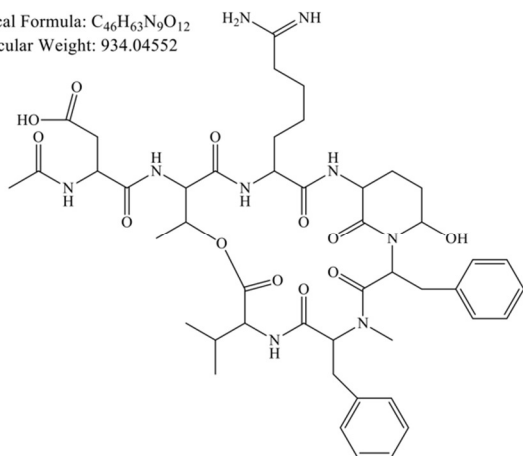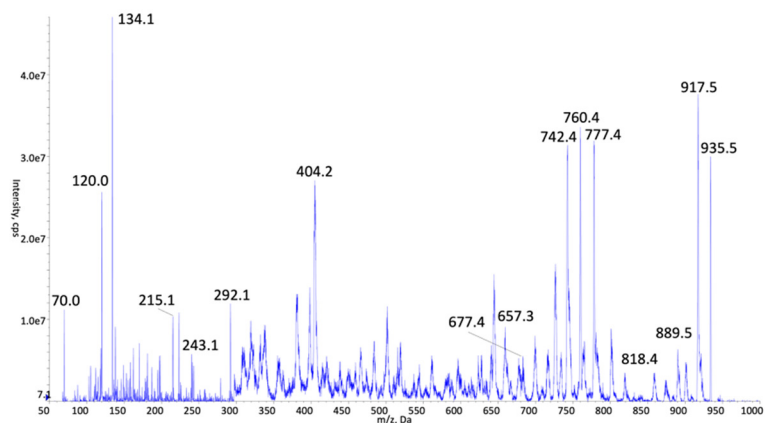

Figure S5. Structure and enhanced product ion mass spectrum of the cyanopeptolin CP 934.

Chemical Formula:  $C_{44}H_{68}N_{10}O_{13}$   
Exact Mass: 944.49673

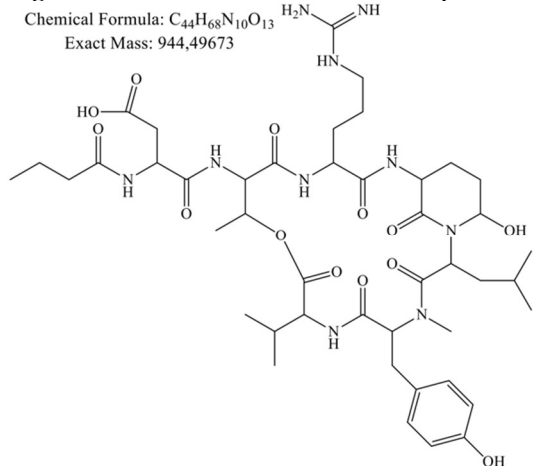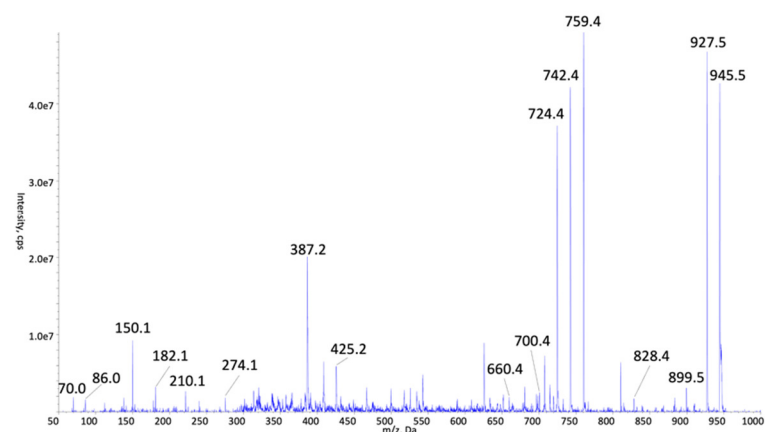

Figure S6. Structure and enhanced product ion mass spectrum of the cyanopeptolin CP 944.

Chemical Formula:  $C_{45}H_{62}N_{10}O_{13}$   
Exact Mass: 950.44978

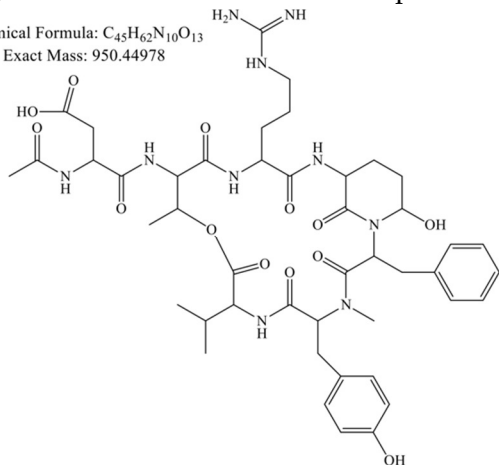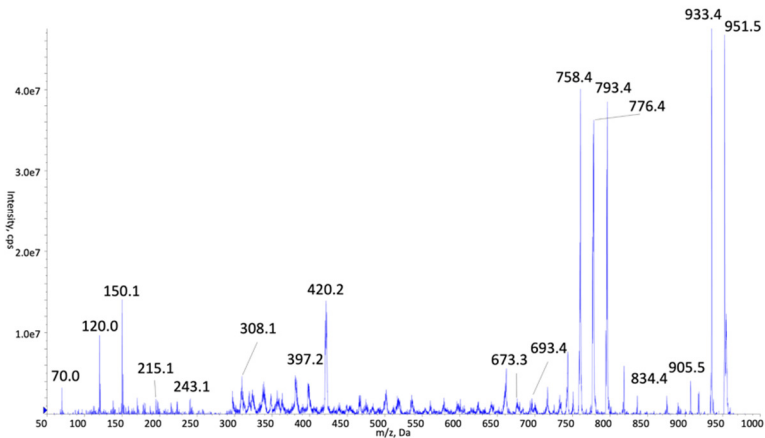

Figure S7. Structure and enhanced product ion mass spectrum of the cyanopeptolin CP 950.

Chemical Formula:  $C_{47}H_{66}N_{10}O_{12}$   
Exact Mass: 962.48617

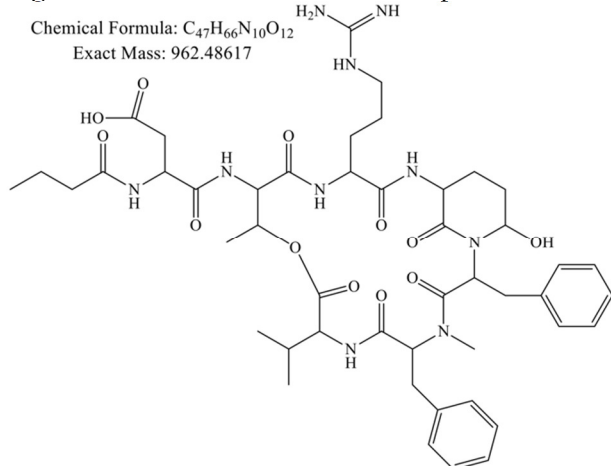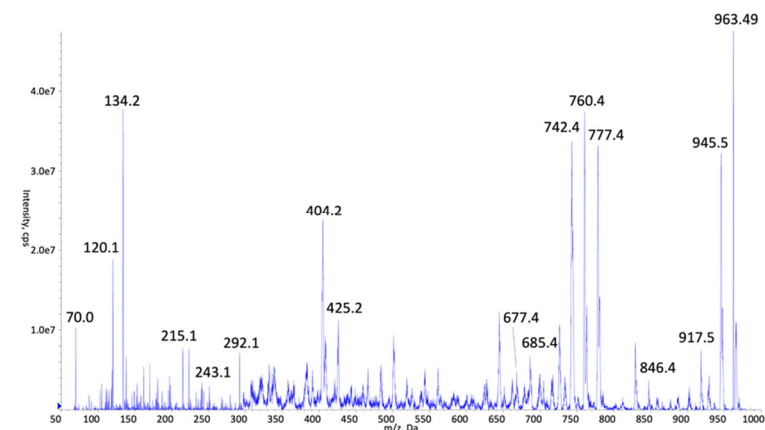

Figure S8. Structure and enhanced product ion mass spectrum of the cyanopeptolin CP 962 [8].

Chemical Formula:  $C_{46}H_{64}N_{10}O_{13}$   
Exact Mass: 964.46543

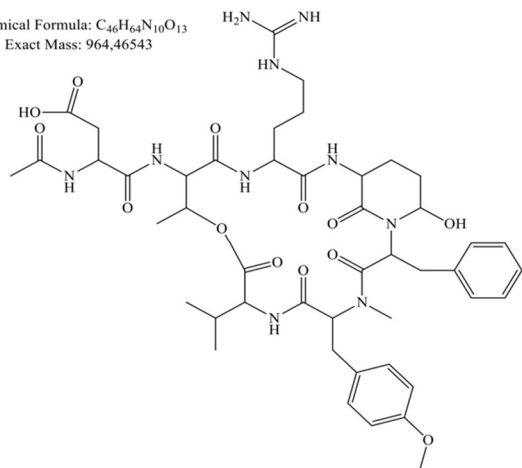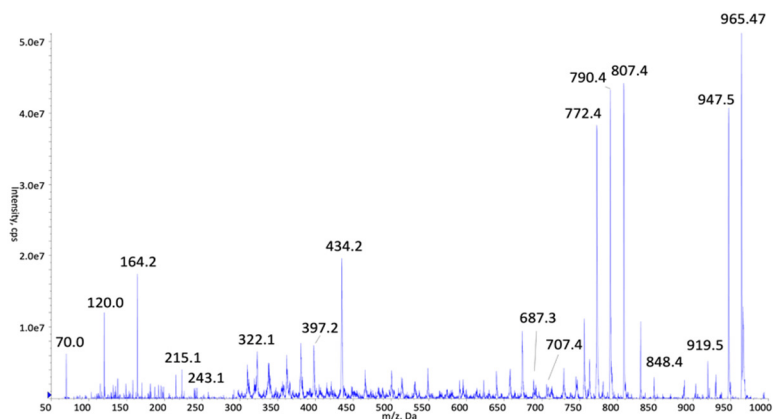

Figure S9. Structure and enhanced product ion mass spectrum of the cyanopeptolin CP 964.

Chemical Formula:  $C_{48}H_{68}N_{10}O_{12}$   
Exact Mass: 976.50182

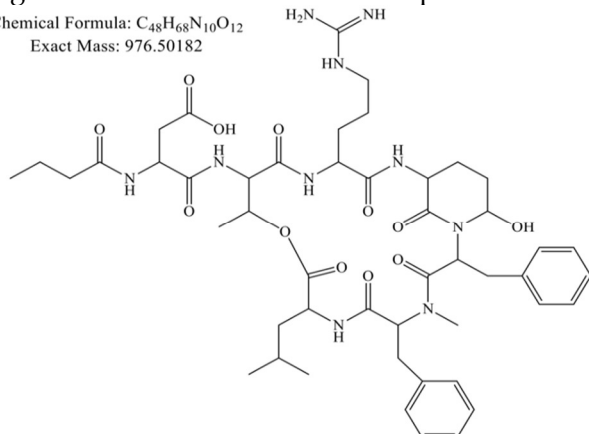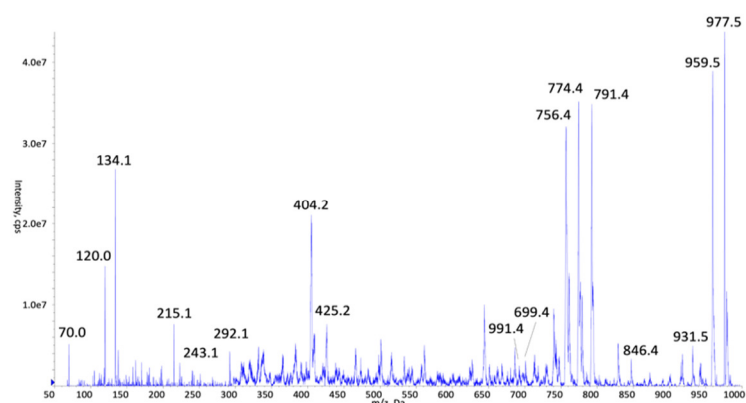

Figure S10. Structure and enhanced product ion mass spectrum of the cyanopeptolin CP 976.

Chemical Formula:  $C_{47}H_{66}N_{10}O_{13}$   
Exact Mass: 978.48108

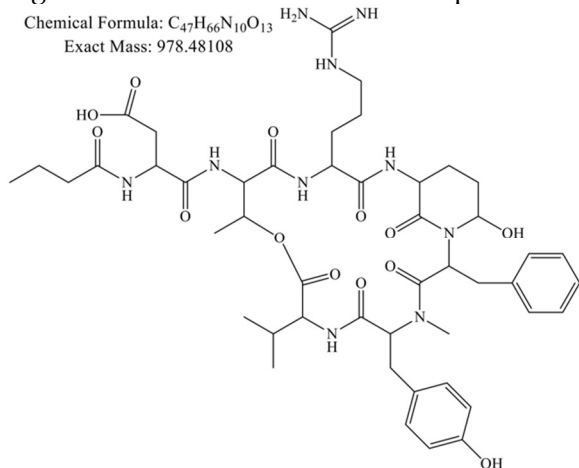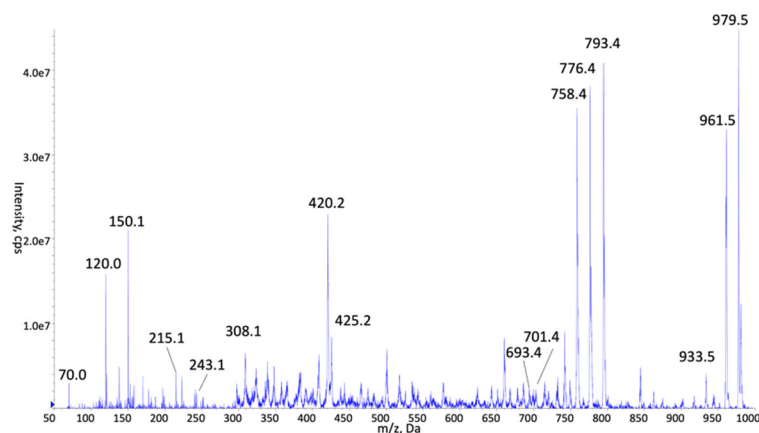

Figure S11. Structure and enhanced product ion mass spectrum of the cyanopeptolin CP 978 [8].

Chemical Formula:  $C_{48}H_{68}N_{10}O_{13}$   
Exact Mass: 992.49673

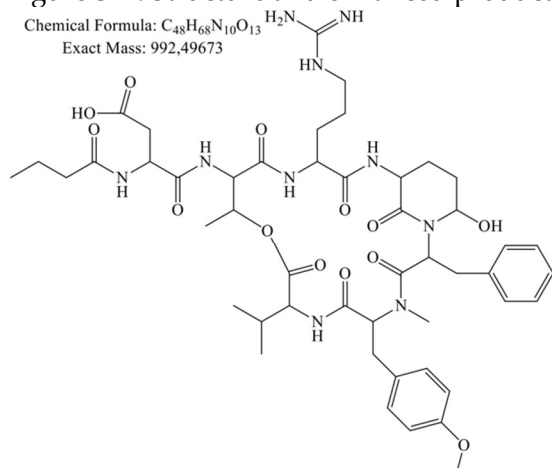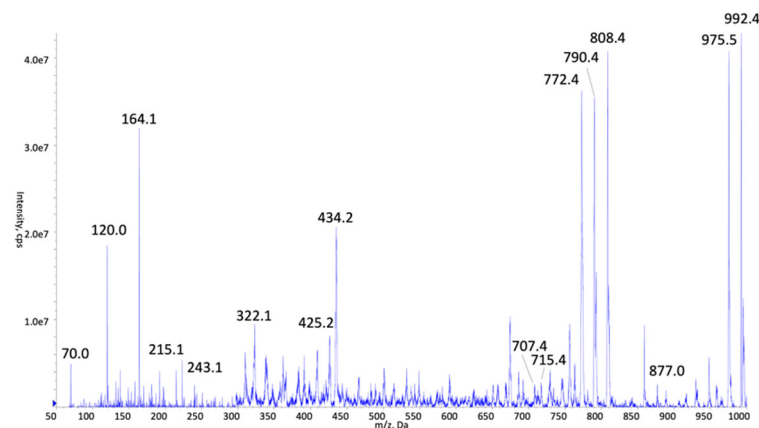

Figure S12. Structure and enhanced product ion mass spectrum of the cyanopeptolin CP 992 [8].

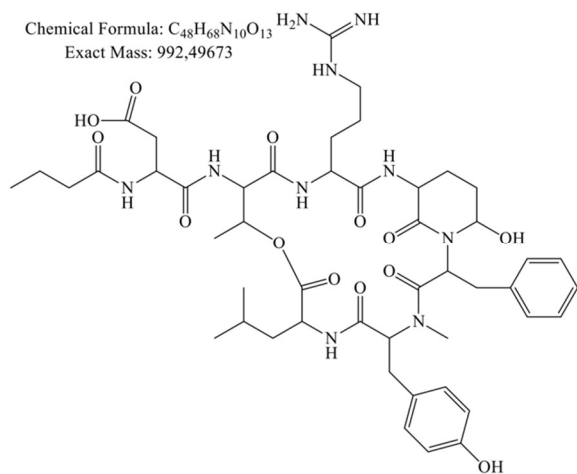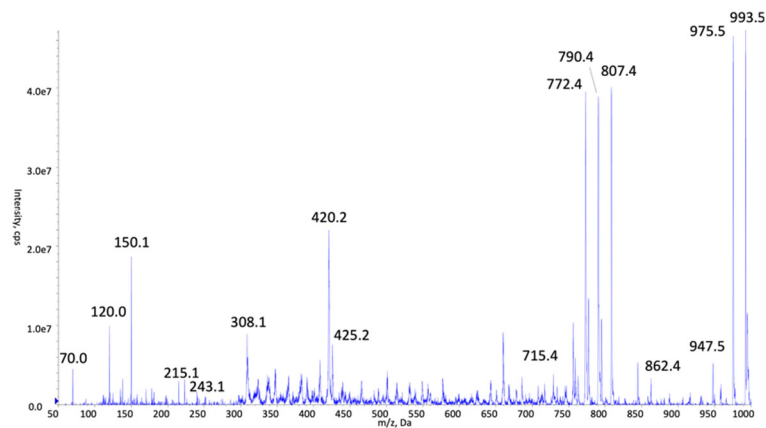

Figure S13. Structure and enhanced product ion mass spectrum of the cyanopeptolin CP 992b.

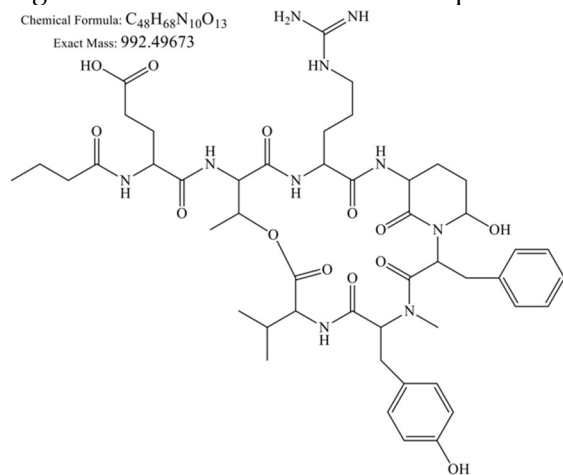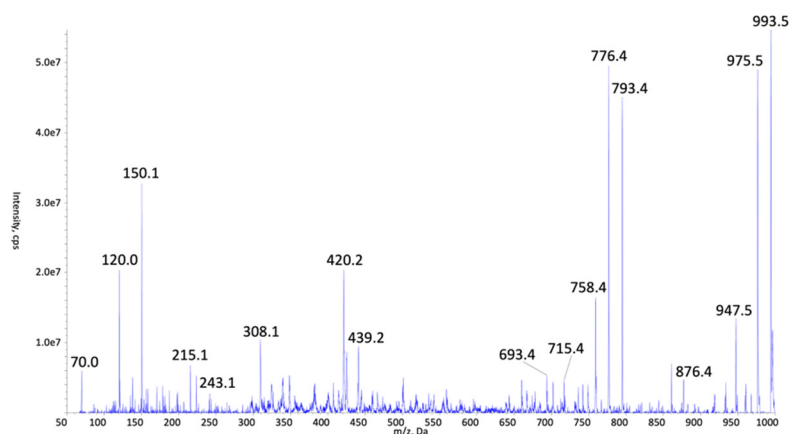

Figure S14. Structure and enhanced product ion mass spectrum of the cyanopeptolin CP 992c.

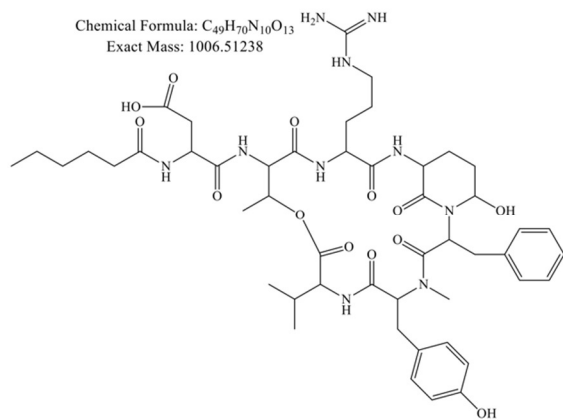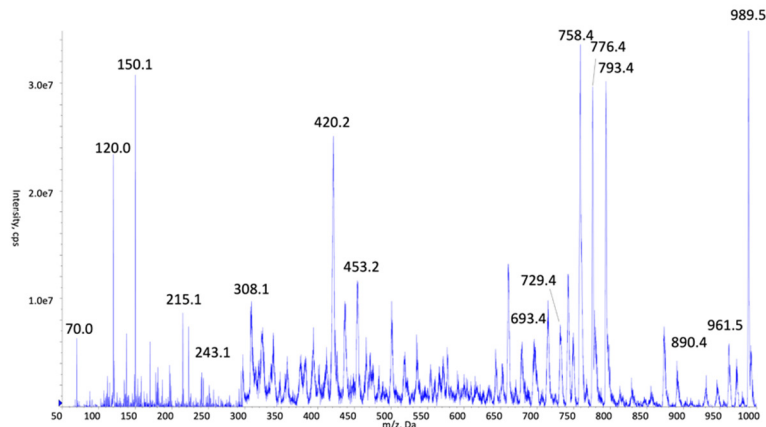

Figure S15. Structure and enhanced product ion mass spectrum of the cyanopeptolin CP 1006[8].

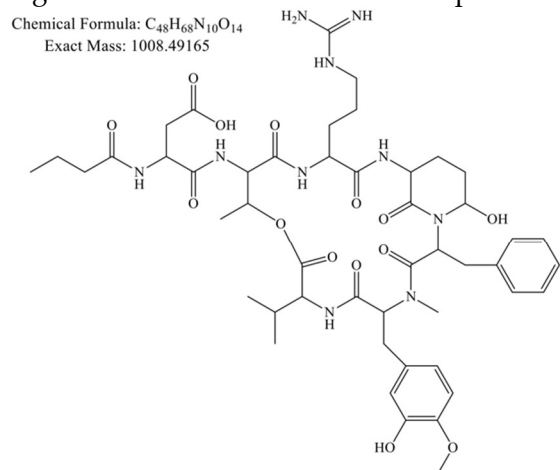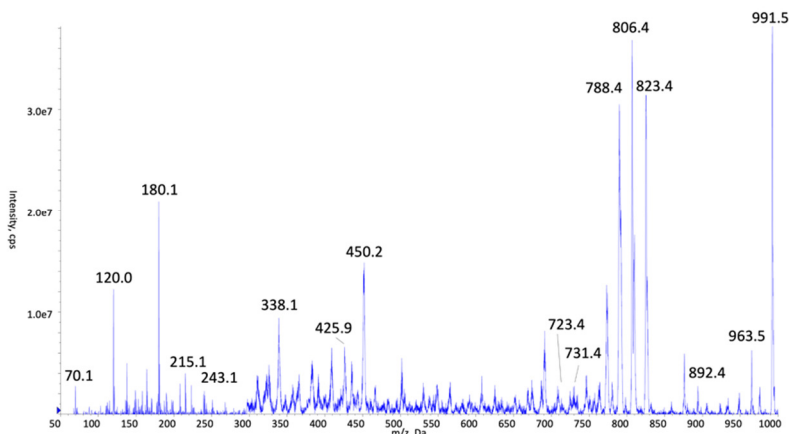

Figure S16. Structure and enhanced product ion mass spectrum of the cyanopeptolin CP 1008.

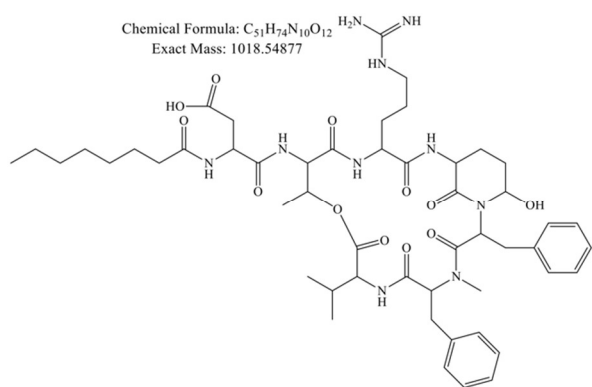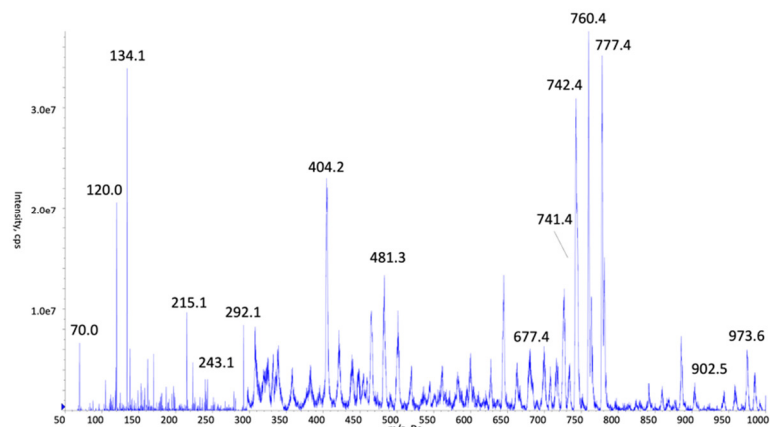

Figure S17. Structure and enhanced product ion mass spectrum of the cyanopeptolin CP 1018 [8].

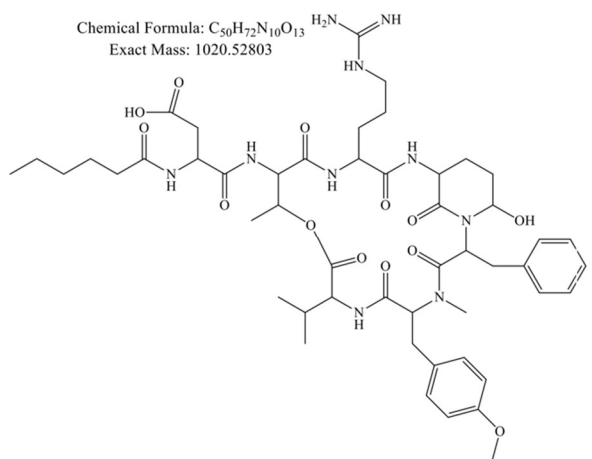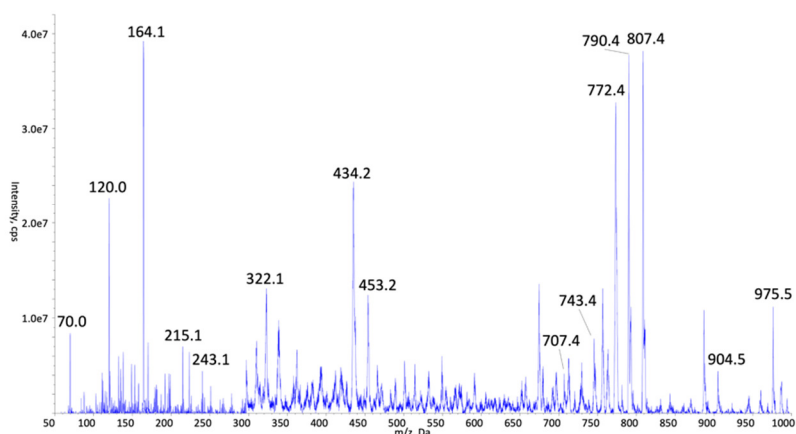

Figure S18. Structure and enhanced product ion mass spectrum of the cyanopeptolin CP 1020b [8].

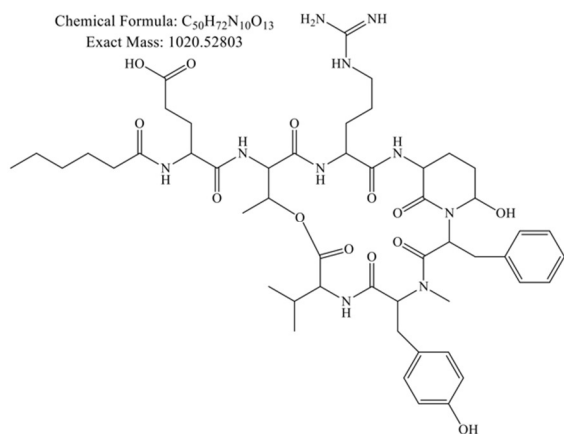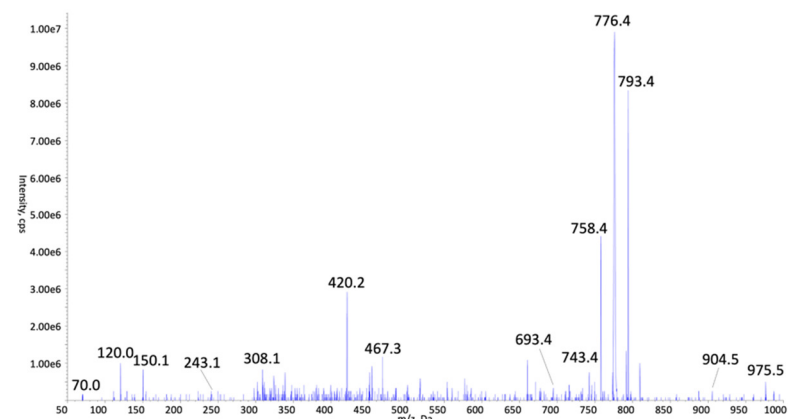

Figure S19. Structure and enhanced product ion mass spectrum of the cyanopeptolin CP 1020.

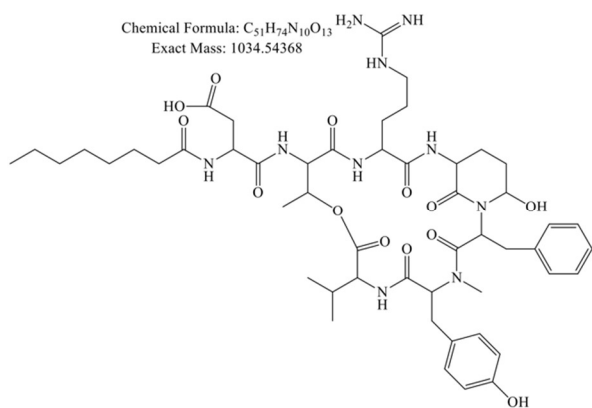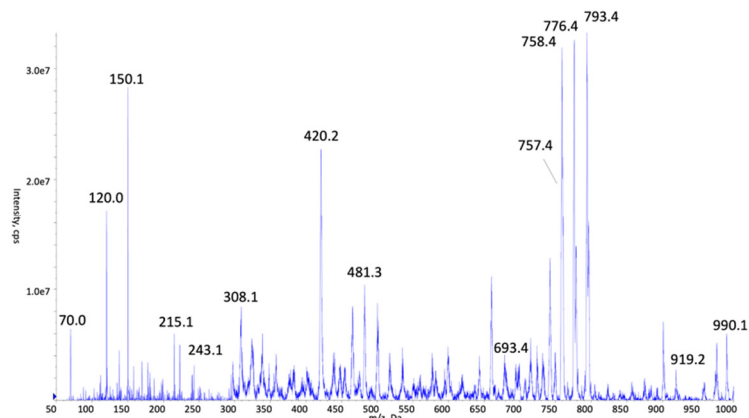

Figure S20. Structure and enhanced product ion mass spectrum of the cyanopeptolin CP 1034.



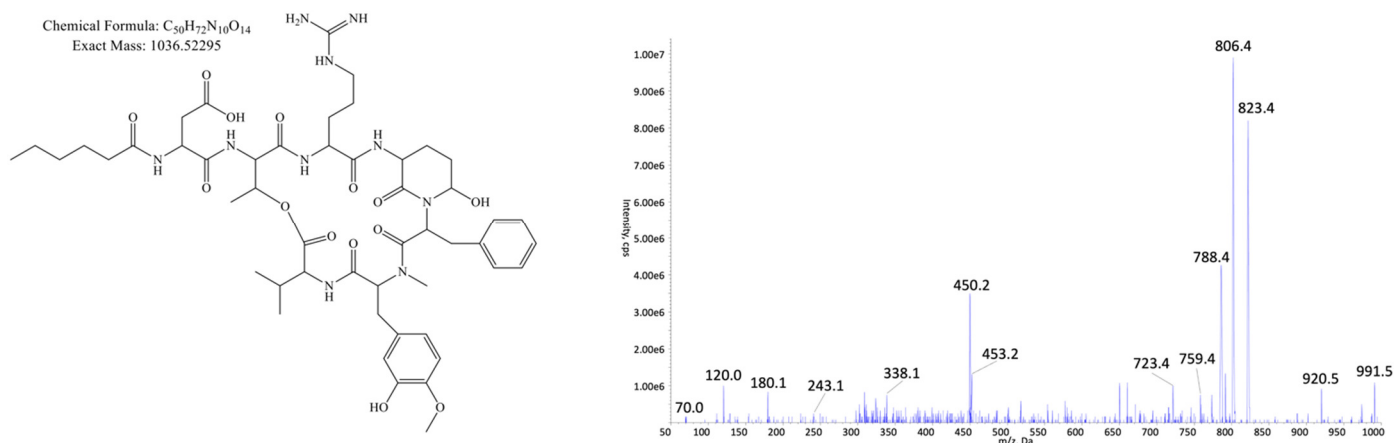

Figure S21. Structure and enhanced product ion mass spectrum of the cyanopeptolin CP 1036.

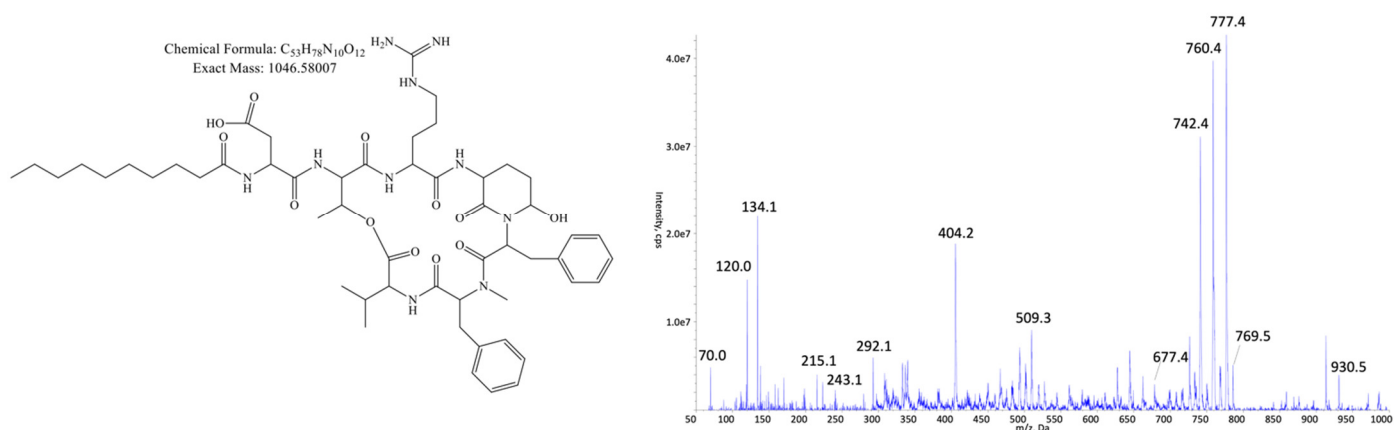

Figure S22. Structure and enhanced product ion mass spectrum of the cyanopeptolin CP 1046.

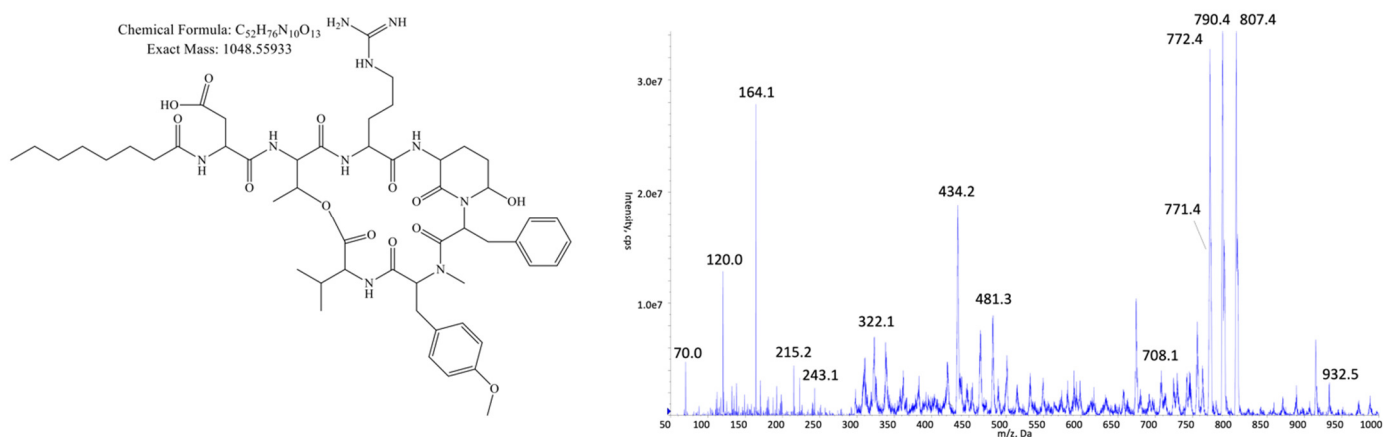

Figure S23. Structure and enhanced product ion mass spectrum of the cyanopeptolin CP 1048 [8].

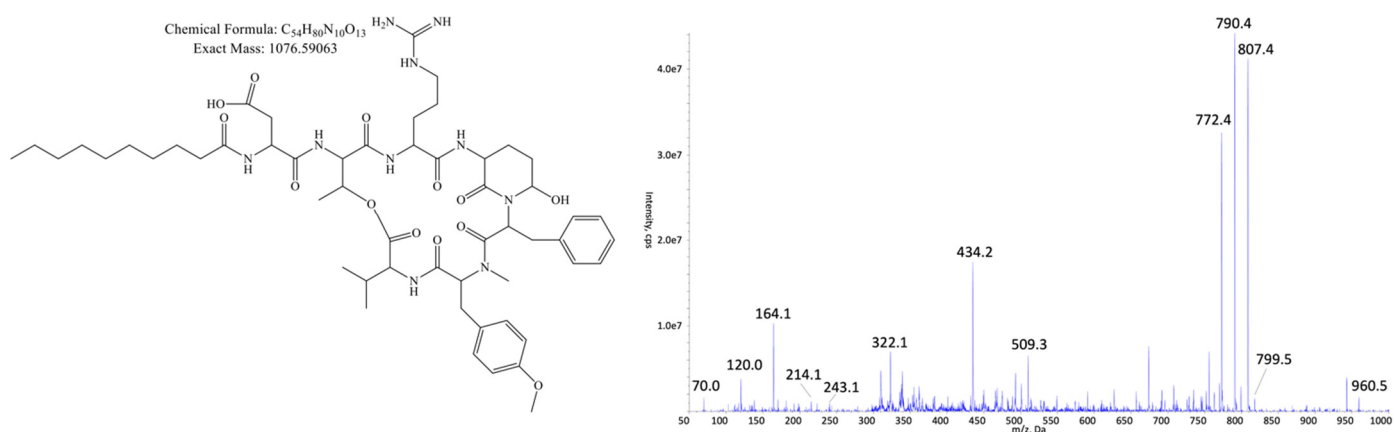

Figure S24. Structure and enhanced product ion mass spectrum of the cyanopeptolin CP 1076.



Chemical Formula:  $C_{45}H_{61}N_7O_{12}$   
Exact Mass: 891.43782

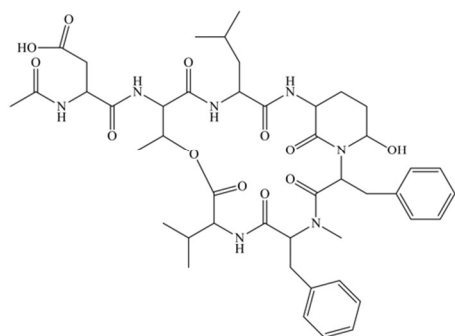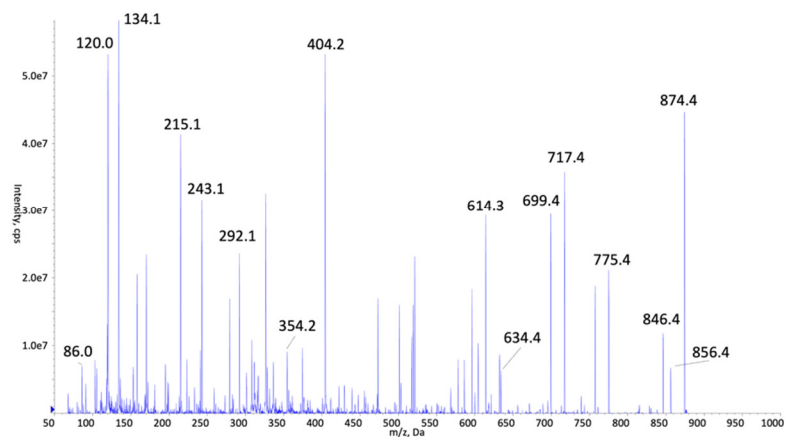

Figure S25. Structure and enhanced product ion mass spectrum of the cyanopeptolin CP 891.

Chemical Formula:  $C_{45}H_{61}N_7O_{13}$   
Exact Mass: 907.43274

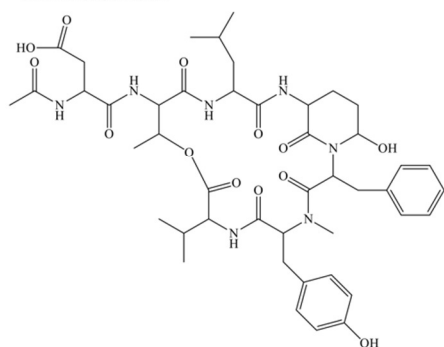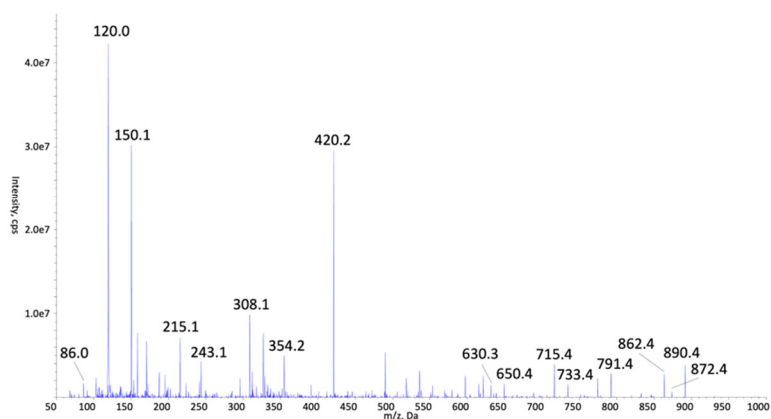

Figure S26. Structure and enhanced product ion mass spectrum of the cyanopeptolin CP 907.

Chemical Formula:  $C_{46}H_{63}N_7O_{13}$   
Exact Mass: 921.44839

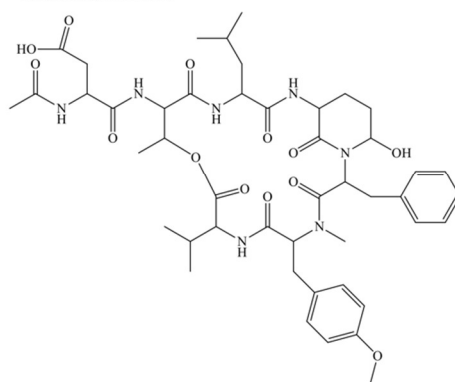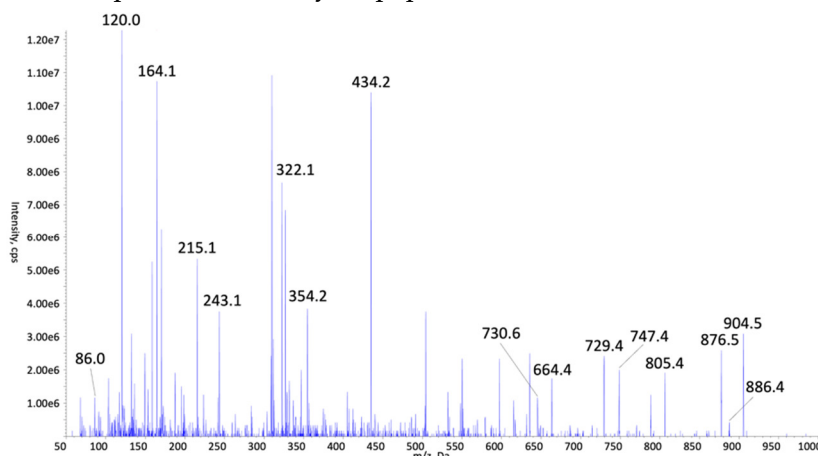

Figure S27. Structure and enhanced product ion mass spectrum of the cyanopeptolin CP 921.

Chemical Formula:  $C_{48}H_{67}N_7O_{12}$   
Exact Mass: 933.48477

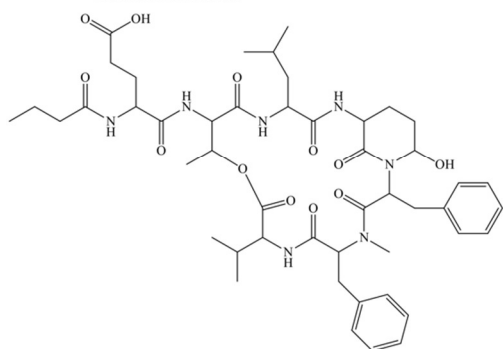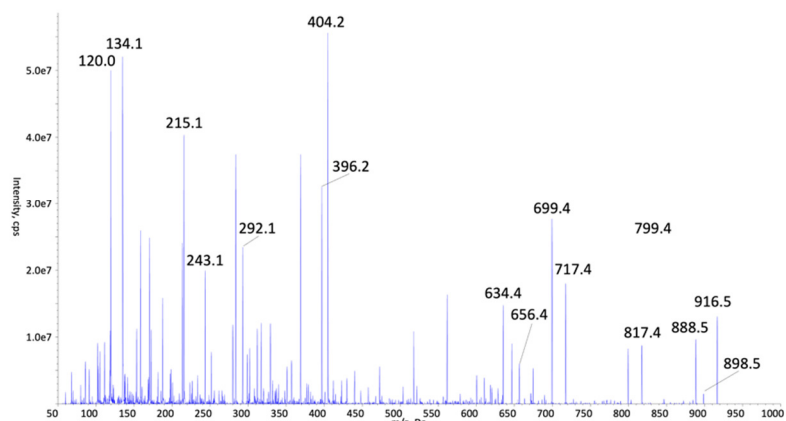

Figure S28. Structure and enhanced product ion mass spectrum of the cyanopeptolin CP 933.

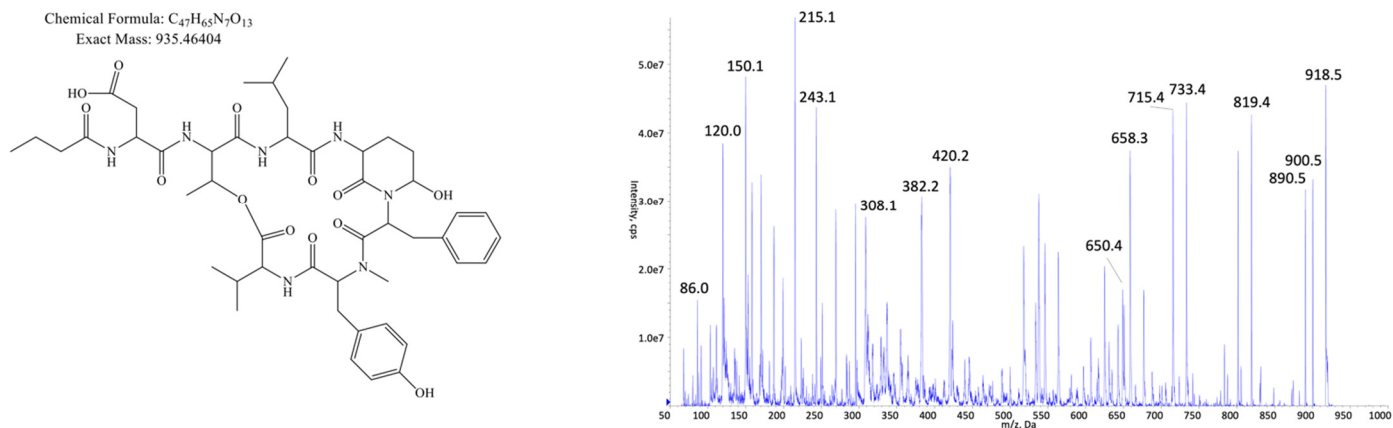

Figure S29. Structure and enhanced product ion mass spectrum of the cyanopeptolin CP 935.

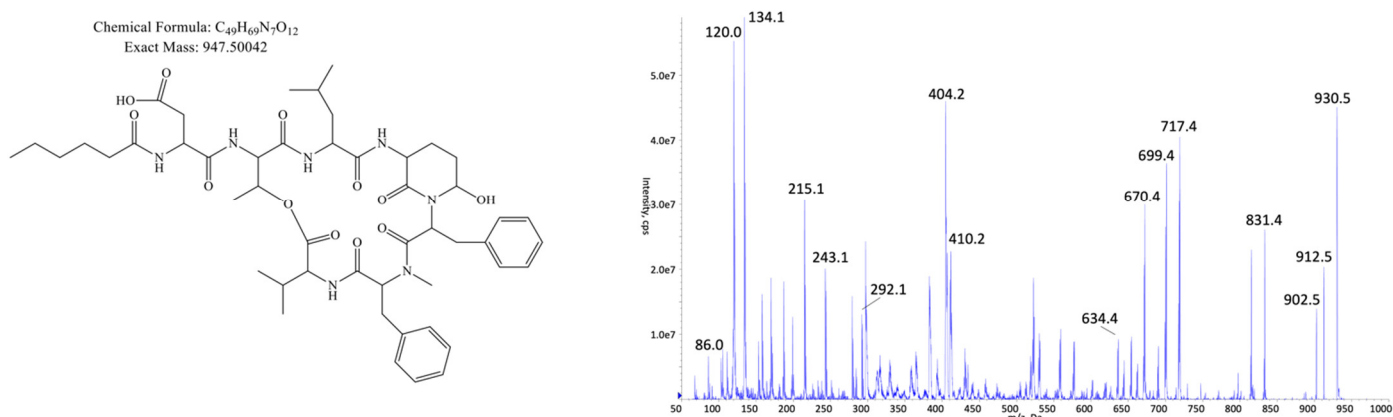

Figure S30. Structure and enhanced product ion mass spectrum of the cyanopeptolin CP 947.

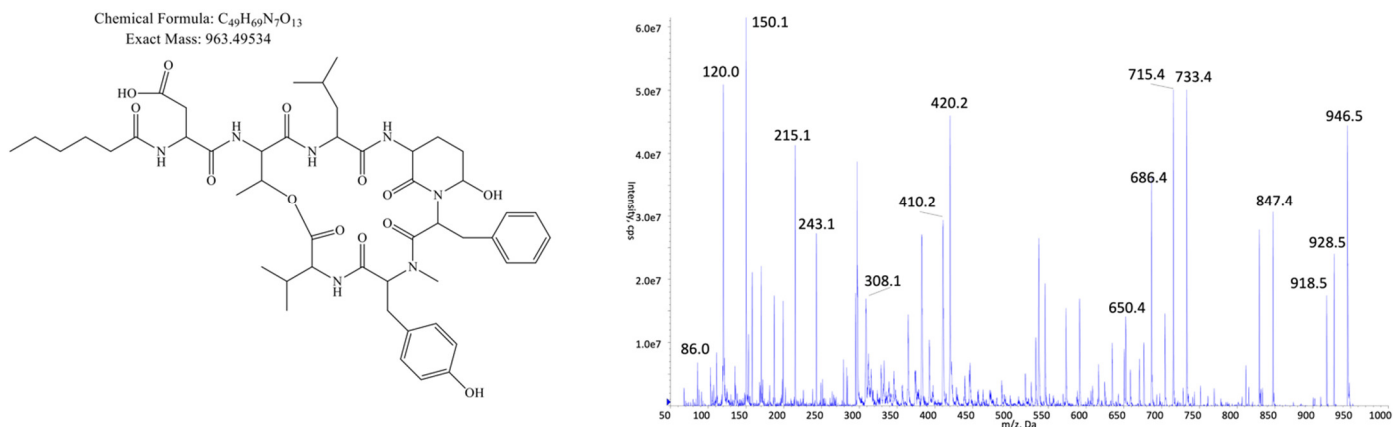

Figure S31. Structure and enhanced product ion mass spectrum of the cyanopeptolin CP 963.

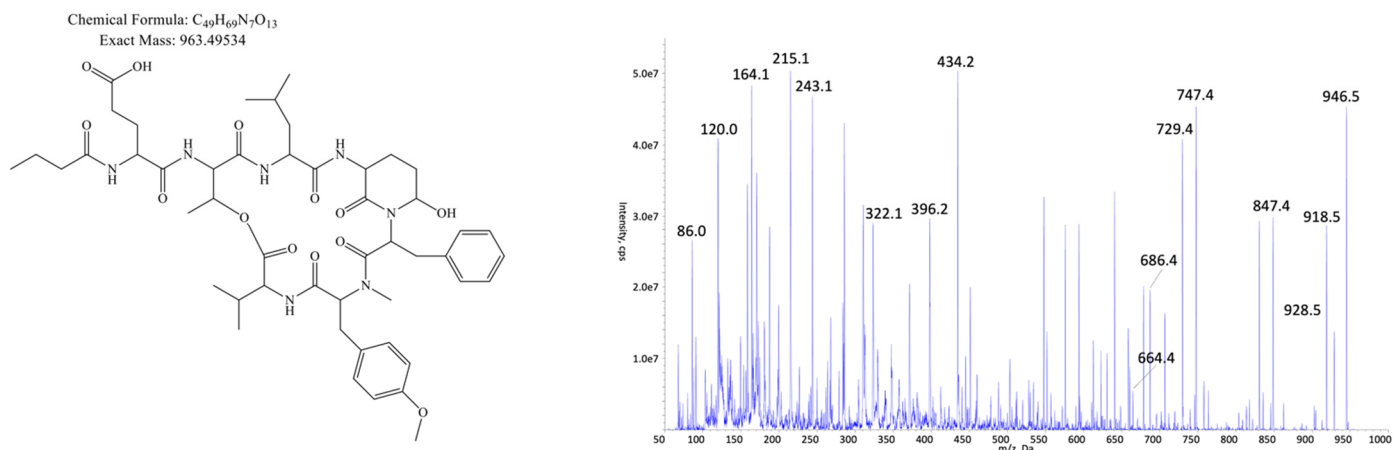

Figure S32. Structure and enhanced product ion mass spectrum of the cyanopeptolin CP 963b.

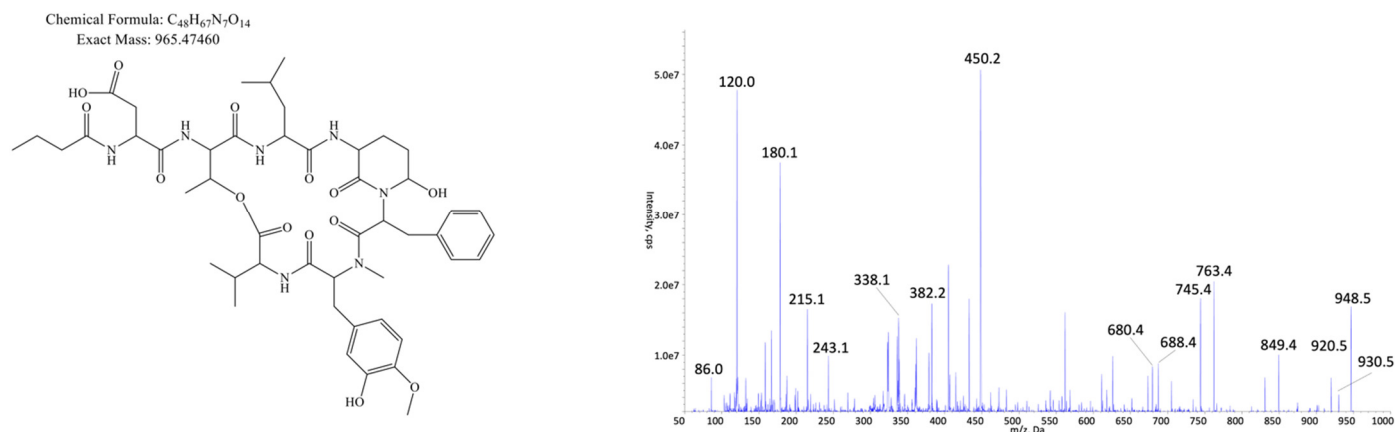

Figure S33. Structure and enhanced product ion mass spectrum of the cyanopeptolin CP 965b.

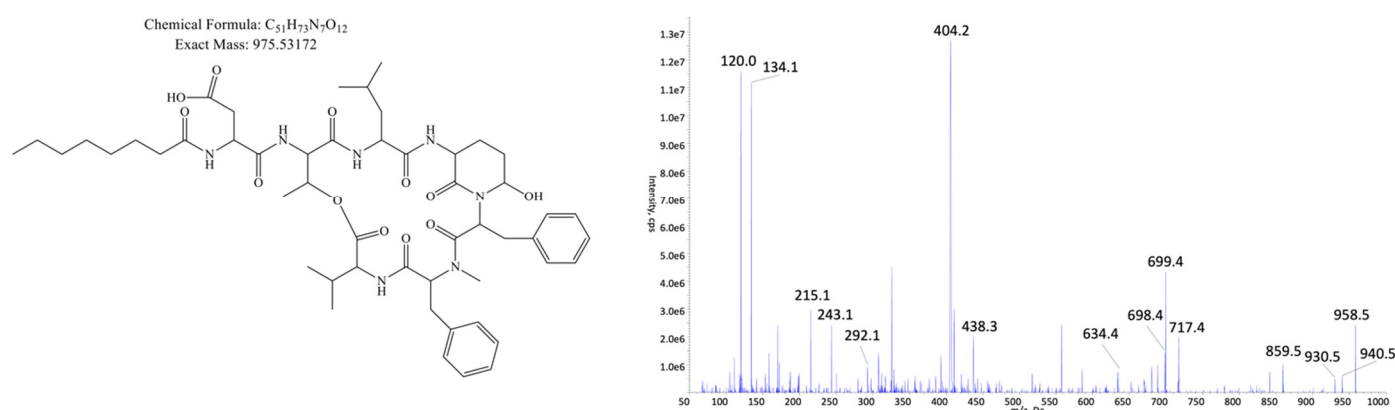

Figure S34. Structure and enhanced product ion mass spectrum of the cyanopeptolin CP 975.

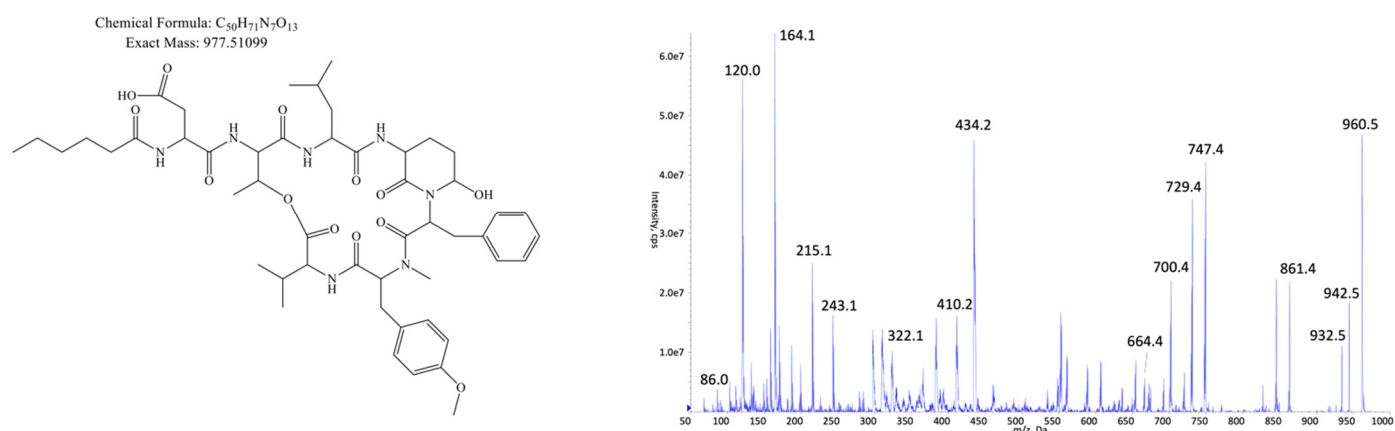

Figure S35. Structure and enhanced product ion mass spectrum of the cyanopeptolin CP 977.

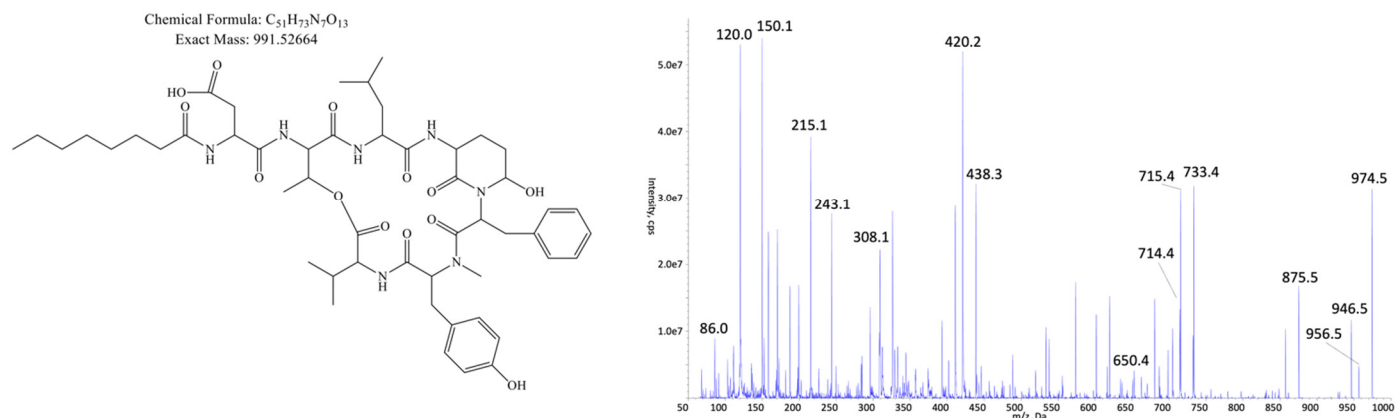

Figure S36. Structure and enhanced product ion mass spectrum of the cyanopeptolin CP 991.

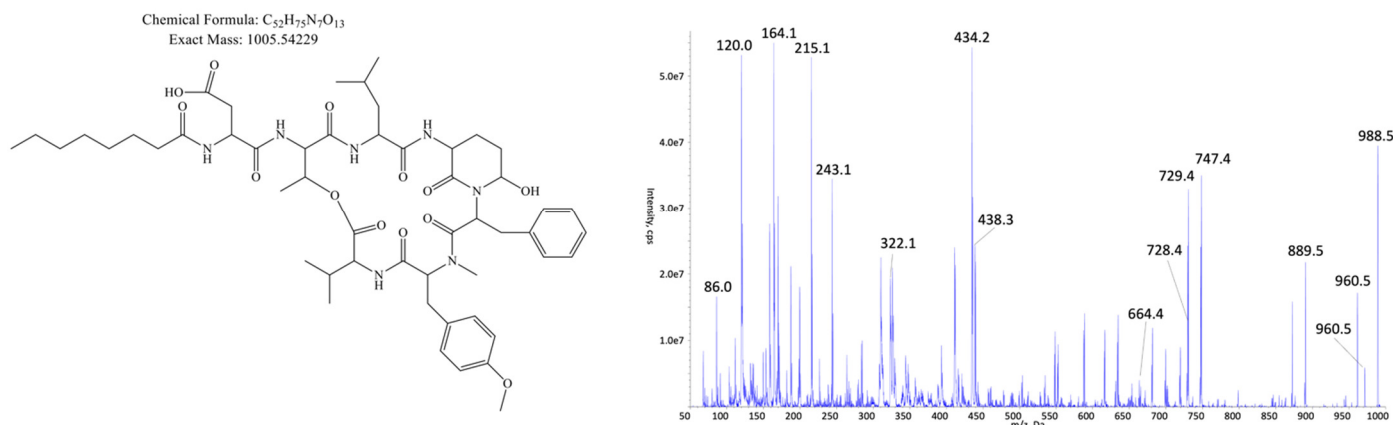

Figure S37. Structure and enhanced product ion mass spectrum of the cyanopeptolin CP 1005.

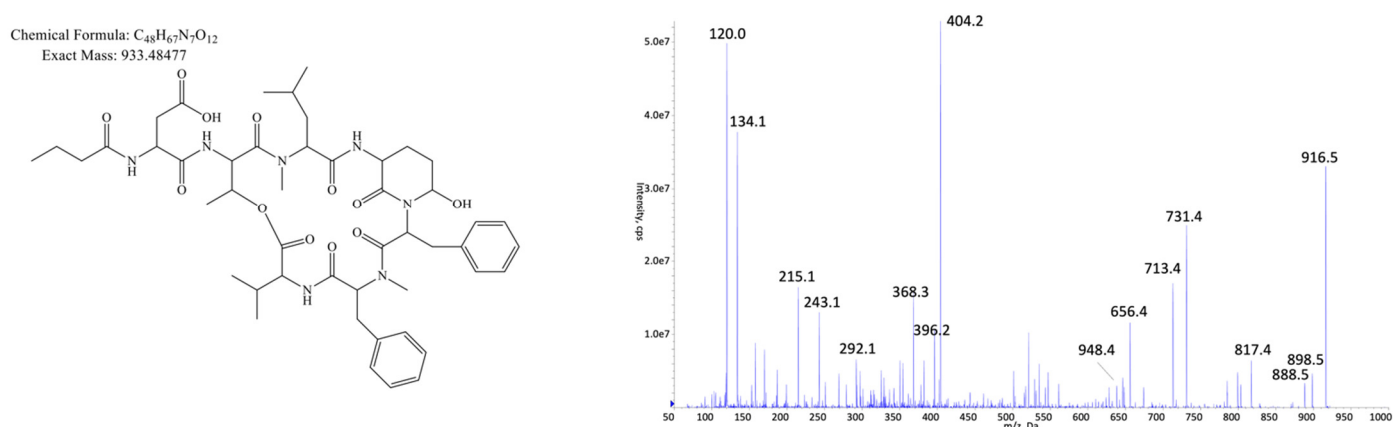

Figure S38. Structure and enhanced product ion mass spectrum of the cyanopeptolin CP 933b.

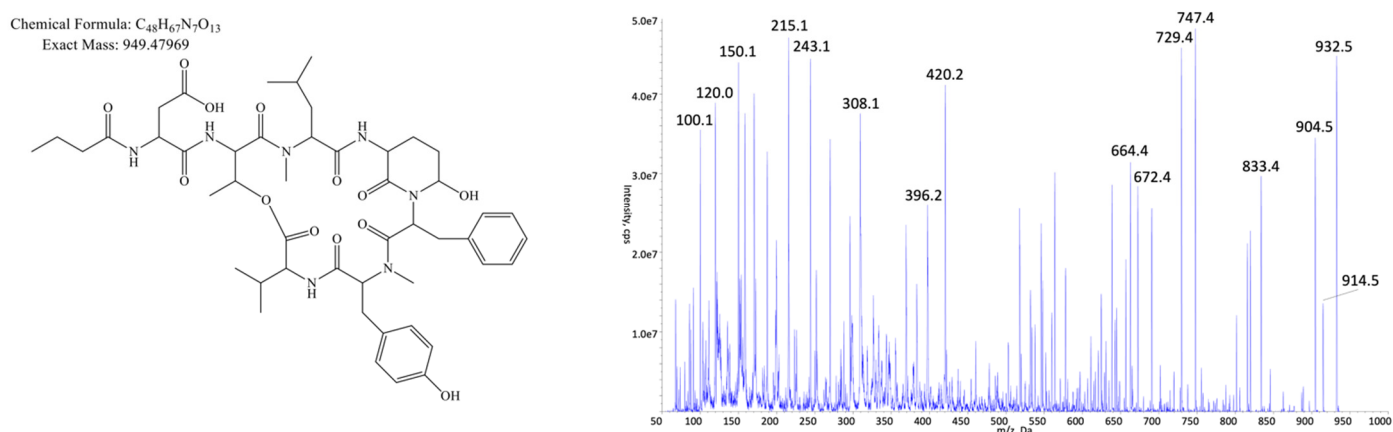

Figure S39. Structure and enhanced product ion mass spectrum of the cyanopeptolin CP 949b.

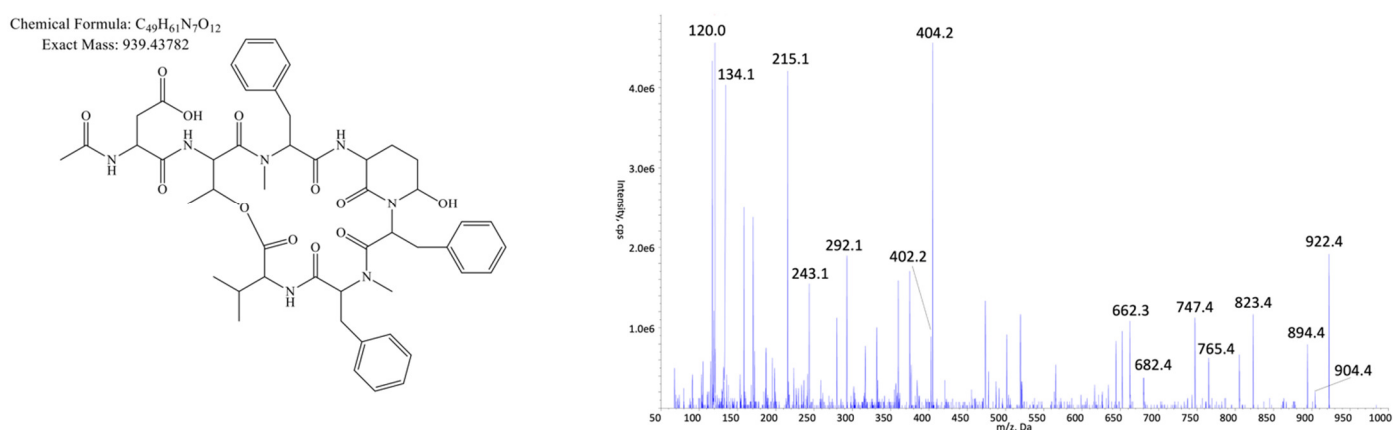

Figure S40. Structure and enhanced product ion mass spectrum of the cyanopeptolin CP 939b.

Chemical Formula:  $C_{51}H_{65}N_7O_{12}$   
Exact Mass: 967.46912

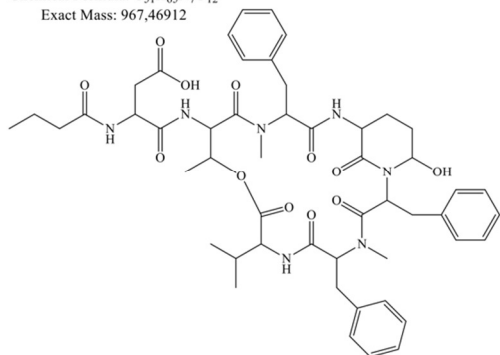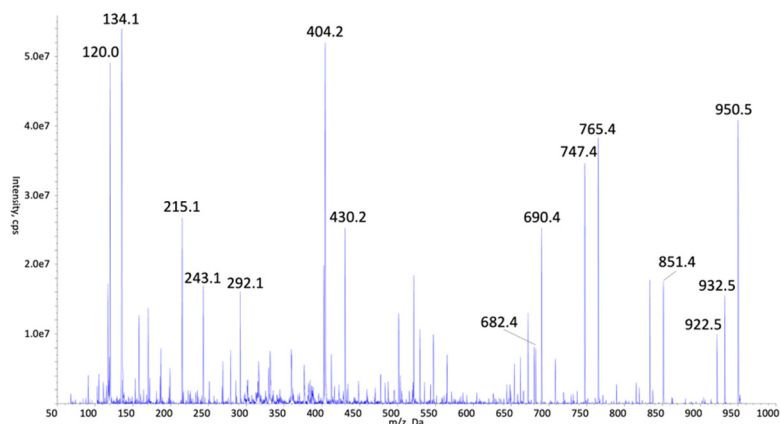

Figure S41. Structure and enhanced product ion mass spectrum of the cyanopeptolin CP 967b.

Chemical Formula:  $C_{53}H_{69}N_7O_{13}$   
Exact Mass: 1011.49534

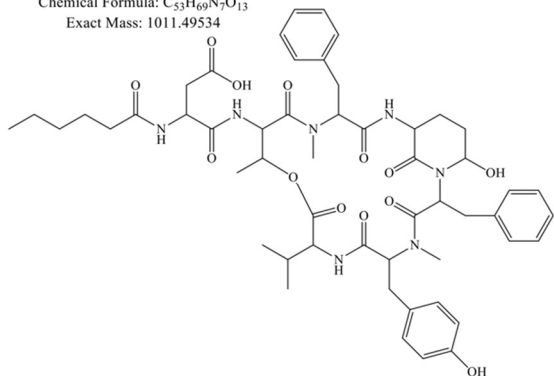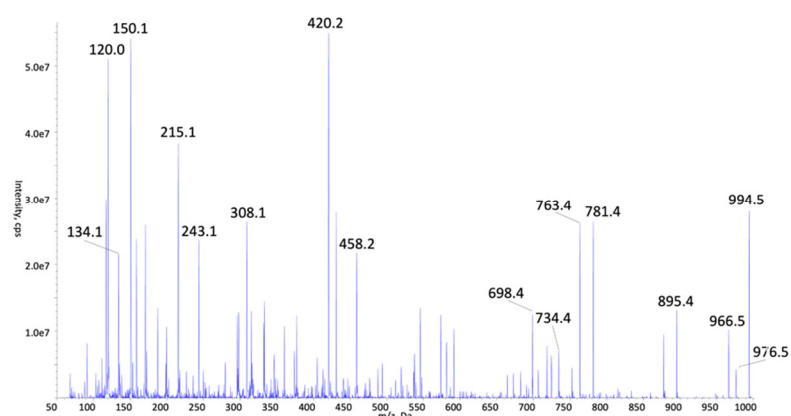

Figure S42. Structure and enhanced product ion mass spectrum of the cyanopeptolin CP 1011c.

Chemical Formula:  $C_{46}H_{63}N_7O_{12}S$   
Exact Mass: 937.42554

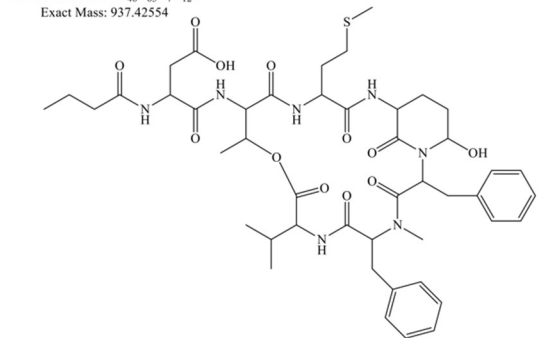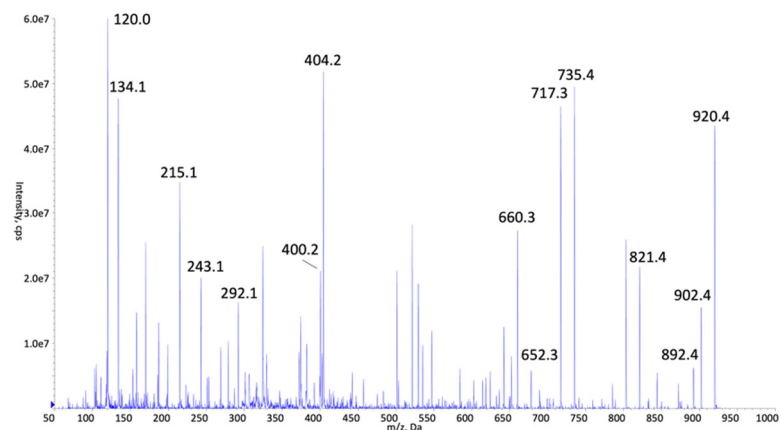

Figure S43. Structure and enhanced product ion mass spectrum of the cyanopeptolin CP 937.

Chemical Formula:  $C_{45}H_{61}N_7O_{13}S$   
Exact Mass: 939.40481

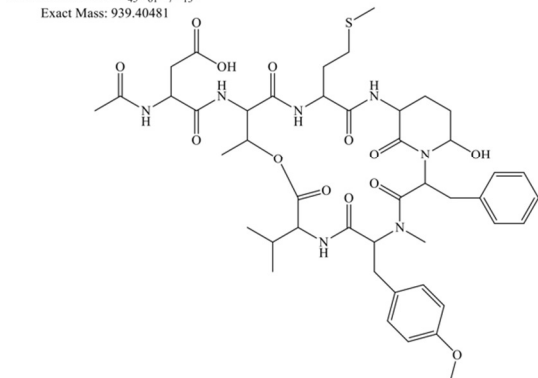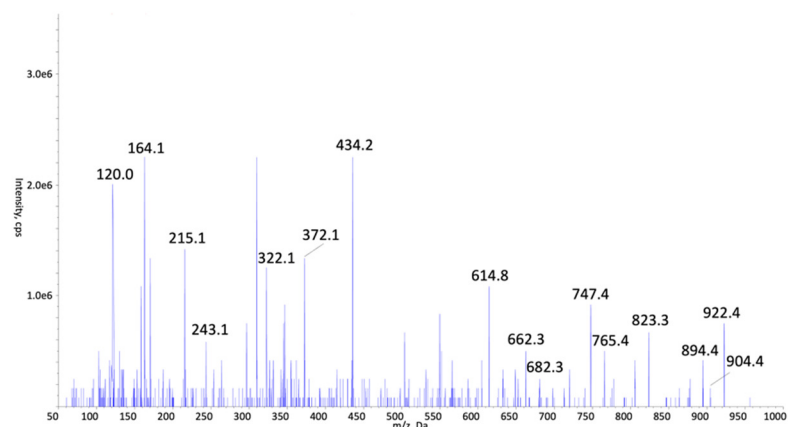

Figure S44. Structure and enhanced product ion mass spectrum of the cyanopeptolin CP 939.

Chemical Formula:  $C_{48}H_{63}N_7O_{13}S$   
Exact Mass: 953.42046

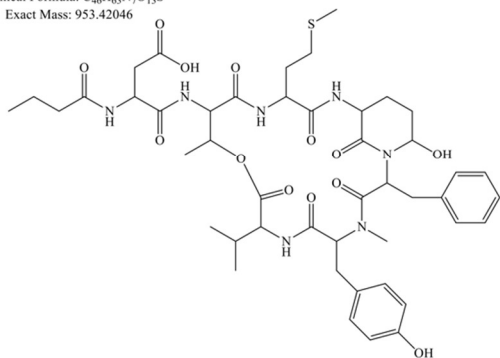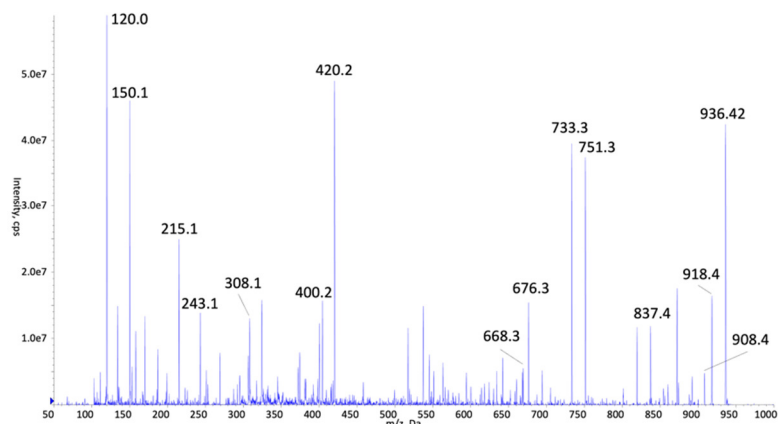

Figure S45. Structure and enhanced product ion mass spectrum of the cyanopeptolin CP 953b.

Chemical Formula:  $C_{49}H_{69}N_7O_{13}S$   
Exact Mass: 995.46741

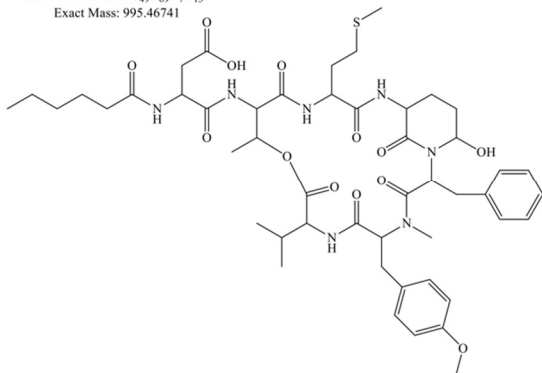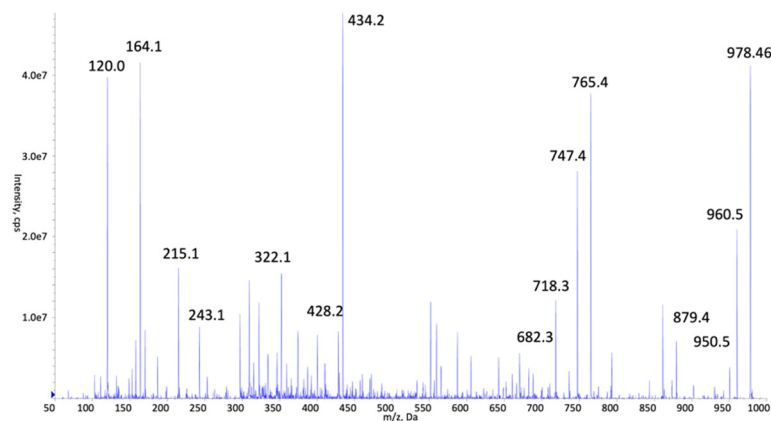

Figure S46. Structure and enhanced product ion mass spectrum of the cyanopeptolin CP 995.

Chemical Formula:  $C_{51}H_{73}N_7O_{13}S$   
Exact Mass: 1023.49871

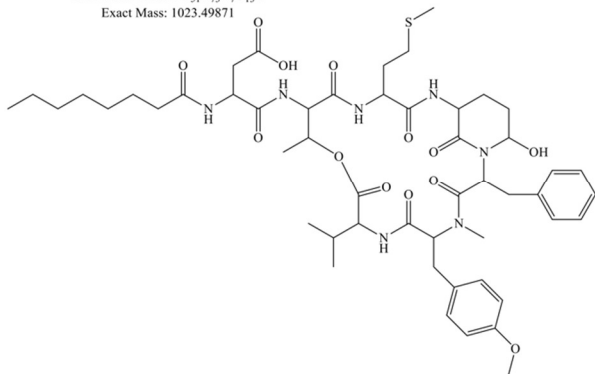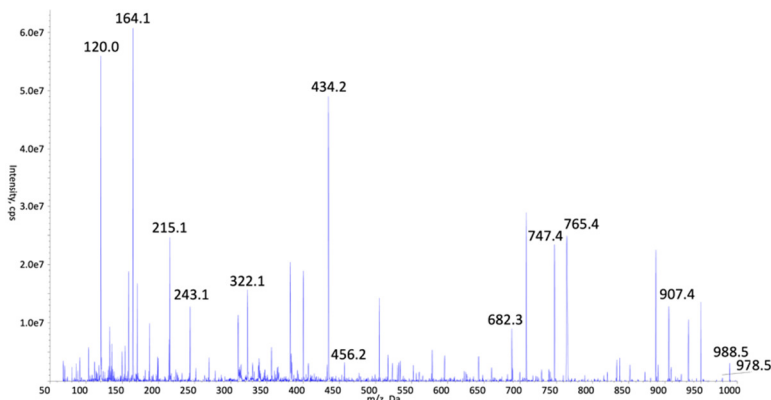

Figure S47. Structure and enhanced product ion mass spectrum of the cyanopeptolin CP 1023.

Chemical Formula:  $C_{51}H_{65}N_7O_{14}$   
Exact Mass: 999.45895

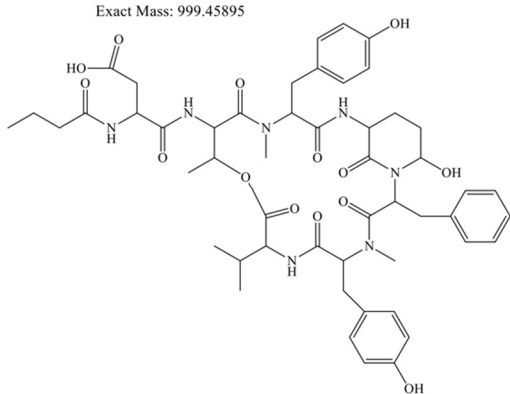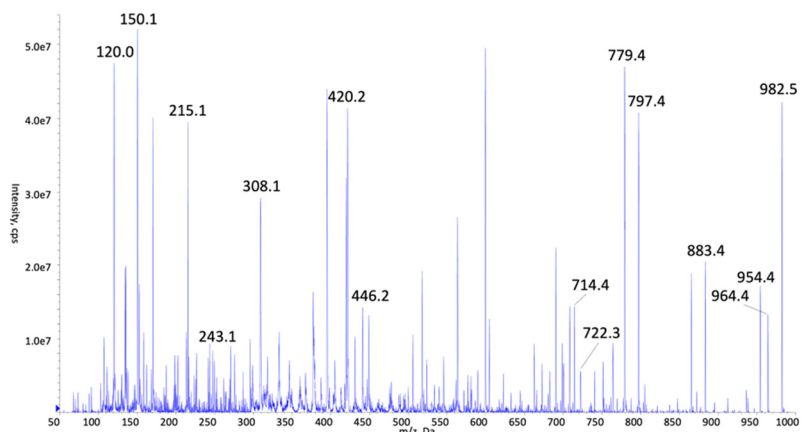

Figure S48. Structure and enhanced product ion mass spectrum of the cyanopeptolin CP 999d.



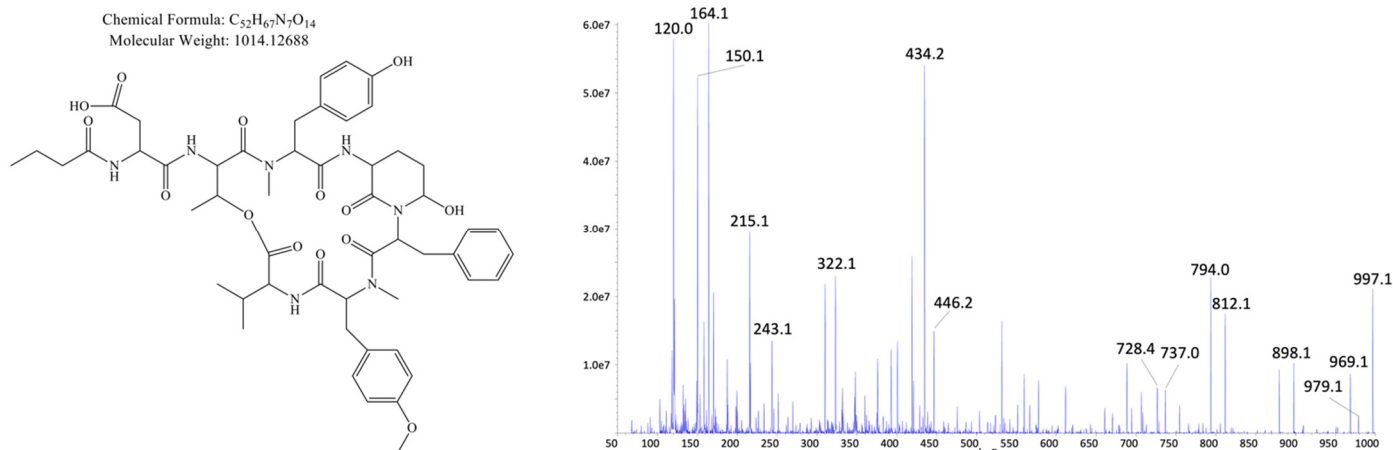

Figure S49. Structure and enhanced product ion mass spectrum of the cyanopeptolin CP 1014.

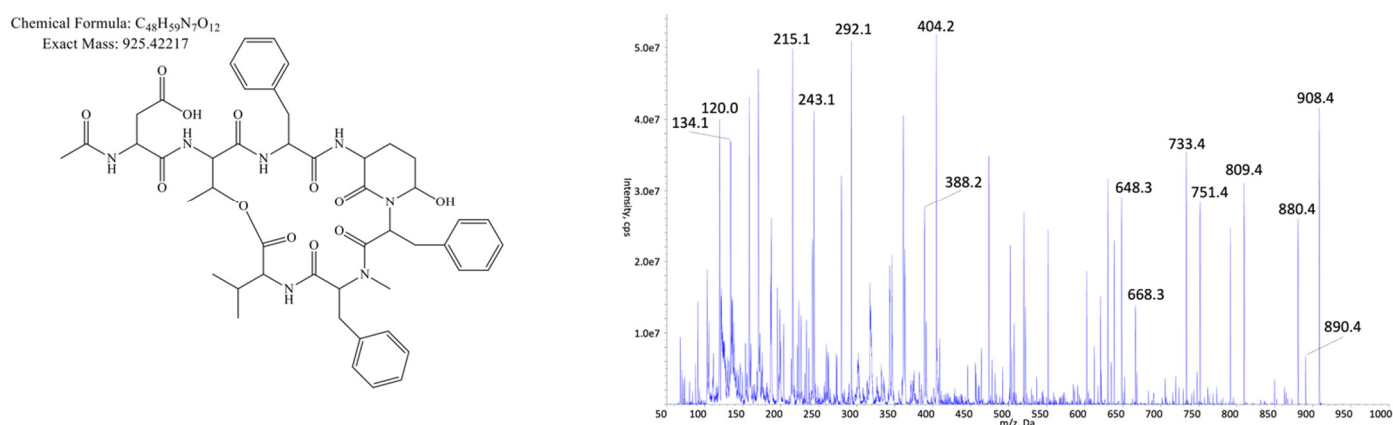

Figure S50. Structure and enhanced product ion mass spectrum of the cyanopeptolin CP 925.

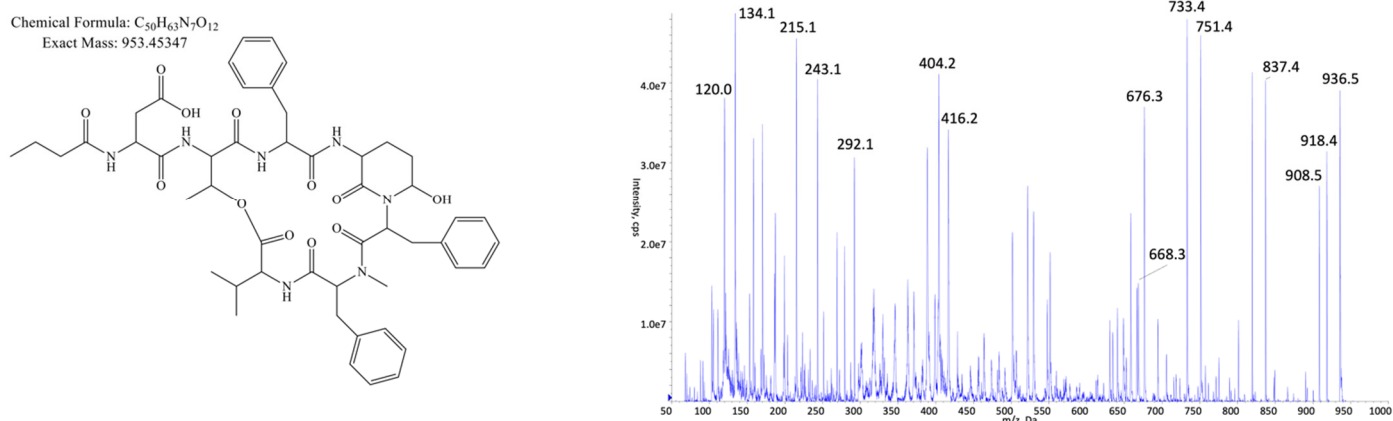

Figure S51. Structure and enhanced product ion mass spectrum of the cyanopeptolin CP 953.

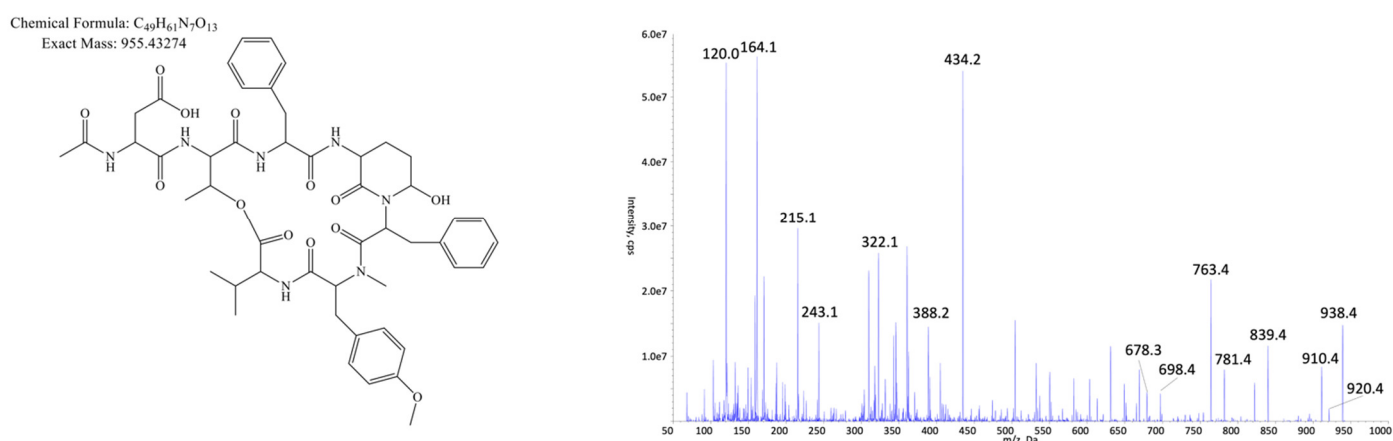

Figure S52. Structure and enhanced product ion mass spectrum of the cyanopeptolin CP 955.

Chemical Formula:  $C_{51}H_{65}N_7O_{12}$   
Exact Mass: 967.46912

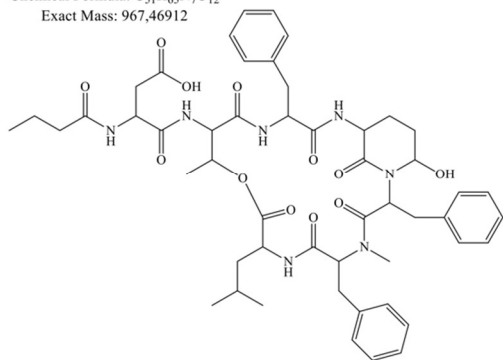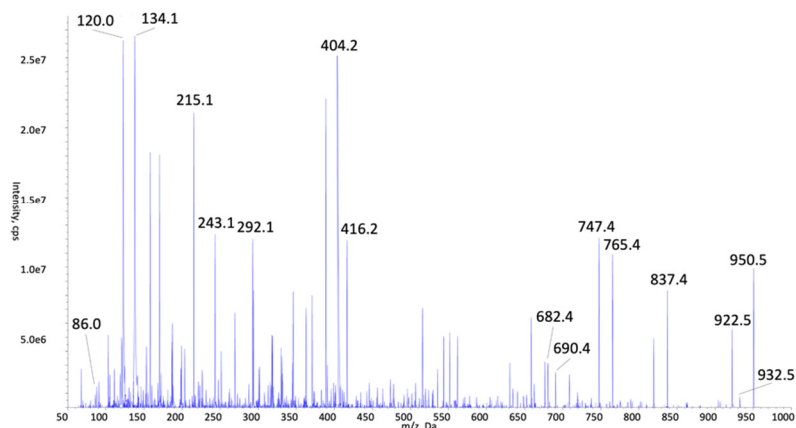

Figure S53. Structure and enhanced product ion mass spectrum of the cyanopeptolin CP 967.

Chemical Formula:  $C_{50}H_{63}N_7O_{13}$   
Exact Mass: 969.44839

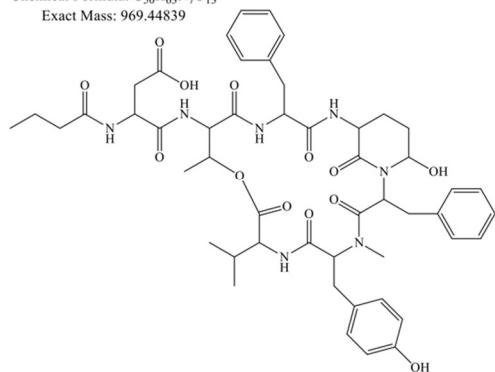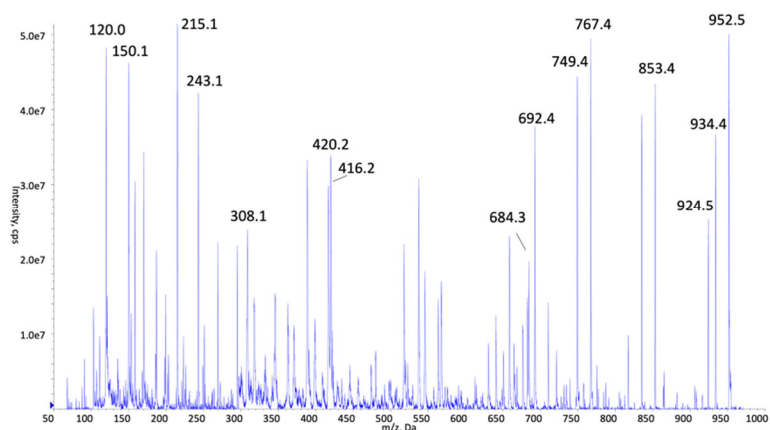

Figure S54. Structure and enhanced product ion mass spectrum of the cyanopeptolin CP 969b.

Chemical Formula:  $C_{52}H_{67}N_7O_{12}$   
Exact Mass: 981.48477

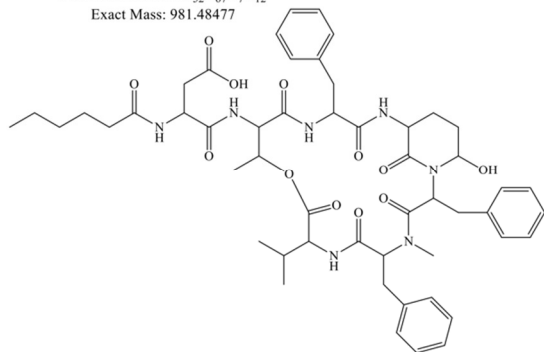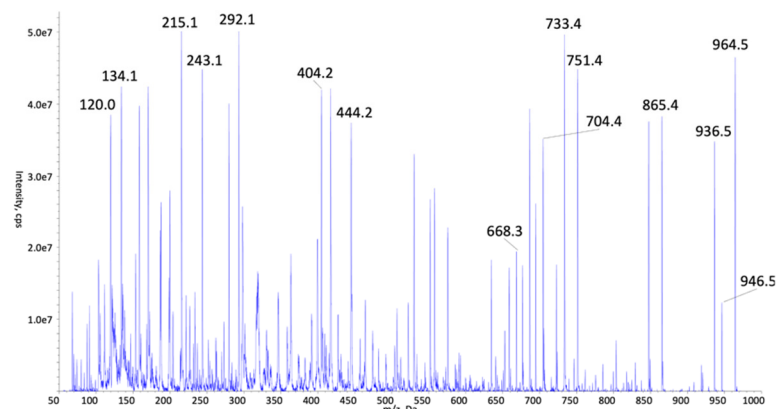

Figure S55. Structure and enhanced product ion mass spectrum of the cyanopeptolin CP 981.

Chemical Formula:  $C_{52}H_{67}N_7O_{13}$   
Exact Mass: 997.47969

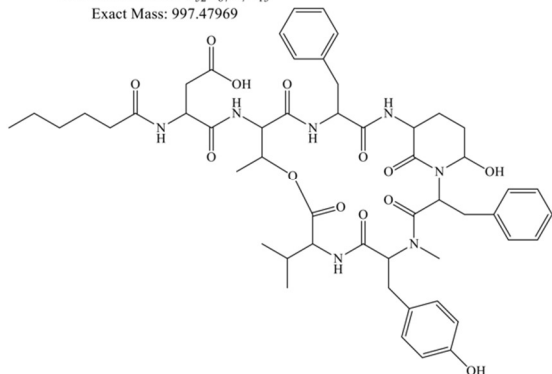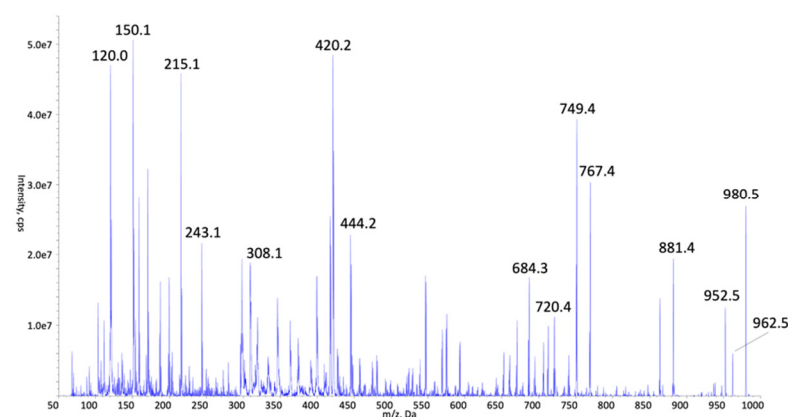

Figure S56. Structure and enhanced product ion mass spectrum of the cyanopeptolin CP 997.



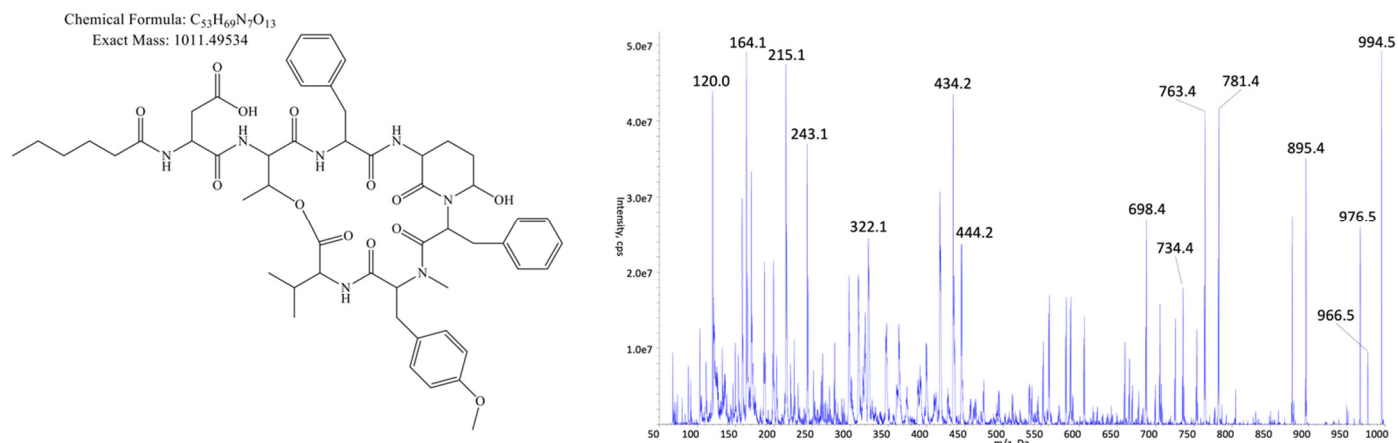

Figure S57. Structure and enhanced product ion mass spectrum of the cyanopeptolin CP 1011.

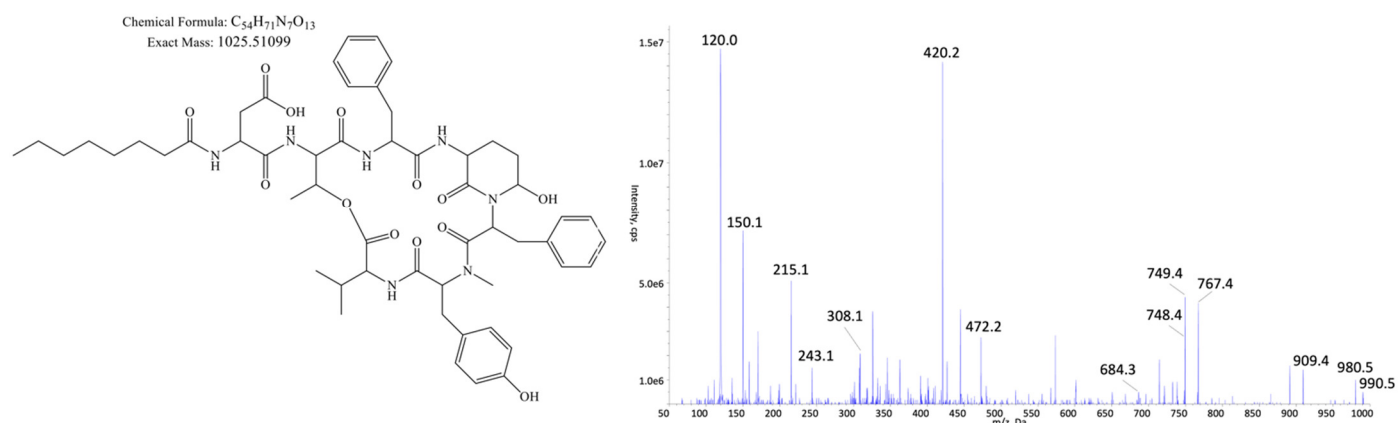

Figure S58. Structure and enhanced product ion mass spectrum of the cyanopeptolin CP 1025b.

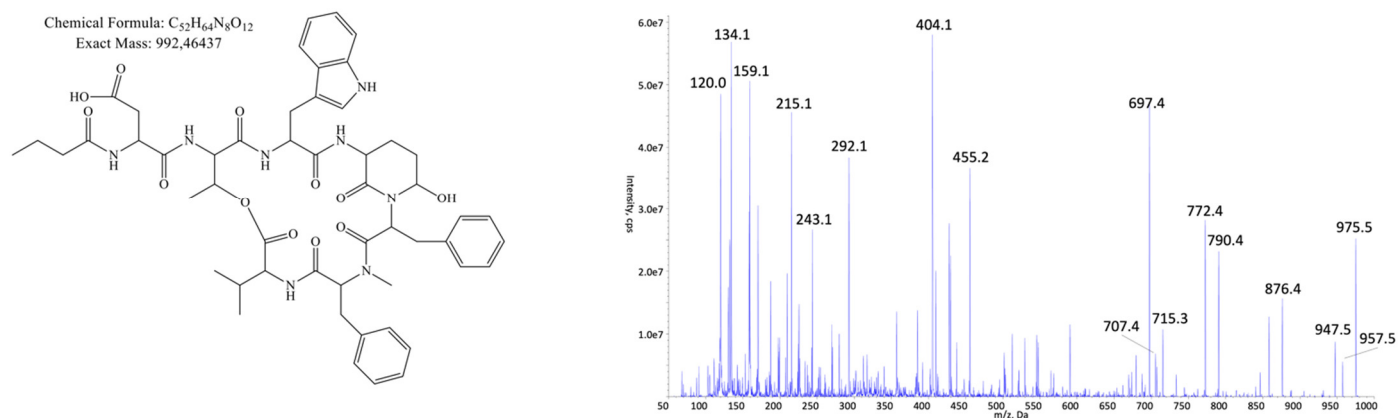

Figure S59. Structure and enhanced product ion mass spectrum of the cyanopeptolin CP 992d.

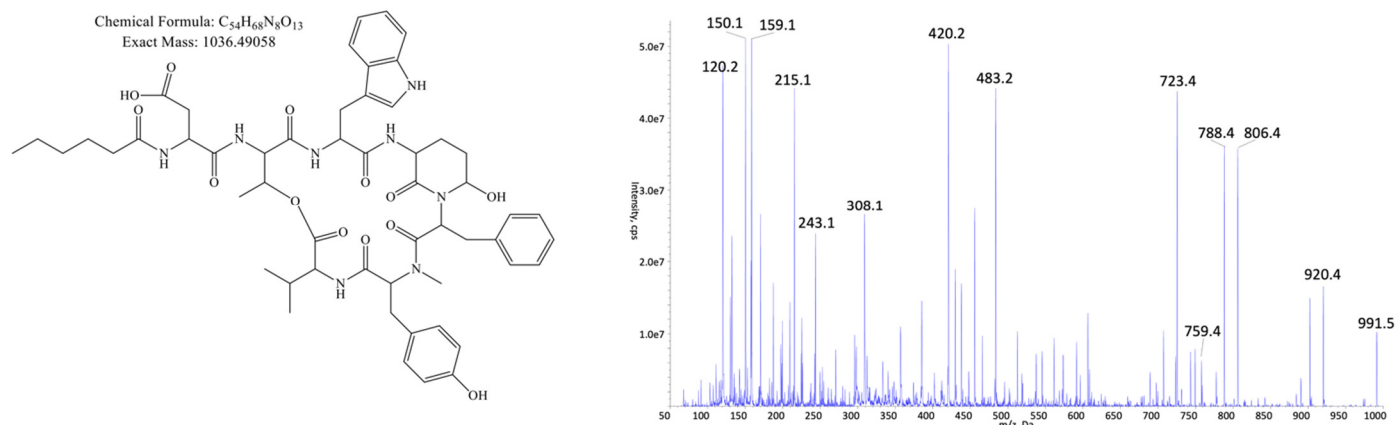

Figure S60. Structure and enhanced product ion mass spectrum of the cyanopeptolin CP 1036c.

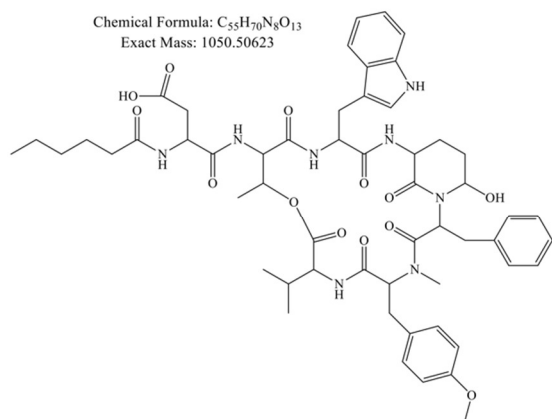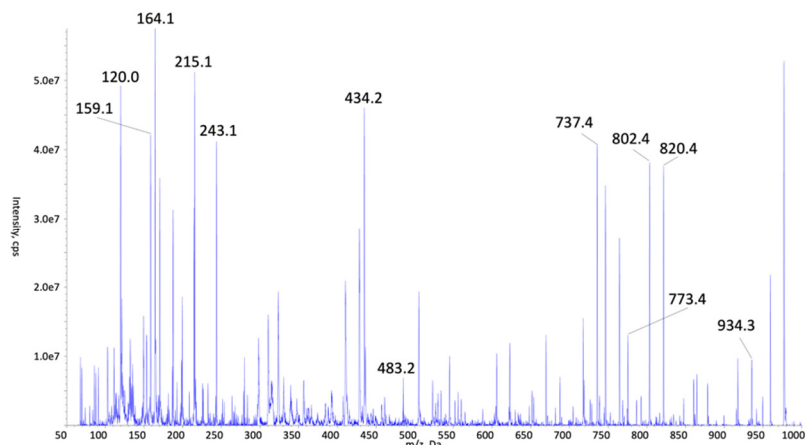

Figure S61. Structure and enhanced product ion mass spectrum of the cyanopeptolin CP 1050.

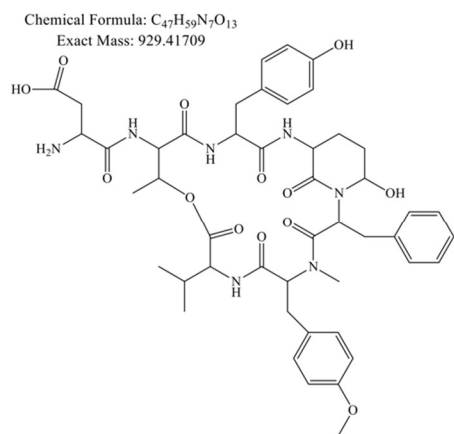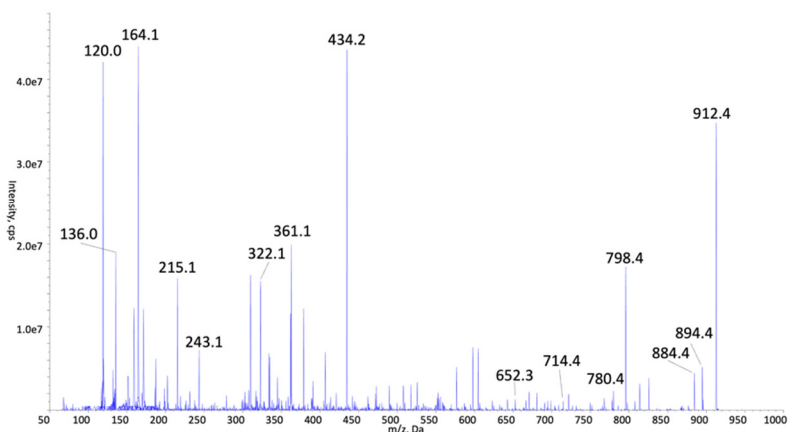

Figure S62. Structure and enhanced product ion mass spectrum of the cyanopeptolin CP 929.

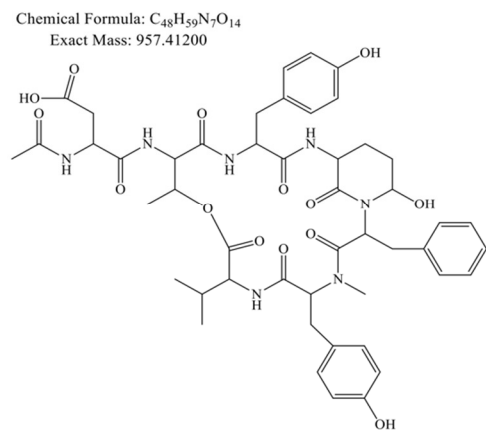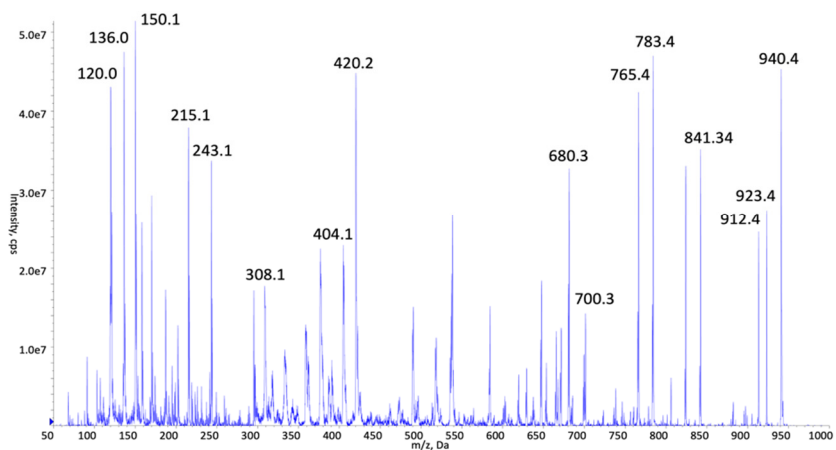

Figure S63. Structure and enhanced product ion mass spectrum of the cyanopeptolin CP 957.

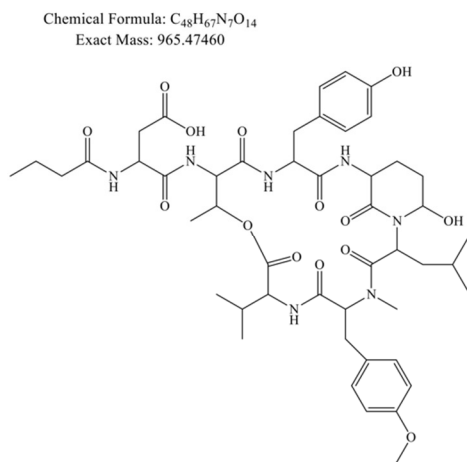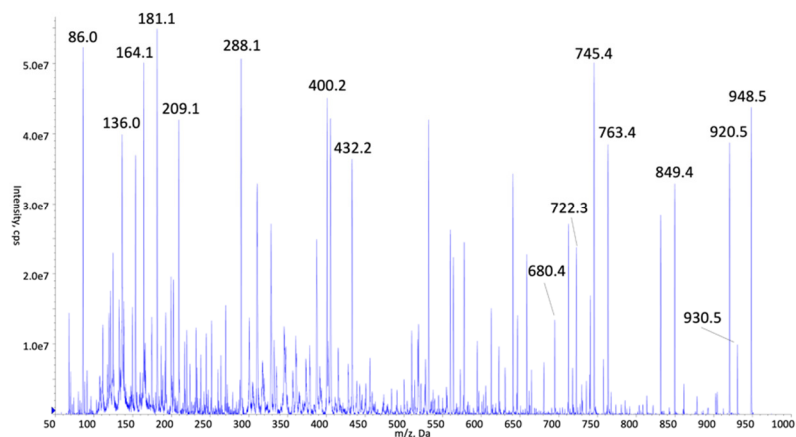

Figure S64. Structure and enhanced product ion mass spectrum of the cyanopeptolin CP 965.

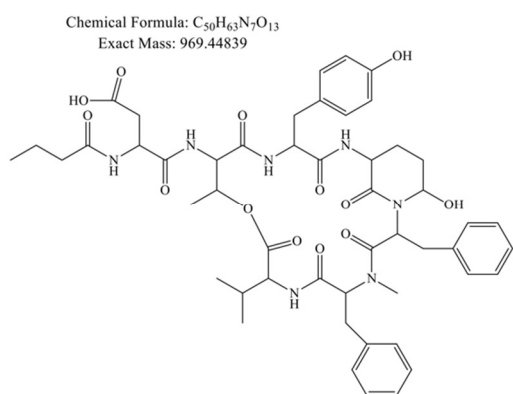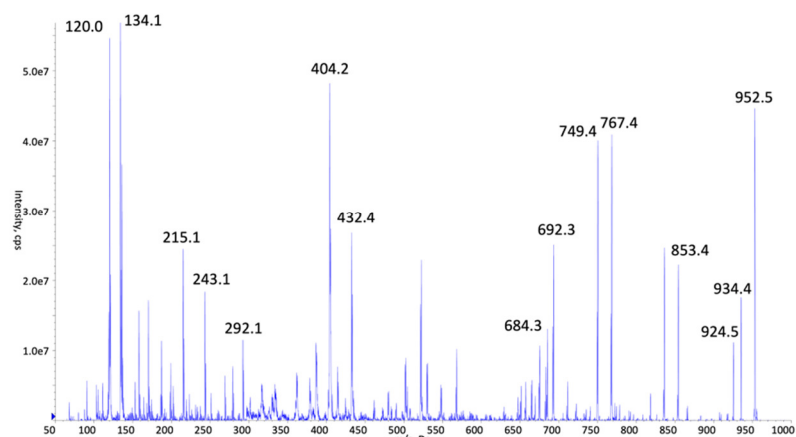

Figure S65. Structure and enhanced product ion mass spectrum of the cyanopeptolin CP 969 [8].

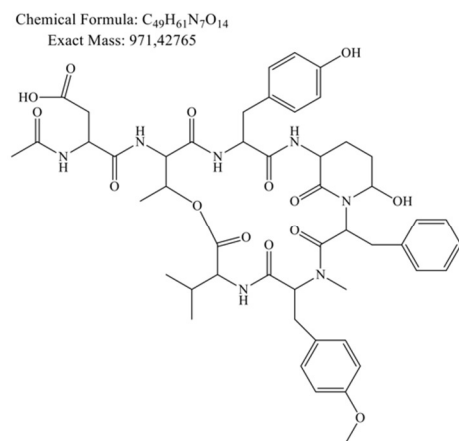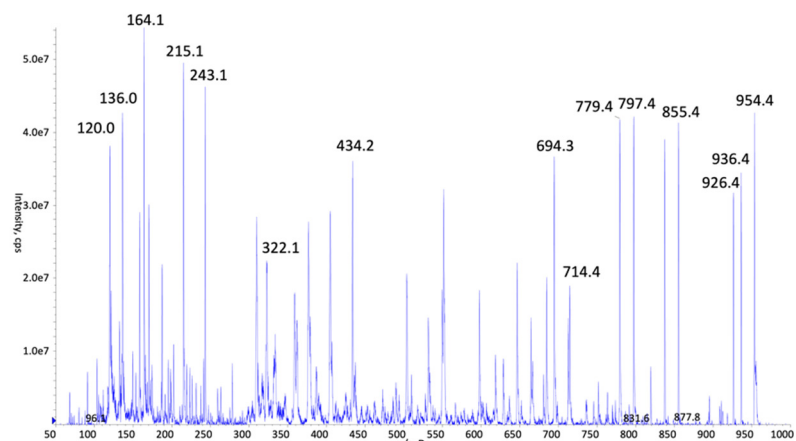

Figure S66. Structure and enhanced product ion mass spectrum of the cyanopeptolin CP 971.

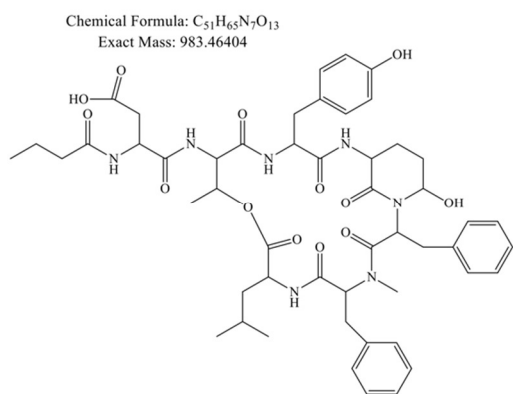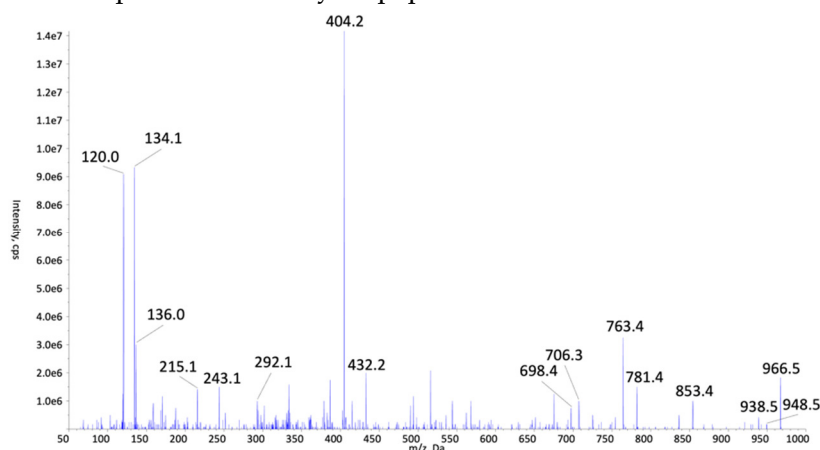

Figure S67. Structure and enhanced product ion mass spectrum of the cyanopeptolin CP 983b.

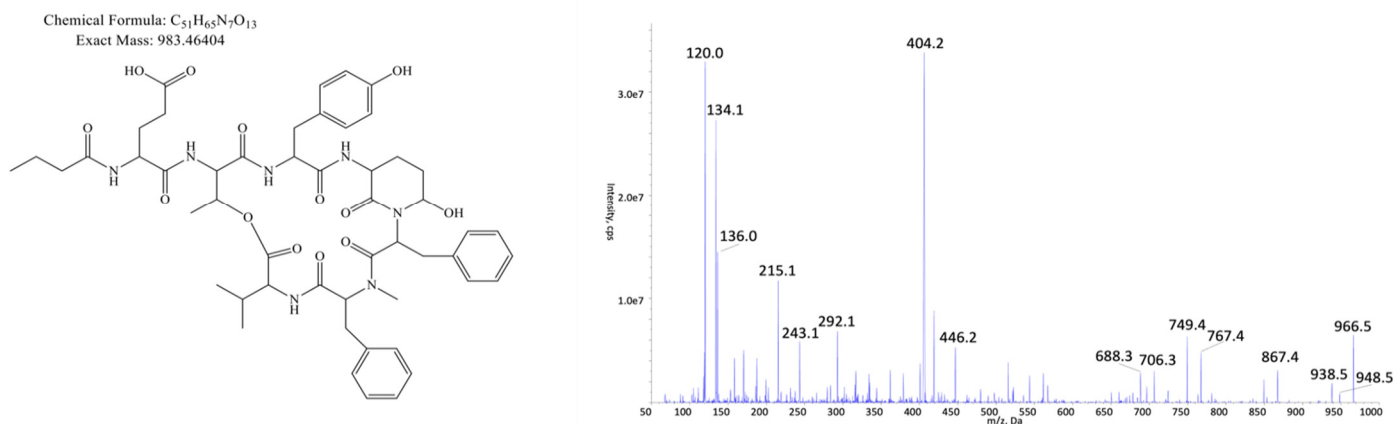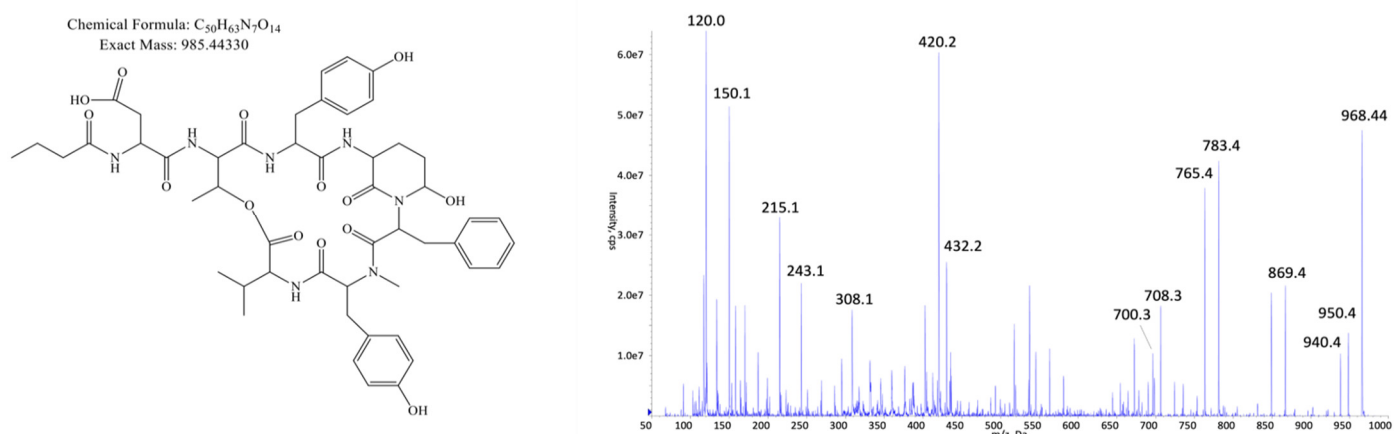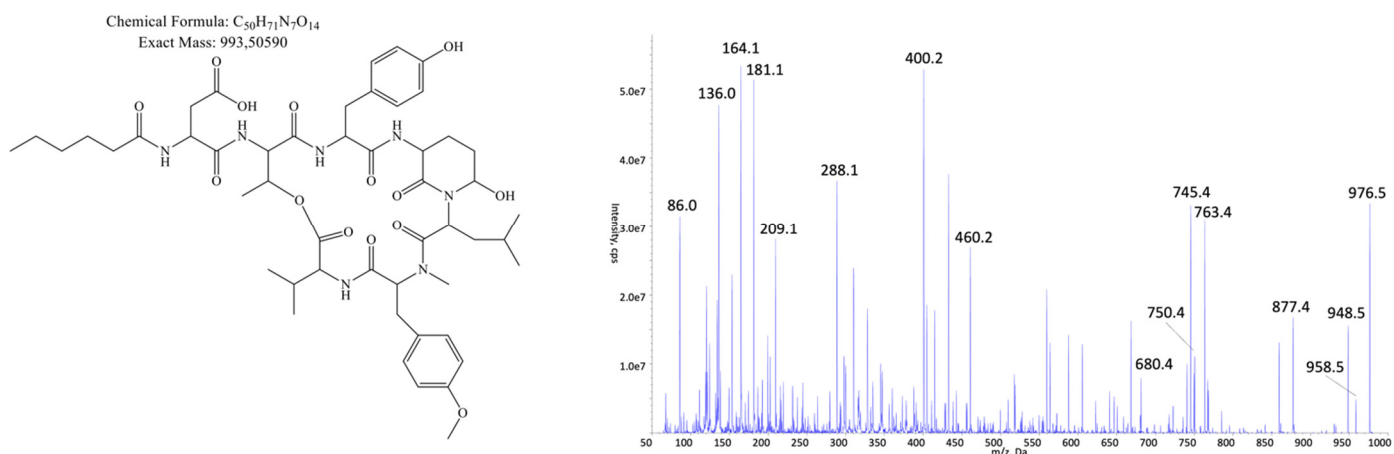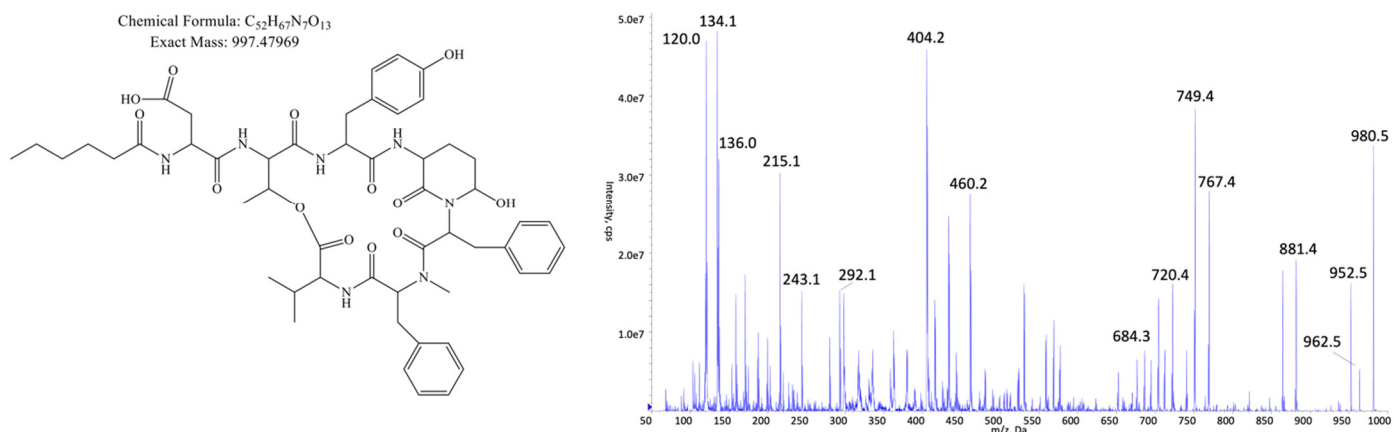

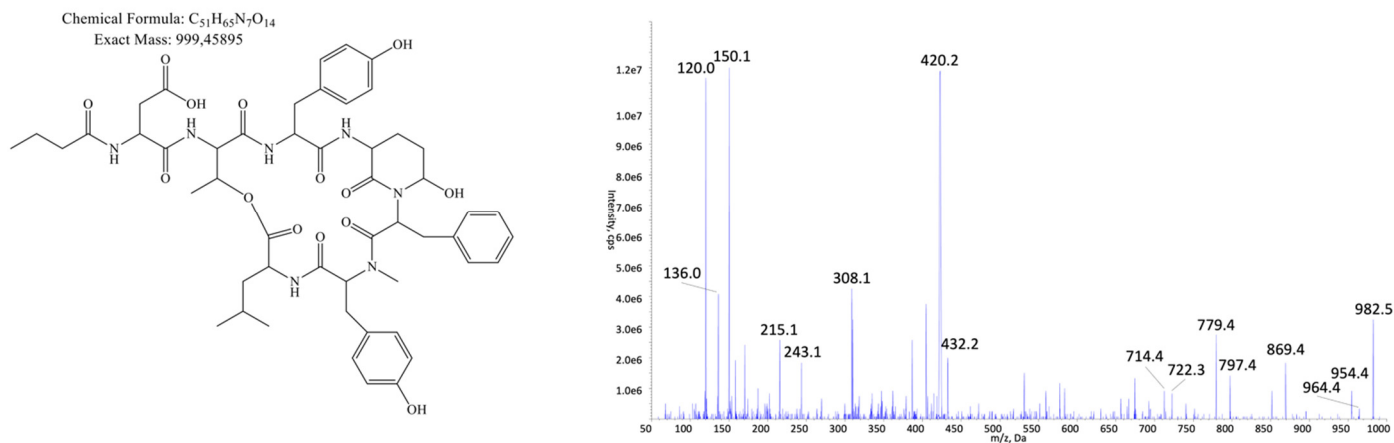

Figure S72. Structure and enhanced product ion mass spectrum of the cyanopeptolin CP 999b.

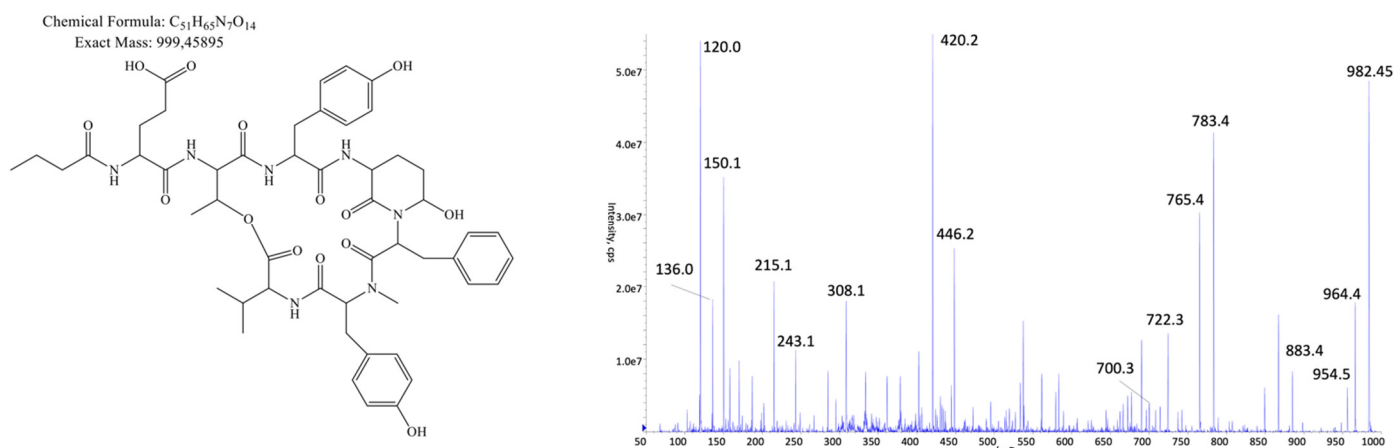

Figure S73. Structure and enhanced product ion mass spectrum of the cyanopeptolin CP 999c.

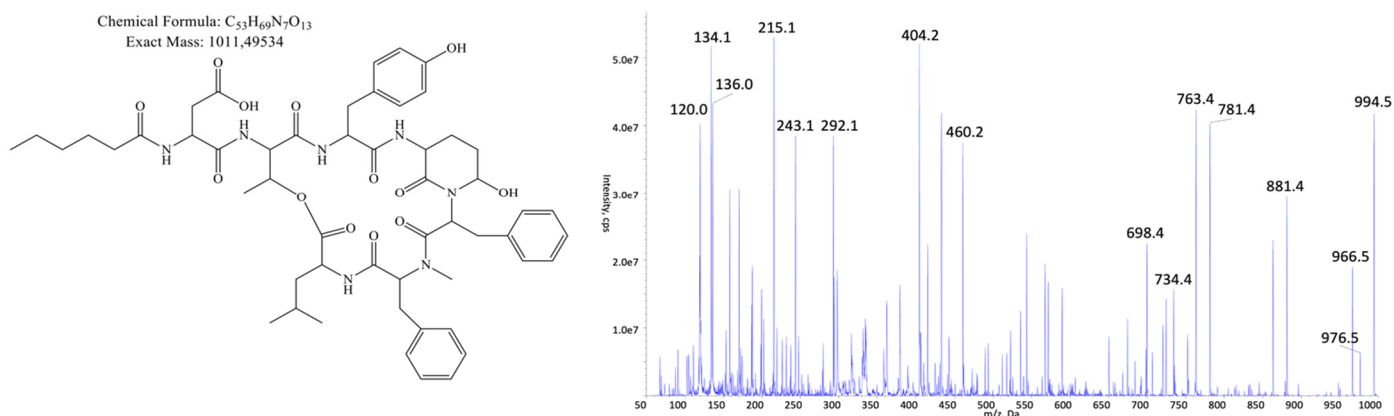

Figure S74. Structure and enhanced product ion mass spectrum of the cyanopeptolin CP 1011b.

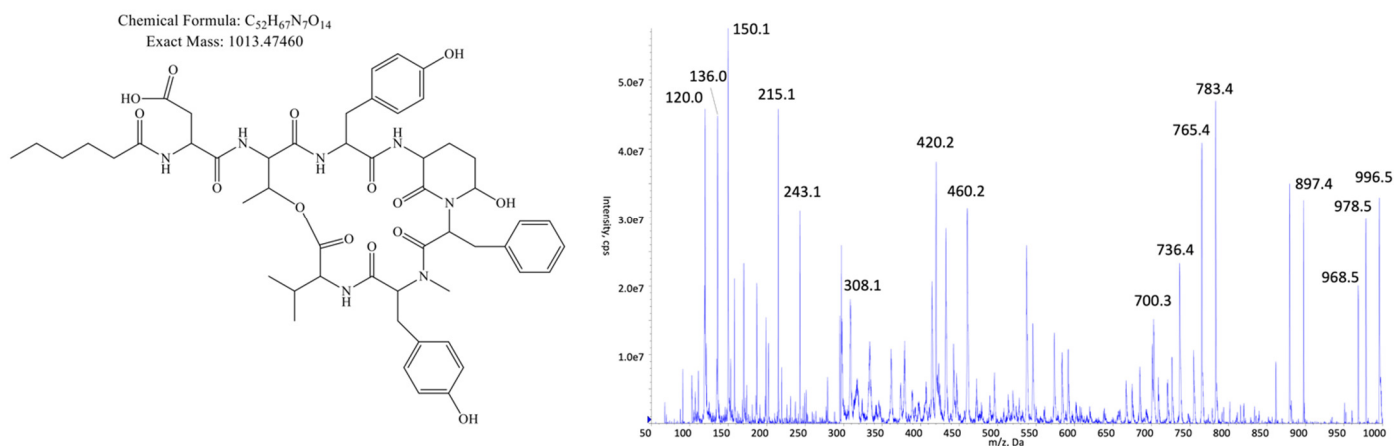

Figure S75. Structure and enhanced product ion mass spectrum of the cyanopeptolin CP 1013 [8].

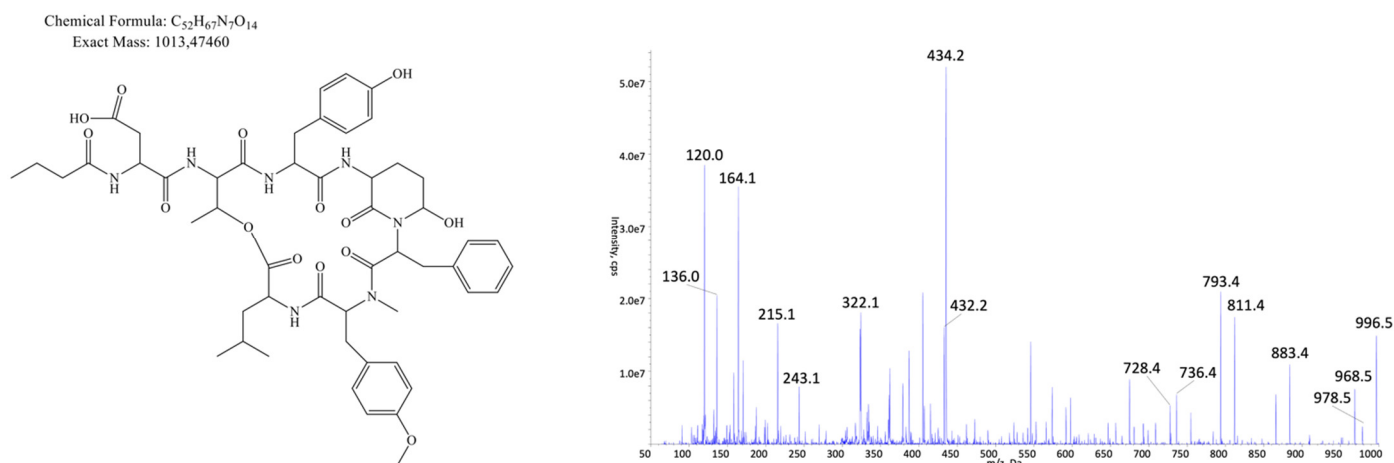

Figure S76. Structure and enhanced product ion mass spectrum of the cyanopeptolin CP 1013b.

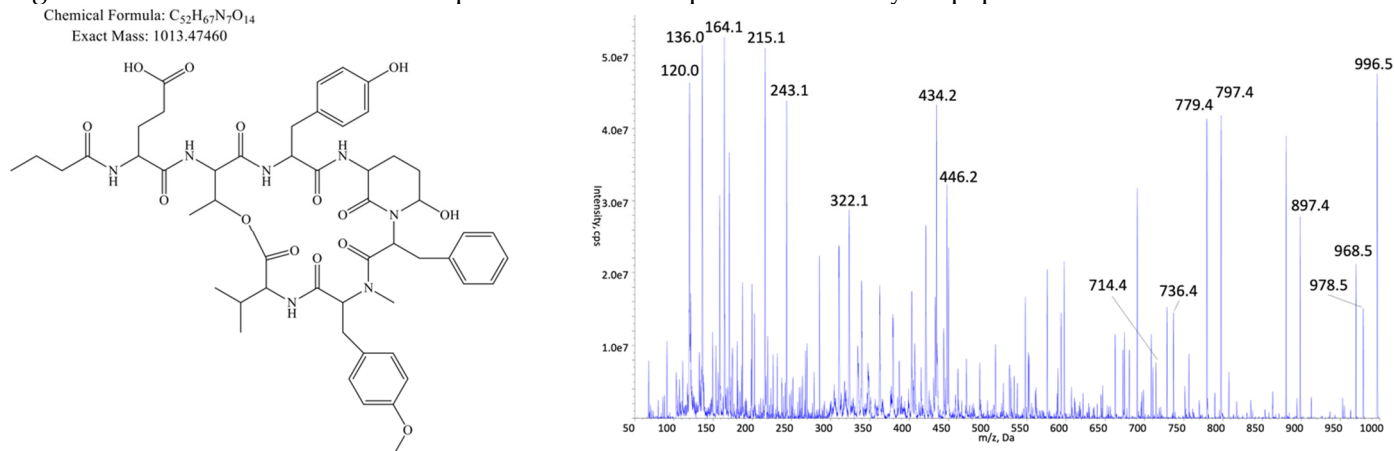

Figure S77. Structure and enhanced product ion mass spectrum of the cyanopeptolin CP 1013c.

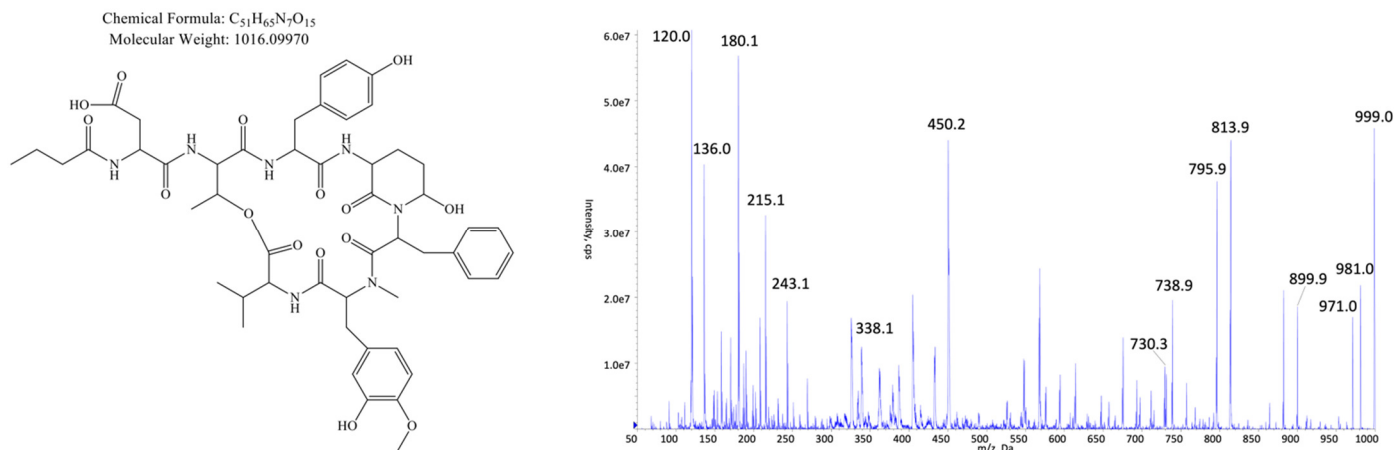

Figure S78. Structure and enhanced product ion mass spectrum of the cyanopeptolin CP 1016.



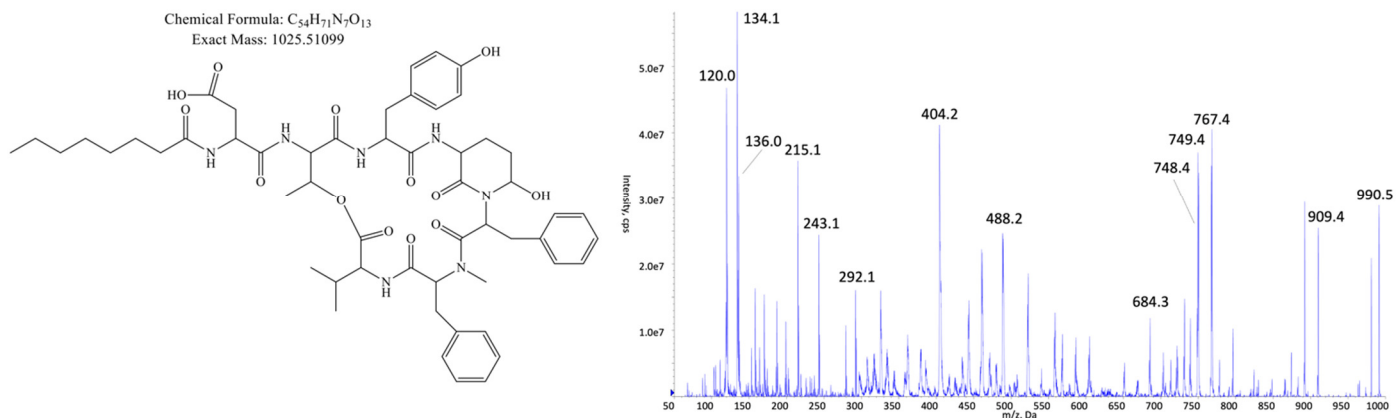

Figure S79. Structure and enhanced product ion mass spectrum of the cyanopeptolin CP 1025.

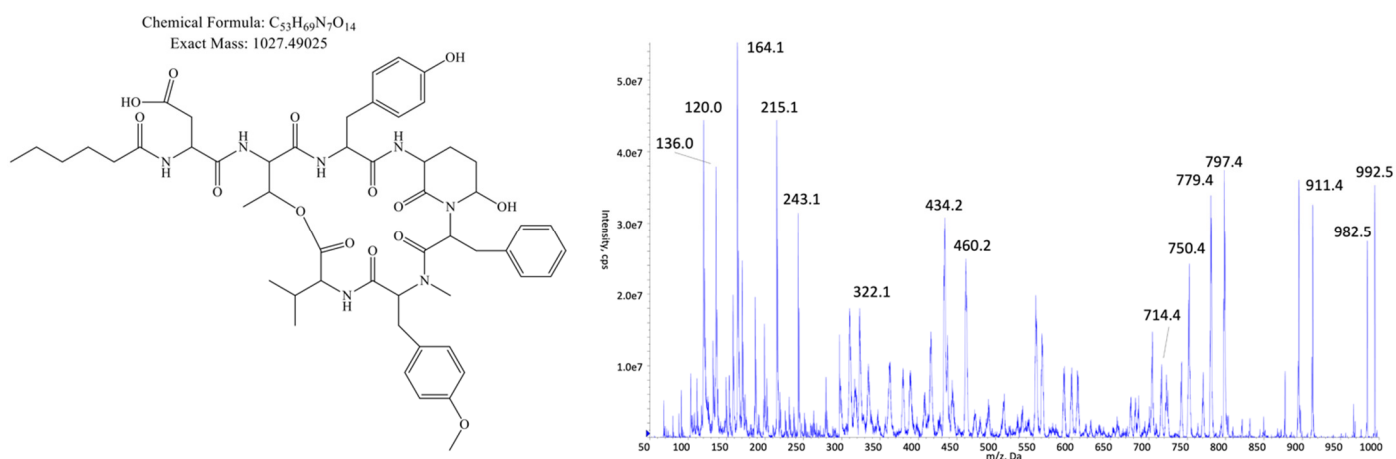

Figure S80. Structure and enhanced product ion mass spectrum of the cyanopeptolin CP 1027 [8].

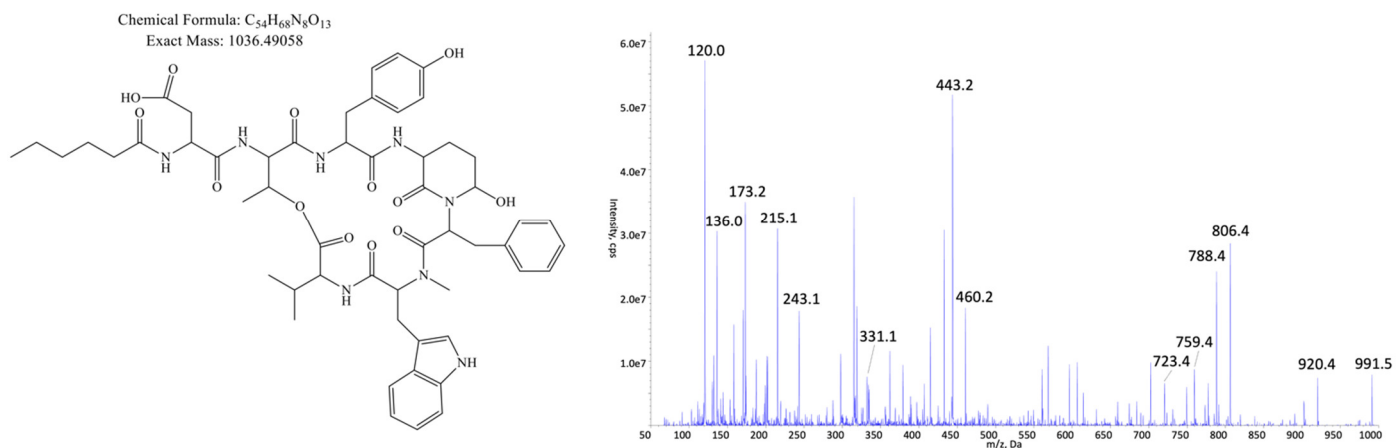

Figure S81. Structure and enhanced product ion mass spectrum of the cyanopeptolin CP 1036b.

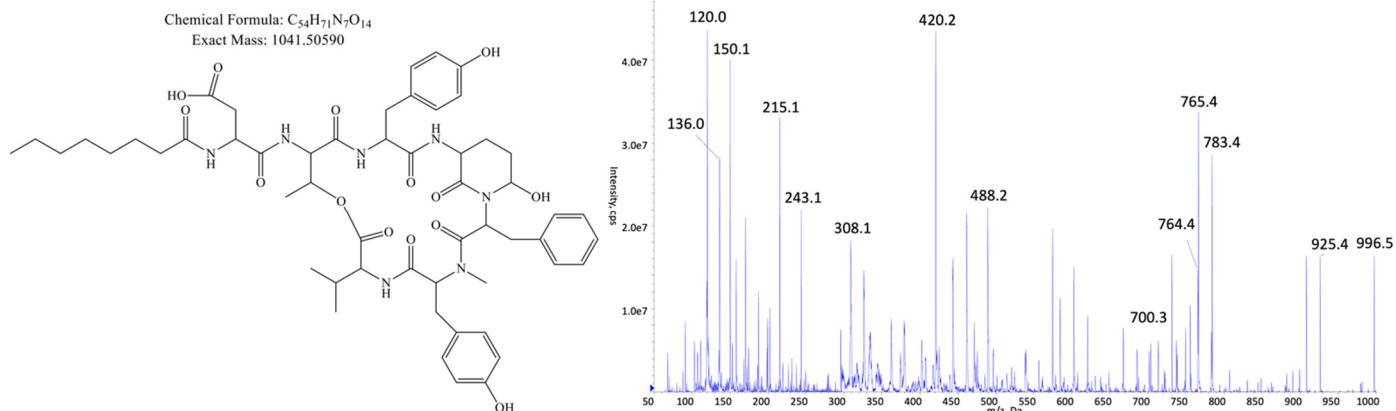

Figure S82. Structure and enhanced product ion mass spectrum of the cyanopeptolin CP 1041.

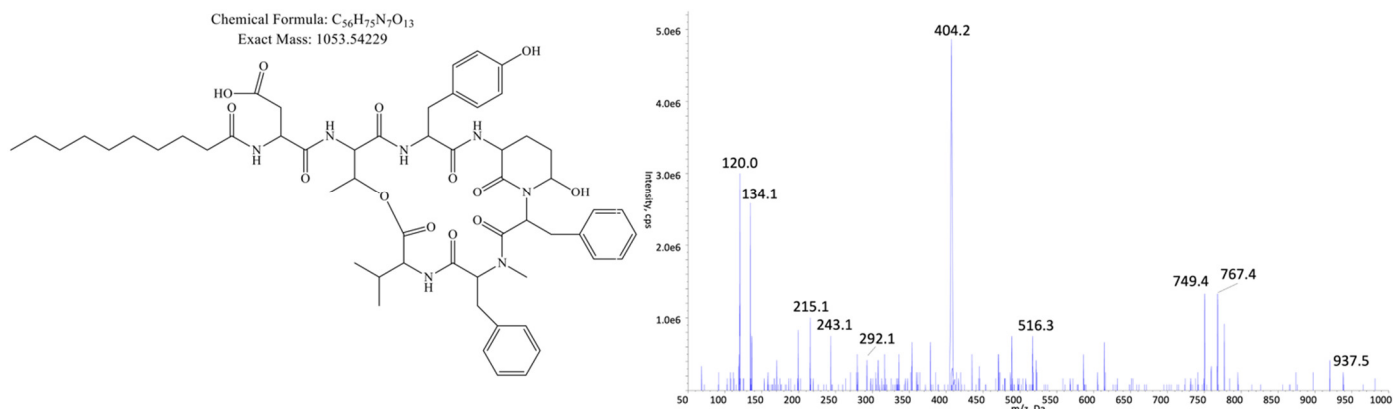

Figure S83. Structure and enhanced product ion mass spectrum of the cyanopeptolin CP 1053.

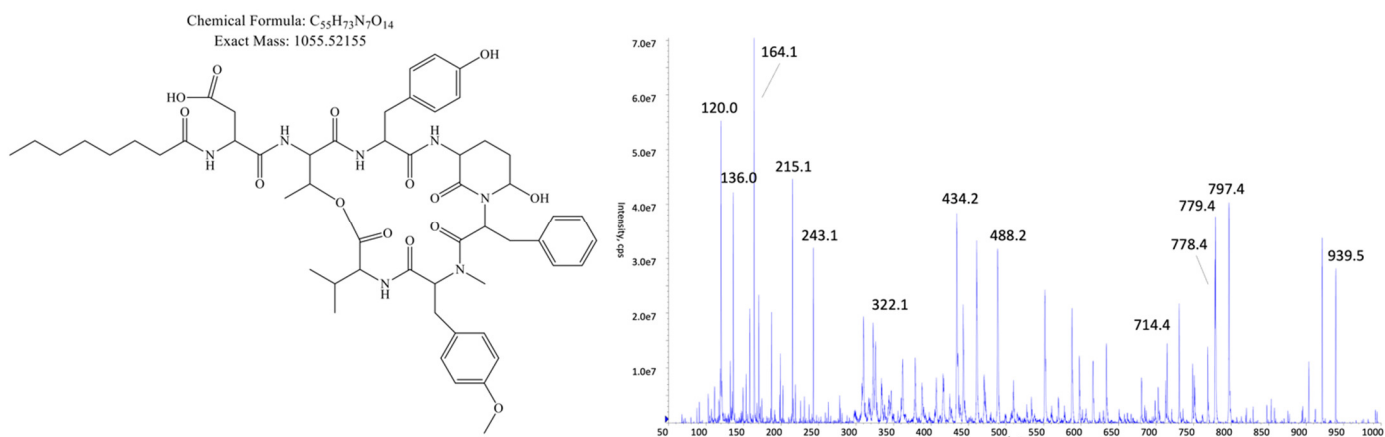

Figure S84. Structure and enhanced product ion mass spectrum of the cyanopeptolin CP 1055.

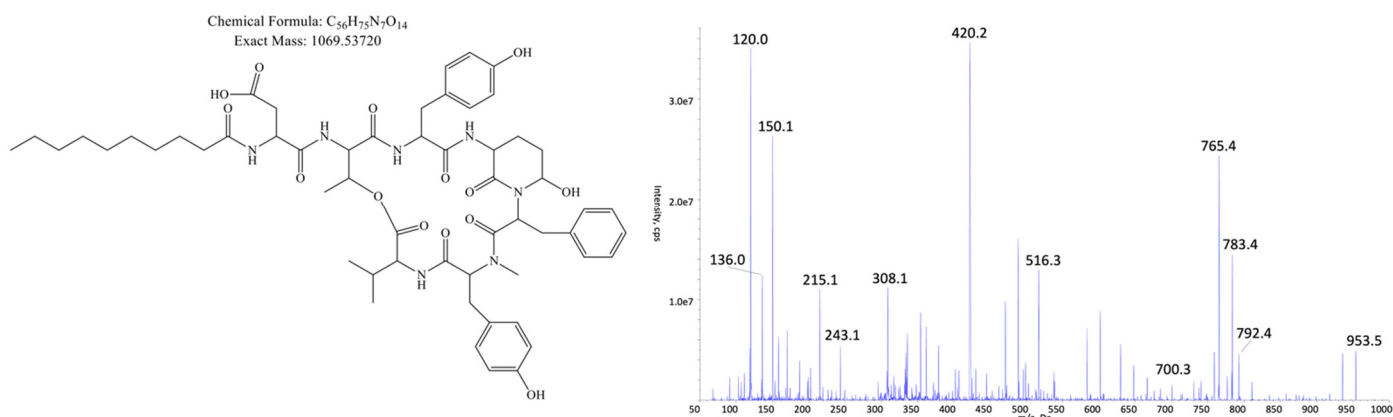

Figure S85. Structure and enhanced product ion mass spectrum of the cyanopeptolin CP 1069.

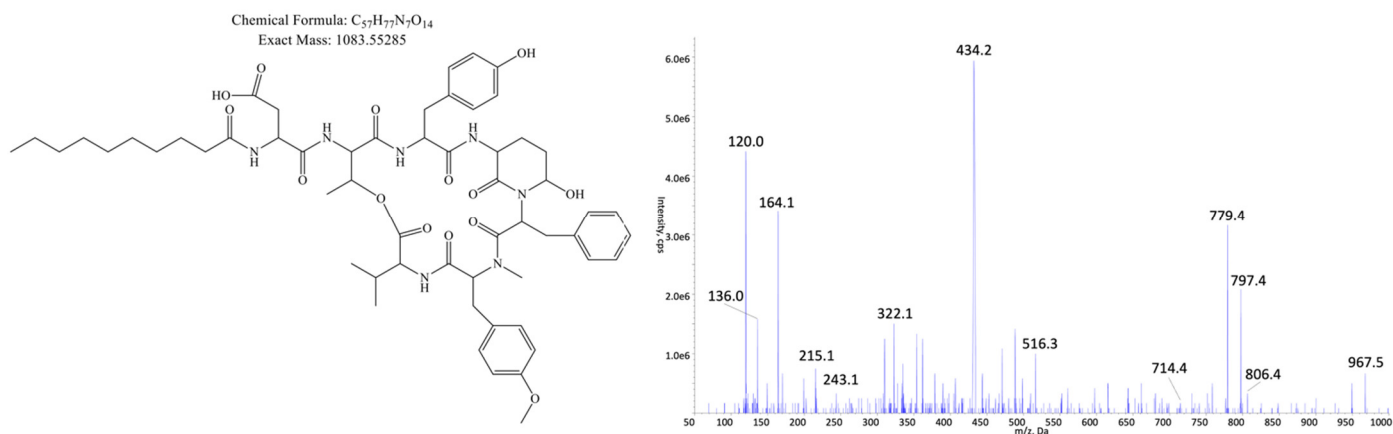

Figure S86. Structure and enhanced product ion mass spectrum of the cyanopeptolin CP 1083.



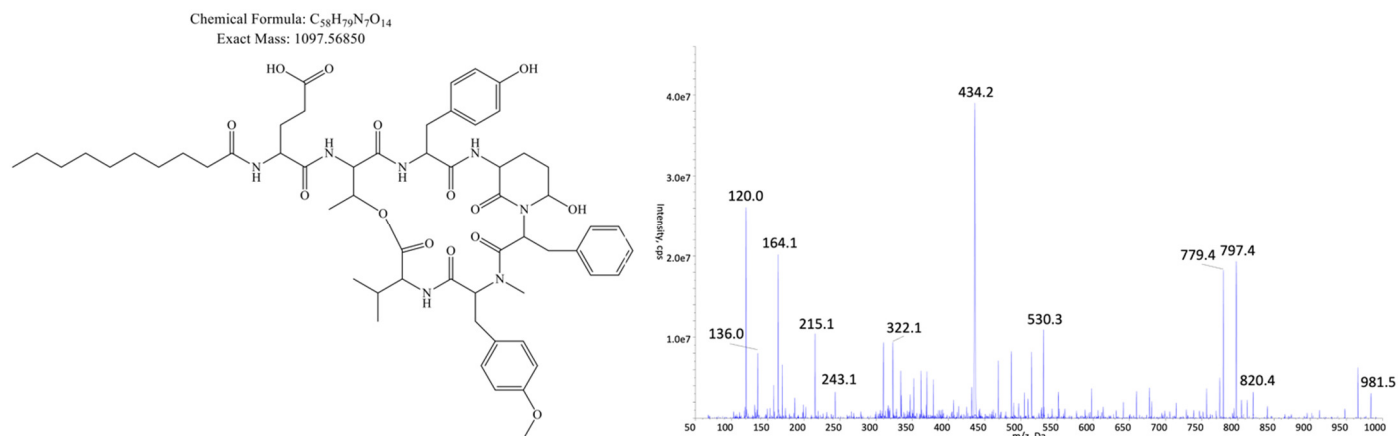

Figure S87. Structure and enhanced product ion mass spectrum of the cyanopeptolin CP 1097.

Table S3. Diagnostic ions for cyanopeptolins produced by *Nostoc edaphicum* CCNP1411.

| Group  | Name     | ( <i>m/z</i> ) [M+H] <sup>+</sup> | [M+H-H <sub>2</sub> O] <sup>+</sup> | [M+H-H <sub>2</sub> O-CO] <sup>+</sup> | [M+H-X <sup>6</sup> -H <sub>2</sub> O] <sup>+</sup> | [M+H-SC] <sup>+</sup> | [M+2H-SC-H <sub>2</sub> O] <sup>+</sup> | [M+2H-SC-2H <sub>2</sub> O] <sup>+</sup> | [M+H-(Ahp+X <sup>4</sup> )-H <sub>2</sub> O] <sup>+</sup> | [X <sub>2</sub> +Ahp+X <sup>4</sup> +X <sup>5</sup> +X <sup>6</sup> +H] <sup>+</sup> | [SC+Thr+X <sup>2</sup> +H-H <sub>2</sub> O] <sup>+</sup> | [Ahp+X <sup>4</sup> +X <sup>5</sup> +H-H <sub>2</sub> O] <sup>+</sup> | [Ahp+X <sup>4</sup> +H-H <sub>2</sub> O] <sup>+</sup> | [X <sup>4</sup> +X <sup>5</sup> +2H-H <sub>2</sub> O] <sup>+</sup> | [Ahp+X <sup>4</sup> +H-CO-H <sub>2</sub> O] <sup>+</sup> |
|--------|----------|-----------------------------------|-------------------------------------|----------------------------------------|-----------------------------------------------------|-----------------------|-----------------------------------------|------------------------------------------|-----------------------------------------------------------|--------------------------------------------------------------------------------------|----------------------------------------------------------|-----------------------------------------------------------------------|-------------------------------------------------------|--------------------------------------------------------------------|----------------------------------------------------------|
| CP-Arg | CP 777   | 778.43                            | 760.4                               | 732.4                                  | 661.3                                               |                       |                                         |                                          | 500.3                                                     | 677.4                                                                                |                                                          | 404.2                                                                 | 243.1                                                 | 292.1                                                              | 215.1                                                    |
| CP-Arg | CP 807   | 808.44                            | 790.4                               | 762.4                                  | 691.4                                               |                       |                                         |                                          | 530.3                                                     | 707.4                                                                                |                                                          | 434.2                                                                 | 243.1                                                 | 322.1                                                              | 215.1                                                    |
| CP-Arg | CP 892   | 893.45                            | 875.4                               | 847.4                                  | 776.4                                               | 778.4                 | 761.4                                   | 743.4                                    | 615.3                                                     | 677.4                                                                                | 354.2                                                    | 404.2                                                                 | 243.1                                                 | 292.1                                                              | 215.1                                                    |
| CP-Arg | CP 922   | 923.46                            | 905.5                               | 877.5                                  | 806.4                                               | 808.4                 | 791.4                                   | 773.4                                    | 645.3                                                     | 707.4                                                                                | 354.2                                                    | 434.2                                                                 | 243.1                                                 | 322.1                                                              | 215.1                                                    |
| CP-Arg | CP 934   | 935.46                            | 917.5                               | 889.5                                  | 818.4                                               | 777.4                 | 760.4                                   | 742.4                                    | 657.3                                                     | 677.4                                                                                | 397.2                                                    | 404.2                                                                 | 243.1                                                 | 292.1                                                              | 215.1                                                    |
| CP-Arg | CP 944   | 945.51                            | 927.5                               | 899.5                                  | 828.4                                               | 759.4                 | 742.4                                   | 724.4                                    | 700.4                                                     | 660.4                                                                                | 425.2                                                    | 387.2                                                                 | 210.1                                                 | 274.1                                                              | 182.1                                                    |
| CP-Arg | CP 950   | 951.46                            | 933.4                               | 905.5                                  | 834.4                                               | 793.4                 | 776.4                                   | 758.4                                    | 673.3                                                     | 693.4                                                                                | 397.2                                                    | 420.2                                                                 | 243.1                                                 | 308.1                                                              | 215.1                                                    |
| CP-Arg | CP 962   | 963.49                            | 945.5                               | 917.5                                  | 846.4                                               | 777.4                 | 760.4                                   | 742.4                                    | 685.4                                                     | 677.4                                                                                | 425.2                                                    | 404.2                                                                 | 243.1                                                 | 292.1                                                              | 215.1                                                    |
| CP-Arg | CP 964   | 965.47                            | 947.5                               | 919.5                                  | 848.4                                               | 807.4                 | 790.4                                   | 772.4                                    | 687.3                                                     | 707.4                                                                                | 397.2                                                    | 434.2                                                                 | 243.1                                                 | 322.1                                                              | 215.1                                                    |
| CP-Arg | CP 976   | 977.51                            | 959.5                               | 931.5                                  | 846.4                                               | 791.4                 | 774.4                                   | 756.4                                    | 699.4                                                     | 691.4                                                                                | 425.2                                                    | 404.2                                                                 | 243.1                                                 | 292.1                                                              | 215.1                                                    |
| CP-Arg | CP 978   | 979.49                            | 961.5                               | 933.5                                  | 862.4                                               | 793.4                 | 776.4                                   | 758.4                                    | 701.4                                                     | 693.4                                                                                | 425.2                                                    | 420.2                                                                 | 243.1                                                 | 308.1                                                              | 215.1                                                    |
| CP-Arg | CP 990   | 991.52                            | 973.5                               | 945.5                                  | 874.4                                               | 777.4                 | 760.4                                   | 742.4                                    | 713.4                                                     | 677.4                                                                                | 453.2                                                    | 404.2                                                                 | 243.1                                                 | 292.1                                                              | 215.1                                                    |
| CP-Arg | CP 992   | 993.50                            | 975.5                               | 947.5                                  | 876.4                                               | 807.4                 | 790.4                                   | 772.4                                    | 715.4                                                     | 707.4                                                                                | 425.2                                                    | 434.2                                                                 | 243.1                                                 | 322.1                                                              | 215.1                                                    |
| CP-Arg | CP 992b  | 993.50                            | 975.5                               | 947.5                                  | 862.4                                               | 807.4                 | 790.4                                   | 772.4                                    | 715.4                                                     | 707.4                                                                                | 425.2                                                    | 420.2                                                                 | 243.1                                                 | 308.1                                                              | 215.1                                                    |
| CP-Arg | CP 992c  | 993.50                            | 975.5                               | 947.5                                  | 876.4                                               | 793.4                 | 776.4                                   | 758.4                                    | 715.4                                                     | 693.4                                                                                | 439.2                                                    | 420.2                                                                 | 243.1                                                 | 308.1                                                              | 215.1                                                    |
| CP-Arg | CP 1006  | 1007.52                           | 989.5                               | 961.5                                  | 890.4                                               | 793.4                 | 776.4                                   | 758.4                                    | 729.4                                                     | 693.4                                                                                | 453.2                                                    | 420.2                                                                 | 243.1                                                 | 308.1                                                              | 215.1                                                    |
| CP-Arg | CP 1008  | 1009.40                           | 991.5                               | 963.5                                  | 892.4                                               | 823.4                 | 806.4                                   | 788.4                                    | 731.4                                                     | 723.4                                                                                | 425.2                                                    | 450.2                                                                 | 243.1                                                 | 338.1                                                              | 215.1                                                    |
| CP-Arg | CP 1018  | 1019.56                           |                                     | 973.6                                  | 902.5                                               | 777.4                 | 760.4                                   | 742.4                                    | 741.4                                                     | 677.4                                                                                | 481.3                                                    | 404.2                                                                 | 243.1                                                 | 292.1                                                              | 215.1                                                    |
| CP-Arg | CP 1020b | 1021.54                           |                                     | 975.5                                  | 904.5                                               | 807.4                 | 790.4                                   | 772.4                                    | 743.4                                                     | 707.4                                                                                | 453.2                                                    | 434.2                                                                 | 243.1                                                 | 322.1                                                              | 215.1                                                    |
| CP-Arg | CP 1020  | 1021.54                           |                                     | 975.5                                  | 904.5                                               | 793.4                 | 776.4                                   | 758.4                                    | 743.4                                                     | 693.4                                                                                | 467.3                                                    | 420.2                                                                 | 243.1                                                 | 308.1                                                              | 215.1                                                    |
| CP-Arg | CP 1034  | 1035.55                           |                                     | 989.5                                  | 918.5                                               | 793.4                 | 776.4                                   | 758.4                                    | 757.4                                                     | 693.4                                                                                | 481.3                                                    | 420.2                                                                 | 243.1                                                 | 308.1                                                              | 215.1                                                    |
| CP-Arg | CP 1036  | 1037.53                           |                                     | 991.5                                  | 920.5                                               | 823.4                 | 806.4                                   | 788.4                                    | 759.4                                                     | 723.4                                                                                | 453.2                                                    | 450.2                                                                 | 243.1                                                 | 338.1                                                              | 215.1                                                    |
| CP-Arg | CP 1046  | 1047.59                           |                                     |                                        | 930.5                                               | 777.4                 | 760.4                                   | 742.4                                    | 769.5                                                     | 677.4                                                                                | 509.3                                                    | 404.2                                                                 | 243.1                                                 | 292.1                                                              | 215.1                                                    |
| CP-Arg | CP 1048  | 1049.57                           |                                     |                                        | 932.5                                               | 807.4                 | 790.4                                   | 772.4                                    | 771.4                                                     | 707.4                                                                                | 481.3                                                    | 434.2                                                                 | 243.1                                                 | 322.1                                                              | 215.1                                                    |
| CP-Arg | CP 1076  | 1077.60                           |                                     |                                        | 960.5                                               | 807.4                 | 790.4                                   | 772.4                                    | 799.5                                                     | 707.4                                                                                | 509.3                                                    | 434.2                                                                 | 243.1                                                 | 322.1                                                              | 215.1                                                    |

| Group  | Name     | ( <i>m/z</i> ) [M+H] <sup>+</sup> | [M+H-H <sub>2</sub> O] <sup>+</sup> | [M+H-H <sub>2</sub> O-CO] <sup>+</sup> | [M+H-X <sup>6</sup> -H <sub>2</sub> O] <sup>+</sup> | [M+H-SC] <sup>+</sup> | [M+2H-SC-H <sub>2</sub> O] <sup>+</sup> | [M+2H-SC-2H <sub>2</sub> O] <sup>+</sup> | [M+H-(Ahp+X <sup>4</sup> )-H <sub>2</sub> O] <sup>+</sup> | [X <sub>2</sub> +Ahp+X <sup>4</sup> +X <sup>5</sup> +X <sup>6</sup> +H] <sup>+</sup> | [SC+Thr+X <sup>2</sup> +H-H <sub>2</sub> O] <sup>+</sup> | [Ahp+X <sup>4</sup> +X <sup>5</sup> +H-H <sub>2</sub> O] <sup>+</sup> | [Ahp+X <sup>4</sup> +H-H <sub>2</sub> O] <sup>+</sup> | [X <sup>4</sup> +X <sup>5</sup> +2H-H <sub>2</sub> O] <sup>+</sup> | [Ahp+X <sup>4</sup> +H-CO-H <sub>2</sub> O] <sup>+</sup> |
|--------|----------|-----------------------------------|-------------------------------------|----------------------------------------|-----------------------------------------------------|-----------------------|-----------------------------------------|------------------------------------------|-----------------------------------------------------------|--------------------------------------------------------------------------------------|----------------------------------------------------------|-----------------------------------------------------------------------|-------------------------------------------------------|--------------------------------------------------------------------|----------------------------------------------------------|
| CP-Arg | CP 777   | 778.43                            | 760.4                               | 732.4                                  | 661.3                                               |                       |                                         |                                          | 500.3                                                     | 677.4                                                                                |                                                          | 404.2                                                                 | 243.1                                                 | 292.1                                                              | 215.1                                                    |
| CP-Arg | CP 807   | 808.44                            | 790.4                               | 762.4                                  | 691.4                                               |                       |                                         |                                          | 530.3                                                     | 707.4                                                                                |                                                          | 434.2                                                                 | 243.1                                                 | 322.1                                                              | 215.1                                                    |
| CP-Arg | CP 892   | 893.45                            | 875.4                               | 847.4                                  | 776.4                                               | 778.4                 | 761.4                                   | 743.4                                    | 615.3                                                     | 677.4                                                                                | 354.2                                                    | 404.2                                                                 | 243.1                                                 | 292.1                                                              | 215.1                                                    |
| CP-Arg | CP 922   | 923.46                            | 905.5                               | 877.5                                  | 806.4                                               | 808.4                 | 791.4                                   | 773.4                                    | 645.3                                                     | 707.4                                                                                | 354.2                                                    | 434.2                                                                 | 243.1                                                 | 322.1                                                              | 215.1                                                    |
| CP-Arg | CP 934   | 935.46                            | 917.5                               | 889.5                                  | 818.4                                               | 777.4                 | 760.4                                   | 742.4                                    | 657.3                                                     | 677.4                                                                                | 397.2                                                    | 404.2                                                                 | 243.1                                                 | 292.1                                                              | 215.1                                                    |
| CP-Arg | CP 944   | 945.51                            | 927.5                               | 899.5                                  | 828.4                                               | 759.4                 | 742.4                                   | 724.4                                    | 700.4                                                     | 660.4                                                                                | 425.2                                                    | 387.2                                                                 | 210.1                                                 | 274.1                                                              | 182.1                                                    |
| CP-Arg | CP 950   | 951.46                            | 933.4                               | 905.5                                  | 834.4                                               | 793.4                 | 776.4                                   | 758.4                                    | 673.3                                                     | 693.4                                                                                | 397.2                                                    | 420.2                                                                 | 243.1                                                 | 308.1                                                              | 215.1                                                    |
| CP-Arg | CP 962   | 963.49                            | 945.5                               | 917.5                                  | 846.4                                               | 777.4                 | 760.4                                   | 742.4                                    | 685.4                                                     | 677.4                                                                                | 425.2                                                    | 404.2                                                                 | 243.1                                                 | 292.1                                                              | 215.1                                                    |
| CP-Arg | CP 964   | 965.47                            | 947.5                               | 919.5                                  | 848.4                                               | 807.4                 | 790.4                                   | 772.4                                    | 687.3                                                     | 707.4                                                                                | 397.2                                                    | 434.2                                                                 | 243.1                                                 | 322.1                                                              | 215.1                                                    |
| CP-Arg | CP 976   | 977.51                            | 959.5                               | 931.5                                  | 846.4                                               | 791.4                 | 774.4                                   | 756.4                                    | 699.4                                                     | 691.4                                                                                | 425.2                                                    | 404.2                                                                 | 243.1                                                 | 292.1                                                              | 215.1                                                    |
| CP-Arg | CP 978   | 979.49                            | 961.5                               | 933.5                                  | 862.4                                               | 793.4                 | 776.4                                   | 758.4                                    | 701.4                                                     | 693.4                                                                                | 425.2                                                    | 420.2                                                                 | 243.1                                                 | 308.1                                                              | 215.1                                                    |
| CP-Arg | CP 990   | 991.52                            | 973.5                               | 945.5                                  | 874.4                                               | 777.4                 | 760.4                                   | 742.4                                    | 713.4                                                     | 677.4                                                                                | 453.2                                                    | 404.2                                                                 | 243.1                                                 | 292.1                                                              | 215.1                                                    |
| CP-Arg | CP 992   | 993.50                            | 975.5                               | 947.5                                  | 876.4                                               | 807.4                 | 790.4                                   | 772.4                                    | 715.4                                                     | 707.4                                                                                | 425.2                                                    | 434.2                                                                 | 243.1                                                 | 322.1                                                              | 215.1                                                    |
| CP-Arg | CP 992b  | 993.50                            | 975.5                               | 947.5                                  | 862.4                                               | 807.4                 | 790.4                                   | 772.4                                    | 715.4                                                     | 707.4                                                                                | 425.2                                                    | 420.2                                                                 | 243.1                                                 | 308.1                                                              | 215.1                                                    |
| CP-Arg | CP 992c  | 993.50                            | 975.5                               | 947.5                                  | 876.4                                               | 793.4                 | 776.4                                   | 758.4                                    | 715.4                                                     | 693.4                                                                                | 439.2                                                    | 420.2                                                                 | 243.1                                                 | 308.1                                                              | 215.1                                                    |
| CP-Arg | CP 1006  | 1007.52                           | 989.5                               | 961.5                                  | 890.4                                               | 793.4                 | 776.4                                   | 758.4                                    | 729.4                                                     | 693.4                                                                                | 453.2                                                    | 420.2                                                                 | 243.1                                                 | 308.1                                                              | 215.1                                                    |
| CP-Arg | CP 1008  | 1009.40                           | 991.5                               | 963.5                                  | 892.4                                               | 823.4                 | 806.4                                   | 788.4                                    | 731.4                                                     | 723.4                                                                                | 425.2                                                    | 450.2                                                                 | 243.1                                                 | 338.1                                                              | 215.1                                                    |
| CP-Arg | CP 1018  | 1019.56                           |                                     | 973.6                                  | 902.5                                               | 777.4                 | 760.4                                   | 742.4                                    | 741.4                                                     | 677.4                                                                                | 481.3                                                    | 404.2                                                                 | 243.1                                                 | 292.1                                                              | 215.1                                                    |
| CP-Arg | CP 1020b | 1021.54                           |                                     | 975.5                                  | 904.5                                               | 807.4                 | 790.4                                   | 772.4                                    | 743.4                                                     | 707.4                                                                                | 453.2                                                    | 434.2                                                                 | 243.1                                                 | 322.1                                                              | 215.1                                                    |
| CP-Arg | CP 1020  | 1021.54                           |                                     | 975.5                                  | 904.5                                               | 793.4                 | 776.4                                   | 758.4                                    | 743.4                                                     | 693.4                                                                                | 467.3                                                    | 420.2                                                                 | 243.1                                                 | 308.1                                                              | 215.1                                                    |
| CP-Arg | CP 1034  | 1035.55                           |                                     | 989.5                                  | 918.5                                               | 793.4                 | 776.4                                   | 758.4                                    | 757.4                                                     | 693.4                                                                                | 481.3                                                    | 420.2                                                                 | 243.1                                                 | 308.1                                                              | 215.1                                                    |
| CP-Arg | CP 1036  | 1037.53                           |                                     | 991.5                                  | 920.5                                               | 823.4                 | 806.4                                   | 788.4                                    | 759.4                                                     | 723.4                                                                                | 453.2                                                    | 450.2                                                                 | 243.1                                                 | 338.1                                                              | 215.1                                                    |
| CP-Arg | CP 1046  | 1047.59                           |                                     |                                        | 930.5                                               | 777.4                 | 760.4                                   | 742.4                                    | 769.5                                                     | 677.4                                                                                | 509.3                                                    | 404.2                                                                 | 243.1                                                 | 292.1                                                              | 215.1                                                    |
| CP-Arg | CP 1048  | 1049.57                           |                                     |                                        | 932.5                                               | 807.4                 | 790.4                                   | 772.4                                    | 771.4                                                     | 707.4                                                                                | 481.3                                                    | 434.2                                                                 | 243.1                                                 | 322.1                                                              | 215.1                                                    |
| CP-Arg | CP 1076  | 1077.60                           |                                     |                                        | 960.5                                               | 807.4                 | 790.4                                   | 772.4                                    | 799.5                                                     | 707.4                                                                                | 509.3                                                    | 434.2                                                                 | 243.1                                                 | 322.1                                                              | 215.1                                                    |

| Group    | Name     | ( <i>m/z</i> ) [M+H] <sup>+</sup> | [M+H-H <sub>2</sub> O] <sup>+</sup> | [M+H-H <sub>2</sub> O-CO] <sup>+</sup> | [M+H-X <sup>6</sup> -H <sub>2</sub> O] <sup>+</sup> | [M+2H-SC-H <sub>2</sub> O] <sup>+</sup> | [M+2H-SC-2H <sub>2</sub> O] <sup>+</sup> | [M+H-(Ahp+X <sup>4</sup> )-H <sub>2</sub> O] <sup>+</sup> | [X <sup>2</sup> +Ahp+X <sup>4</sup> +X <sup>5</sup> +X <sup>6</sup> +H] <sup>+</sup> | [SC+Thr+X <sup>2</sup> +H-H <sub>2</sub> O] <sup>+</sup> | [Ahp+X <sup>4</sup> +X <sup>5</sup> +H-H <sub>2</sub> O] <sup>+</sup> | [Ahp+X <sup>4</sup> +H-H <sub>2</sub> O] <sup>+</sup> | [X <sup>4</sup> +X <sup>5</sup> +2H-H <sub>2</sub> O] <sup>+</sup> | [Ahp+X <sup>4</sup> +H-CO-H <sub>2</sub> O] <sup>+</sup> |
|----------|----------|-----------------------------------|-------------------------------------|----------------------------------------|-----------------------------------------------------|-----------------------------------------|------------------------------------------|-----------------------------------------------------------|--------------------------------------------------------------------------------------|----------------------------------------------------------|-----------------------------------------------------------------------|-------------------------------------------------------|--------------------------------------------------------------------|----------------------------------------------------------|
| CP-Leu   | CP 891   | 874.44                            | 856.4                               | 846.4                                  | 775.4                                               | 717.4                                   | 699.4                                    | 614.3                                                     | 634.4                                                                                | 354.2                                                    | 404.2                                                                 | 243.1                                                 | 292.1                                                              | 215.1                                                    |
| CP-Leu   | CP 907   | 890.43                            | 872.4                               | 862.4                                  | 791.4                                               | 733.4                                   | 715.4                                    | 630.3                                                     | 650.4                                                                                | 354.2                                                    | 420.2                                                                 | 243.1                                                 | 308.1                                                              | 215.1                                                    |
| CP-Leu   | CP 919   | 902.47                            | 884.5                               | 874.5                                  | 803.4                                               | 717.4                                   | 699.4                                    | 642.4                                                     | 634.4                                                                                | 382.2                                                    | 404.2                                                                 | 243.1                                                 | 292.1                                                              | 215.1                                                    |
| CP-Leu   | CP 921   | 904.45                            | 886.4                               | 876.5                                  | 805.4                                               | 747.4                                   | 729.4                                    | 644.3                                                     | 664.4                                                                                | 354.2                                                    | 434.2                                                                 | 243.1                                                 | 322.1                                                              | 215.1                                                    |
| CP-Leu   | CP 933   | 916.48                            | 898.5                               | 888.5                                  | 817.4                                               | 717.4                                   | 699.4                                    | 656.4                                                     | 634.4                                                                                | 396.2                                                    | 404.2                                                                 | 243.1                                                 | 292.1                                                              | 215.1                                                    |
| CP-Leu   | CP 935   | 918.46                            | 900.5                               | 890.5                                  | 819.4                                               | 733.4                                   | 715.4                                    | 658.3                                                     | 650.4                                                                                | 382.2                                                    | 420.2                                                                 | 243.1                                                 | 308.1                                                              | 215.1                                                    |
| CP-Leu   | CP 947   | 930.50                            | 912.5                               | 902.5                                  | 831.4                                               | 717.4                                   | 699.4                                    | 670.4                                                     | 634.4                                                                                | 410.2                                                    | 404.2                                                                 | 243.1                                                 | 292.1                                                              | 215.1                                                    |
| CP-Leu   | CP 949   | 932.48                            | 914.5                               | 904.5                                  | 833.4                                               | 747.4                                   | 729.4                                    | 672.4                                                     | 664.4                                                                                | 382.2                                                    | 434.2                                                                 | 243.1                                                 | 322.1                                                              | 215.1                                                    |
| CP-Leu   | CP 963b  | 946.49                            | 928.5                               | 918.5                                  | 847.4                                               | 747.4                                   | 729.4                                    | 686.4                                                     | 664.4                                                                                | 396.2                                                    | 434.2                                                                 | 243.1                                                 | 322.1                                                              | 215.1                                                    |
| CP-Leu   | CP 963   | 946.49                            | 928.5                               | 918.5                                  | 847.4                                               | 733.4                                   | 715.4                                    | 686.4                                                     | 650.4                                                                                | 410.2                                                    | 420.2                                                                 | 243.1                                                 | 308.1                                                              | 215.1                                                    |
| CP-Leu   | CP 965b  | 948.47                            | 930.5                               | 920.5                                  | 849.4                                               | 763.4                                   | 745.4                                    | 688.4                                                     | 680.4                                                                                | 382.2                                                    | 450.2                                                                 | 243.1                                                 | 338.1                                                              | 215.1                                                    |
| CP-Leu   | CP 975   | 958.53                            | 940.5                               | 930.5                                  | 859.5                                               | 717.4                                   | 699.4                                    | 698.4                                                     | 634.4                                                                                | 438.3                                                    | 404.2                                                                 | 243.1                                                 | 292.1                                                              | 215.1                                                    |
| CP-Leu   | CP 977   | 960.51                            | 942.5                               | 932.5                                  | 861.4                                               | 747.4                                   | 729.4                                    | 700.4                                                     | 664.4                                                                                | 410.2                                                    | 434.2                                                                 | 243.1                                                 | 322.1                                                              | 215.1                                                    |
| CP-Leu   | CP 991   | 974.52                            | 956.5                               | 946.5                                  | 875.5                                               | 733.4                                   | 715.4                                    | 714.4                                                     | 650.4                                                                                | 438.3                                                    | 420.2                                                                 | 243.1                                                 | 308.1                                                              | 215.1                                                    |
| CP-Leu   | CP 1005  | 988.54                            | 970.5                               | 960.5                                  | 889.5                                               | 747.4                                   | 729.4                                    | 728.4                                                     | 664.4                                                                                | 438.3                                                    | 434.2                                                                 | 243.1                                                 | 322.1                                                              | 215.1                                                    |
| CP-MeLeu | CP 933b  | 916.48                            | 898.5                               | 888.5                                  | 817.4                                               | 731.4                                   | 713.4                                    | 656.4                                                     | 648.4                                                                                | 396.2                                                    | 404.2                                                                 | 243.1                                                 | 292.1                                                              | 215.1                                                    |
| CP-MeLeu | CP 949b  | 932.48                            | 914.5                               | 904.5                                  | 833.4                                               | 747.4                                   | 729.4                                    | 672.4                                                     | 664.4                                                                                | 396.2                                                    | 420.2                                                                 | 243.1                                                 | 308.1                                                              | 215.1                                                    |
| CP-MePhe | CP 939b  | 922.44                            | 904.4                               | 894.4                                  | 823.4                                               | 765.4                                   | 747.4                                    | 662.3                                                     | 682.4                                                                                | 402.2                                                    | 404.2                                                                 | 243.1                                                 | 292.1                                                              | 215.1                                                    |
| CP-MePhe | CP 967b  | 950.47                            | 932.5                               | 922.5                                  | 851.4                                               | 765.4                                   | 747.4                                    | 690.4                                                     | 682.4                                                                                | 430.2                                                    | 404.2                                                                 | 243.1                                                 | 292.1                                                              | 215.1                                                    |
| CP-MePhe | CP 1011c | 994.49                            | 976.5                               | 966.5                                  | 895.4                                               | 781.4                                   | 763.4                                    | 734.4                                                     | 698.4                                                                                | 458.2                                                    | 420.2                                                                 | 243.1                                                 | 308.1                                                              | 215.1                                                    |
| CP-Met   | CP 937   | 920.42                            | 902.4                               | 892.4                                  | 821.4                                               | 735.4                                   | 717.3                                    | 660.3                                                     | 652.3                                                                                | 400.2                                                    | 404.2                                                                 | 243.1                                                 | 292.1                                                              | 215.1                                                    |
| CP-Met   | CP 939   | 922.40                            | 904.4                               | 894.4                                  | 823.3                                               | 765.4                                   | 747.4                                    | 662.3                                                     | 682.3                                                                                | 372.1                                                    | 434.2                                                                 | 243.1                                                 | 322.1                                                              | 215.1                                                    |
| CP-Met   | CP 953b  | 936.42                            | 918.4                               | 908.4                                  | 837.3                                               | 751.3                                   | 733.3                                    | 676.3                                                     | 668.3                                                                                | 400.2                                                    | 420.2                                                                 | 243.1                                                 | 308.1                                                              | 215.1                                                    |
| CP-Met   | CP 995   | 978.46                            | 960.5                               | 950.5                                  | 879.4                                               | 765.4                                   | 747.4                                    | 718.3                                                     | 682.3                                                                                | 428.2                                                    | 434.2                                                                 | 243.1                                                 | 322.1                                                              | 215.1                                                    |
| CP-Met   | CP 1023  | 1006.50                           | 988.5                               | 978.5                                  | 907.4                                               | 765.4                                   | 747.4                                    | 746.4                                                     | 682.3                                                                                | 456.2                                                    | 434.2                                                                 | 243.1                                                 | 322.1                                                              | 215.1                                                    |

|          |          |         |       |       |       |       |       |       |       |       |       |       |       |       |
|----------|----------|---------|-------|-------|-------|-------|-------|-------|-------|-------|-------|-------|-------|-------|
| CP-MeTyr | CP 999d  | 982.46  | 964.4 | 954.5 | 883.4 | 797.4 | 779.4 | 722.3 | 714.4 | 446.2 | 420.2 | 243.1 | 308.1 | 215.1 |
| CP-MeTyr | CP 1014  | 997.12  | 979.1 | 969.1 | 898.1 | 812.1 | 794.0 | 737.0 | 728.4 | 446.2 | 434.2 | 243.1 | 322.1 | 215.1 |
| CP-Phe   | CP 925   | 908.42  | 890.4 | 880.4 | 809.4 | 751.4 | 733.4 | 648.3 | 668.3 | 388.2 | 404.2 | 243.1 | 292.1 | 215.1 |
| CP-Phe   | CP 953   | 936.45  | 918.4 | 908.5 | 837.4 | 751.4 | 733.4 | 676.3 | 668.3 | 416.2 | 404.2 | 243.1 | 292.1 | 215.1 |
| CP-Phe   | CP 955   | 938.43  | 920.4 | 910.4 | 839.4 | 781.4 | 763.4 | 678.3 | 698.4 | 388.2 | 434.2 | 243.1 | 322.1 | 215.1 |
| CP-Phe   | CP 967   | 950.47  | 932.5 | 922.5 | 837.4 | 765.4 | 747.4 | 690.4 | 682.4 | 416.2 | 404.2 | 243.1 | 292.1 | 215.1 |
| CP-Phe   | CP 969b  | 952.45  | 934.4 | 924.5 | 853.4 | 767.4 | 749.4 | 692.3 | 684.3 | 416.2 | 420.2 | 243.1 | 308.1 | 215.1 |
| CP-Phe   | CP 981   | 964.48  | 946.5 | 936.5 | 865.4 | 751.4 | 733.4 | 704.4 | 668.3 | 444.2 | 404.2 | 243.1 | 292.1 | 215.1 |
| CP-Phe   | CP 983   | 966.46  | 948.5 | 938.5 | 867.4 | 781.4 | 763.4 | 706.3 | 698.4 | 416.2 | 434.2 | 243.1 | 322.1 | 215.1 |
| CP-Phe   | CP 997   | 980.48  | 962.5 | 952.5 | 881.4 | 767.4 | 749.4 | 720.4 | 684.3 | 444.2 | 420.2 | 243.1 | 308.1 | 215.1 |
| CP-Phe   | CP 1011  | 994.49  | 976.5 | 966.5 | 895.4 | 781.4 | 763.4 | 734.4 | 698.4 | 444.2 | 434.2 | 243.1 | 322.1 | 215.1 |
| CP-Phe   | CP 1025b | 1008.51 | 990.5 | 980.5 | 909.4 | 767.4 | 749.4 | 748.4 | 684.3 | 472.2 | 420.2 | 243.1 | 308.1 | 215.1 |
| CP-Trp   | CP 992d  | 975.46  | 957.5 | 947.5 | 876.4 | 790.4 | 772.4 | 715.3 | 707.4 | 455.2 | 404.2 | 243.1 | 292.1 | 215.1 |
| CP-Trp   | CP 1036c | 1019.49 |       | 991.5 | 920.4 | 806.4 | 788.4 | 759.4 | 723.4 | 483.2 | 420.2 | 243.1 | 308.1 | 215.1 |
| CP-Trp   | CP 1050  | 1033.50 |       |       | 934.4 | 820.4 | 802.4 | 773.4 | 737.4 | 483.2 | 434.2 | 243.1 | 322.1 | 215.1 |
| CP-Tyr   | CP 929   | 912.41  | 894.4 | 884.4 | 813.3 | 798.4 | 780.4 | 652.3 | 714.4 | 361.1 | 434.2 | 243.1 | 322.1 | 215.1 |
| CP-Tyr   | CP 941   | 924.41  | 906.4 | 896.4 | 825.3 | 767.4 | 749.4 | 664.3 | 684.3 | 404.1 | 404.2 | 243.1 | 292.1 | 215.1 |
| CP-Tyr   | CP 957   | 940.41  | 922.4 | 912.4 | 841.3 | 783.4 | 765.4 | 680.3 | 700.3 | 404.1 | 420.2 | 243.1 | 308.1 | 215.1 |
| CP-Tyr   | CP 965   | 948.47  | 930.5 | 920.5 | 849.4 | 763.4 | 745.4 | 722.3 | 680.4 | 432.2 | 400.2 | 209.1 | 288.1 | 181.1 |
| CP-Tyr   | CP 969   | 952.45  | 934.4 | 924.5 | 853.4 | 767.4 | 749.4 | 692.3 | 684.3 | 432.2 | 404.2 | 243.1 | 292.1 | 215.1 |
| CP-Tyr   | CP 971   | 954.42  | 936.4 | 926.4 | 855.4 | 797.4 | 779.4 | 694.3 | 714.4 | 404.1 | 434.2 | 243.1 | 322.1 | 215.1 |
| CP-Tyr   | CP 983b  | 966.46  | 948.5 | 938.5 | 853.4 | 781.4 | 763.4 | 706.3 | 698.4 | 432.2 | 404.2 | 243.1 | 292.1 | 215.1 |
| CP-Tyr   | CP 983c  | 966.46  | 948.5 | 938.5 | 867.4 | 767.4 | 749.4 | 706.3 | 684.3 | 446.2 | 404.2 | 243.1 | 292.1 | 215.1 |
| CP-Tyr   | CP 985   | 968.44  | 950.4 | 940.4 | 869.4 | 783.4 | 765.4 | 708.3 | 700.3 | 432.2 | 420.2 | 243.1 | 308.1 | 215.1 |
| CP-Tyr   | CP 993   | 976.50  | 958.5 | 948.5 | 877.4 | 763.4 | 745.4 | 750.4 | 680.4 | 460.2 | 400.2 | 209.1 | 288.1 | 181.1 |
| CP-Tyr   | CP 997b  | 980.48  | 962.5 | 952.5 | 881.4 | 767.4 | 749.4 | 720.4 | 684.3 | 460.2 | 404.2 | 243.1 | 292.1 | 215.1 |
| CP-Tyr   | CP 999   | 982.46  | 964.4 | 954.5 | 883.4 | 797.4 | 779.4 | 722.3 | 714.4 | 432.2 | 434.2 | 243.1 | 322.1 | 215.1 |
| CP-Tyr   | CP 999b  | 982.46  | 964.4 | 954.5 | 869.4 | 797.4 | 779.4 | 722.3 | 714.4 | 432.2 | 420.2 | 243.1 | 308.1 | 215.1 |
| CP-Tyr   | CP 999c  | 982.46  | 964.4 | 954.5 | 883.4 | 783.4 | 765.4 | 722.3 | 700.3 | 446.2 | 420.2 | 243.1 | 308.1 | 215.1 |
| CP-Tyr   | CP 1011b | 994.49  | 976.5 | 966.5 | 881.4 | 781.4 | 763.4 | 734.4 | 698.4 | 460.2 | 404.2 | 243.1 | 292.1 | 215.1 |
| CP-Tyr   | CP 1013b | 996.37  | 978.5 | 968.5 | 883.4 | 811.4 | 793.4 | 736.4 | 728.4 | 432.2 | 434.2 | 243.1 | 322.1 | 215.1 |
| CP-Tyr   | CP 1013  | 996.47  | 978.5 | 968.5 | 897.4 | 783.4 | 765.4 | 736.4 | 700.3 | 460.2 | 420.2 | 243.1 | 308.1 | 215.1 |
| CP-Tyr   | CP 1013c | 996.47  | 978.5 | 968.5 | 897.4 | 797.4 | 779.4 | 736.4 | 714.4 | 446.2 | 434.2 | 243.1 | 322.1 | 215.1 |

|        |          |         |       |       |       |       |       |       |       |       |       |       |       |       |
|--------|----------|---------|-------|-------|-------|-------|-------|-------|-------|-------|-------|-------|-------|-------|
| CP-Tyr | CP 1016  | 999.01  | 981.0 | 971.0 | 899.9 | 813.9 | 795.9 | 738.9 | 730.3 | 432.2 | 450.2 | 243.1 | 338.1 | 215.1 |
| CP-Tyr | CP 1025  | 1008.51 | 990.5 | 980.5 | 909.4 | 767.4 | 749.4 | 748.4 | 684.3 | 488.2 | 404.2 | 243.1 | 292.1 | 215.1 |
| CP-Tyr | CP 1027  | 1010.49 | 992.5 | 982.5 | 911.4 | 797.4 | 779.4 | 750.4 | 714.4 | 460.2 | 434.2 | 243.1 | 322.1 | 215.1 |
| CP-Tyr | CP 1036b | 1019.49 |       | 991.5 | 920.4 | 806.4 | 788.4 | 759.4 | 723.4 | 460.2 | 443.2 | 243.1 | 331.1 | 215.1 |
| CP-Tyr | CP 1041  | 1024.50 |       | 996.5 | 925.4 | 783.4 | 765.4 | 764.4 | 700.3 | 488.2 | 420.2 | 243.1 | 308.1 | 215.1 |
| CP-Tyr | CP 1053  | 1036.54 |       |       | 937.5 | 767.4 | 749.4 | 776.4 | 684.3 | 516.3 | 404.2 | 243.1 | 292.1 | 215.1 |
| CP-Tyr | CP 1055  | 1038.52 |       |       | 939.5 | 797.4 | 779.4 | 778.4 | 714.4 | 488.2 | 434.2 | 243.1 | 322.1 | 215.1 |
| CP-Tyr | CP 1069  | 1052.53 |       |       | 953.5 | 783.4 | 765.4 | 792.4 | 700.3 | 516.3 | 420.2 | 243.1 | 308.1 | 215.1 |
| CP-Tyr | CP 1083  | 1066.55 |       |       | 967.5 | 797.4 | 779.4 | 806.4 | 714.4 | 516.3 | 434.2 | 243.1 | 322.1 | 215.1 |
| CP-Tyr | CP 1097  | 1080.57 |       |       | 981.5 | 797.4 | 779.4 | 820.4 | 700.3 | 530.3 | 420.2 | 243.1 | 308.1 | 215.1 |

---

Table S4. NMR Spectroscopic Data for cyanopeptolin CP 941 – AC-Asp-[Thr-Tyr-Ahp-Phe-MePhe-Val].

| Residue | Position         | $\delta_C$ | $\delta_H$ (J in Hz)  | ROESY          | HMBC <sup>a</sup>   |
|---------|------------------|------------|-----------------------|----------------|---------------------|
| Ac      | 1                | 169.4      |                       |                |                     |
|         | 2                | 23.1       | 1.84, s               |                | Ac-1                |
| Asp     | 1                | <i>nd</i>  |                       |                |                     |
|         | 2                | 50.5       | 4.48, m               | Thr-NH         |                     |
|         | 3a               | 37.7       | 2.35, m               |                |                     |
|         | 3b               |            | 2.22, m               |                |                     |
|         | 4                | <i>nd</i>  |                       |                |                     |
|         | NH               |            | 8.63, m               |                |                     |
| Thr     | 1                | 169.3      |                       |                |                     |
|         | 2                | 54.8       | 4.51, d (9.9)         | Tyr-NH         | Thr-1               |
|         | 3                | 72.8       | 5.35, q (6.8)         | Tyr-NH         |                     |
|         | 4                | 17.8       | 1.11, d (6.6)         |                | Thr-2, Thr-3        |
|         | NH               |            | 7.68, d (9.6)         | Asp-2          |                     |
| Tyr     | 1                | <i>nd</i>  |                       |                |                     |
|         | 2                | 54.5       | 4.26, m               | Asp-NH         |                     |
|         | 3a               | 35.4       | 3.13, dd (10.2, 3.7)  | Tyr-2'/6'      |                     |
|         | 3b               |            | 2.43 <sup>b</sup> , m | Tyr-2'/6'      |                     |
|         | 1'               | 128.2      |                       |                |                     |
|         | 2'/6'            | 130.0      | 6.86, d (8.2)         | Tyr-3a, Tyr-3b | Tyr-4'              |
|         | 3'/5'            | 115.8      | 6.54, d (8.2)         |                | Tyr-1'              |
|         | 4'               | 156.7      |                       |                |                     |
|         | NH               |            | 8.41, d (8.9)         | Thr-2, Thr-3   |                     |
| Ahp     | 1                | <i>nd</i>  |                       |                |                     |
|         | 2                | 49.2       | 3.63, m               |                |                     |
|         | 3a               | 21.9       | 2.41 <sup>b</sup> , m |                |                     |
|         | 3b               |            | 1.60, m               |                |                     |
|         | 4a               | 29.7       | 1.69 <sup>c</sup> , m | Phe-2'/6'      |                     |
|         | 4b               |            | 1.50, m               | Phe-2'/6'      |                     |
|         | 5                | 74.2       | 5.04, brs             |                |                     |
|         | NH               |            | 7.05, d (9.2)         | Tyr-2          |                     |
|         | OH               |            | 5.98                  |                |                     |
| Phe     | 1                | 170.7      |                       |                |                     |
|         | 2                | 50.5       | 4.74, dd (6.9, 4.4)   | Phe-2'/6'      |                     |
|         | 3a               | 35.7       | 2.84 <sup>d</sup> , m | Phe-2'/6'      |                     |
|         | 3b               |            | 1.69 <sup>c</sup> , m |                |                     |
|         | 1'               | 137.2      |                       |                |                     |
|         | 2'/6'            | 129.8      | 6.78, d (7.3)         | Phe-2, Phe-3a, | Phe-3, Phe-4'       |
|         | 3'/5'            | 128.2      | 7.19, t (7.4)         | Ahp-4a, Ahp-4b | Phe-1'              |
|         | 4'               | 126.7      | 7.14, t (7.3)         |                | Phe-2'/6'           |
| MePhe   | 1                | <i>nd</i>  |                       |                |                     |
|         | 2                | 61.0       | 5.00, dd (9.1, 2.2)   | MePhe-2'/6',   |                     |
|         | 3a               | 34.3       | 3.23, m               | Val-NH         |                     |
|         | 3b               |            | 2.83 <sup>d</sup> , m | MePhe-2'/6'    |                     |
|         | 1'               | 138.3      |                       | MePhe-2'/6'    |                     |
|         | 2'/6'            | 130.0      | 7.25, d (7.3)         |                | MePhe-4', MePhe-3   |
|         | 3'/5'            | 129.1      | 7.41, t (7.7)         | MePhe-2,       | MePhe-1'            |
|         | 4'               | 127.1      | 7.31, t (7.4)         | MePhe-3a,      | MePhe-2'/6'         |
|         | NCH <sub>3</sub> | 30.9       | 2.79, s               | MePhe-3b       | MePhe-2, Phe-1      |
| Val     | 1                | <i>nd</i>  |                       |                |                     |
|         | 2                | 56.4       | 4.63, dd (4.9, 4.3)   |                |                     |
|         | 3                | 31.4       | 2.03, m               |                |                     |
|         | 4                | 19.7       | 0.86, d (6.8)         |                | Val-2, Val-3, Val-5 |
|         | 5                | 17.8       | 0.73, d (6.8)         |                | Val-2, Val-3, Val-4 |
|         | NH               |            | 7.39, d (9.6)         | MePhe-2        |                     |

<sup>a</sup> HMBC correlations are given from proton(s) stated to the indicated carbon atom; <sup>b-d</sup> assignments with the same superscript are overlapping; *nd* – resonances not detected

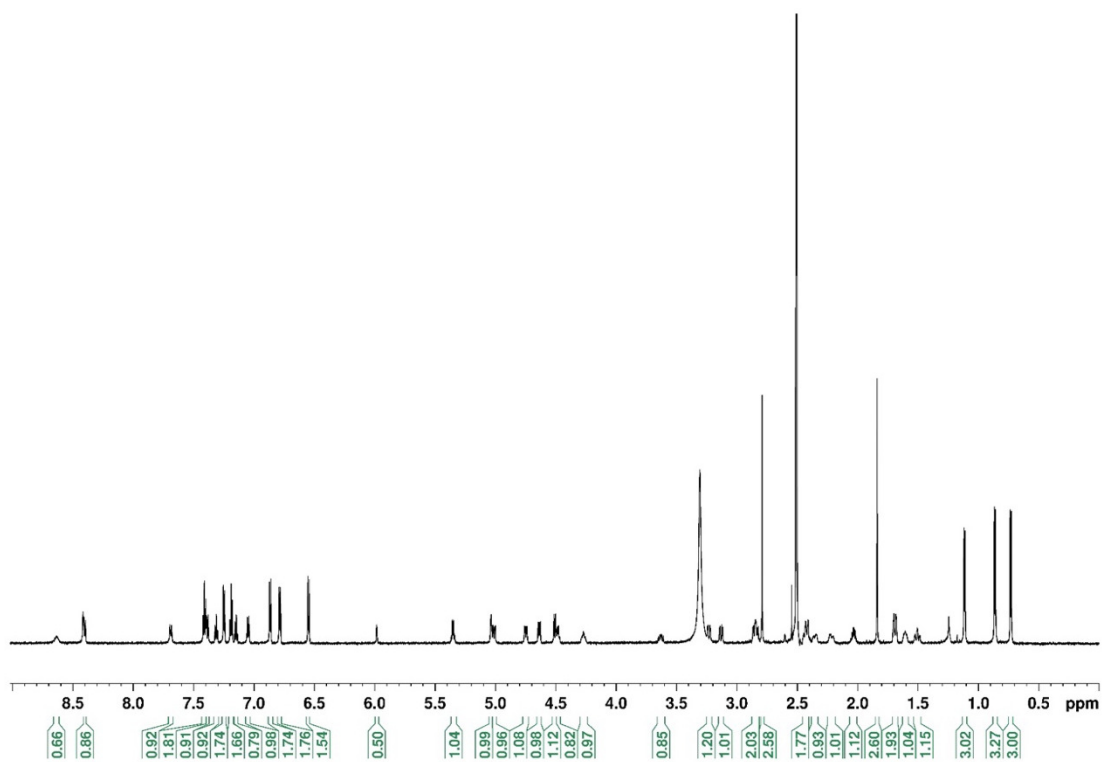

Figure S88. <sup>1</sup>H NMR spectrum of cyanopeptolin CP 941 in DMSO-d<sub>6</sub>.

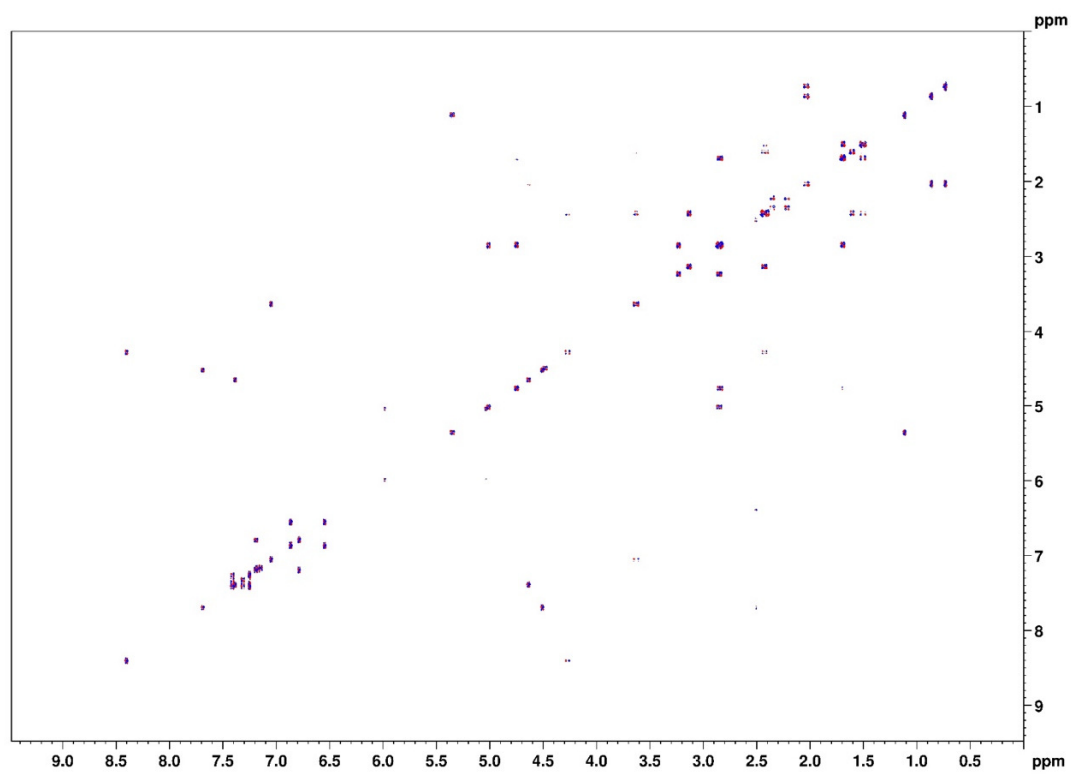

Figure S89. DQF-COSY spectrum of cyanopeptolin CP 941 in DMSO-d<sub>6</sub>.



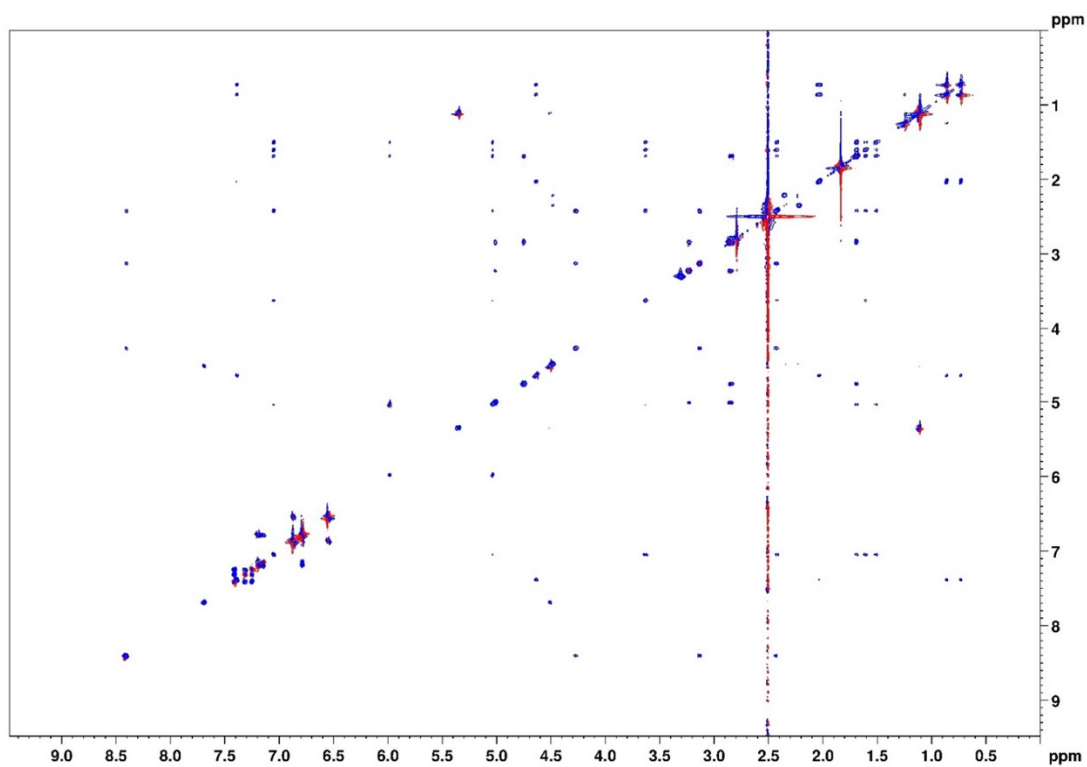

Figure S90. TOCSY spectrum of cyanopeptolin CP 941 in DMSO-d<sub>6</sub>.

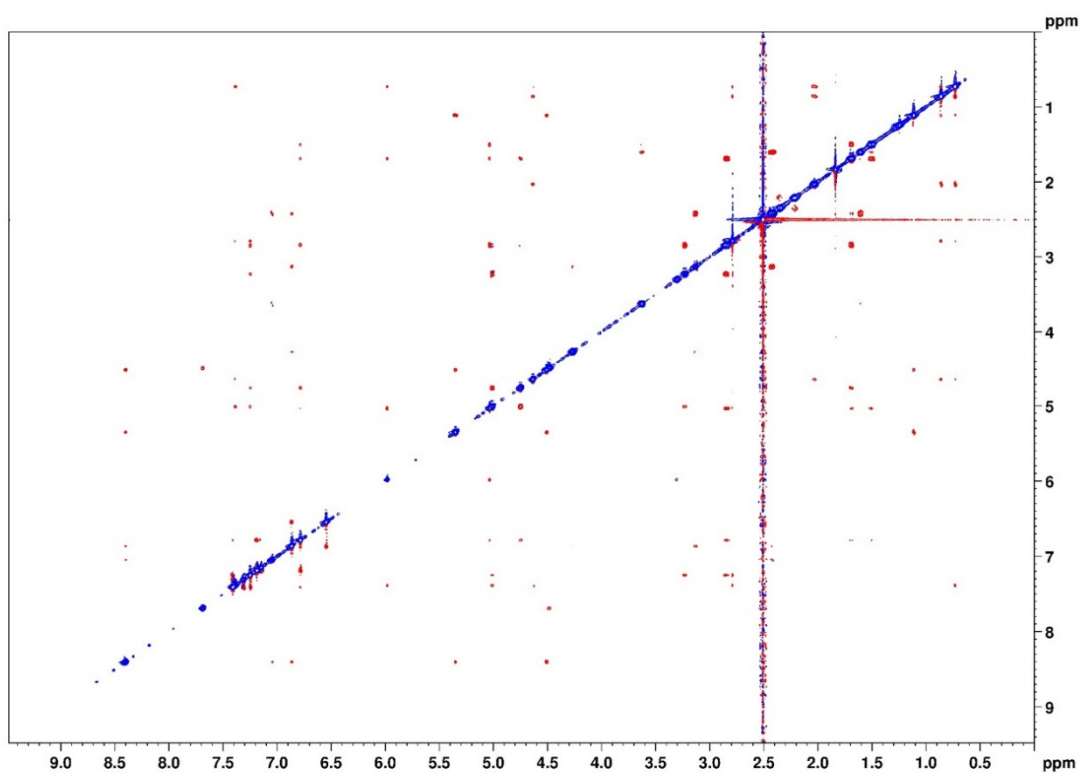

Figure S91. ROESY spectrum of cyanopeptolin CP 941 in DMSO-d<sub>6</sub>.

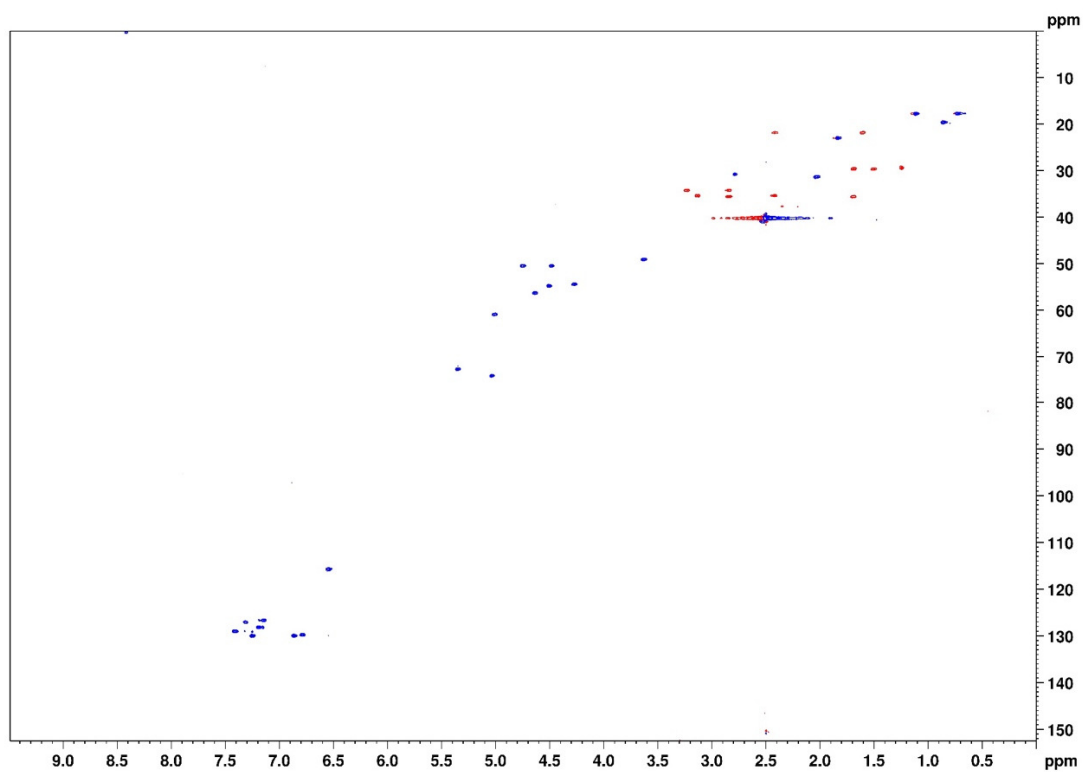

Figure S92. HSQC spectrum of cyanopeptolin CP 941 in DMSO-d<sub>6</sub>.

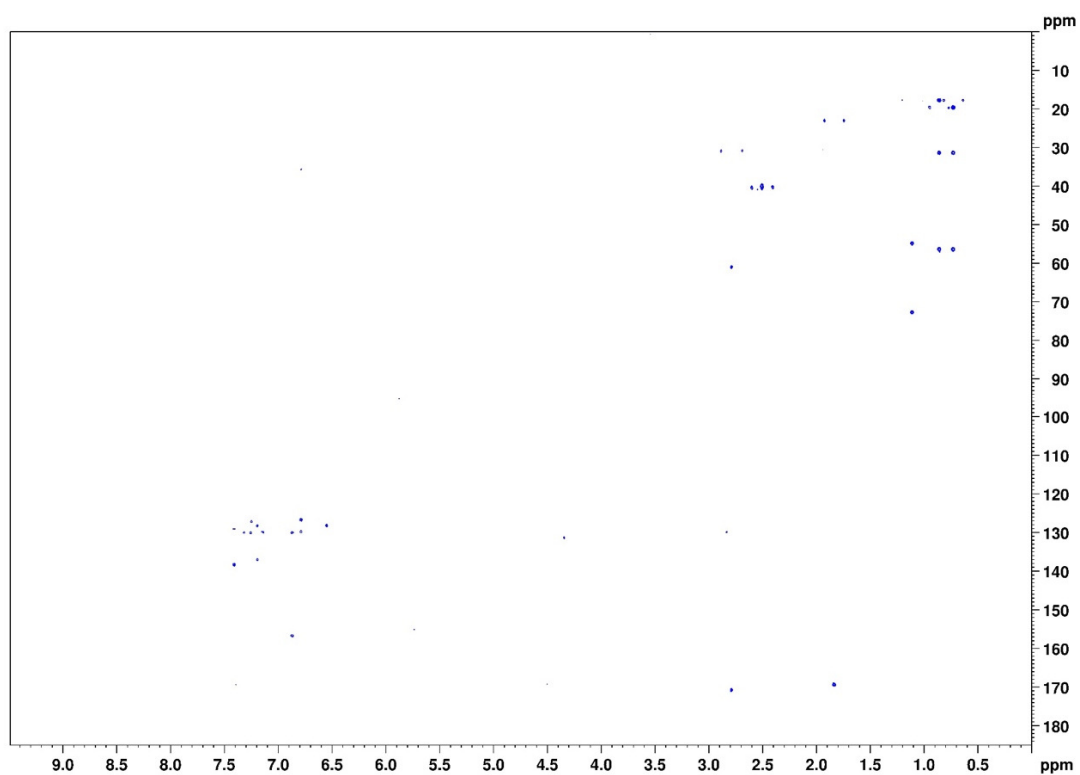

Figure S93. HMBC spectrum of cyanopeptolin CP 941 in DMSO-d<sub>6</sub>.

Table S5. NMR Spectroscopic Data for cyanopeptolin CP 999 – BA-Asp-[Thr-Tyr-Ahp-Phe-MeTyr(OMe)-Val].

| Residue   | Position         | $\delta_C$ | $\delta_H$ ( $J$ in Hz) | ROESY                  | HMBC <sup>a</sup>           |
|-----------|------------------|------------|-------------------------|------------------------|-----------------------------|
| BA        | 1                | 172        |                         |                        |                             |
|           | 2                | 37.9       | 2.05, t (7.0)           |                        | BA-1, BA-3, BA-4            |
|           | 3                | 19.2       | 1.53, q (7.3)           |                        | BA-1, BA-2, BA-4            |
|           | 4                | 14.1       | 0.88, t (7.3)           |                        | BA-2, BA-3                  |
| Asp       | 1                | <i>nd</i>  |                         |                        |                             |
|           | 2                | 50.6       | 4.47, m                 | Thr-NH                 |                             |
|           | 3a               | 38.7       | 2.30, m                 |                        |                             |
|           | 3b               |            | 2.12, m                 |                        |                             |
|           | 4                | <i>nd</i>  |                         |                        |                             |
| Thr       | NH               |            | 8.77, m                 |                        |                             |
|           | 1                | <i>nd</i>  |                         |                        |                             |
|           | 2                | 54.7       | 4.54, d (9.9)           | Tyr-NH                 |                             |
|           | 3                | 72.8       | 5.35, m                 | Tyr-NH                 |                             |
|           | 4                | 17.6       | 1.11, d (6.5)           |                        | Thr-2, Thr-3                |
| Tyr       | NH               |            | 7.68, d (8.5)           | Asp-2                  |                             |
|           | 1                | <i>nd</i>  |                         |                        |                             |
|           | 2                | 54.7       | 4.22, m                 | Ahp-NH                 |                             |
|           | 3a               | 35.6       | 3.13, dd (10.4, 3.6)    | Tyr-2'/6'              |                             |
|           | 3b               |            | 2.38, m                 | Tyr-2'/6'              |                             |
| Ahp       | 1'               | 128.0      |                         |                        |                             |
|           | 2'/6'            | 129.9      | 6.84, d (8.5)           | Tyr-3a, Tyr-3b         | Tyr-3, Tyr-4'               |
|           | 3'/5'            | 115.9      | 6.53, d (8.0)           |                        | Tyr-1'                      |
|           | 4'               | 156.9      |                         |                        |                             |
|           | NH               |            | 8.42, d (9.3)           | Thr-2, Thr-3           |                             |
| Phe       | 1                | <i>nd</i>  |                         |                        |                             |
|           | 2                | 49.1       | 3.67, m                 |                        |                             |
|           | 3a               | 21.9       | 2.44, m                 |                        |                             |
|           | 3b               |            | 1.61, m                 |                        |                             |
|           | 4a               | 29.7       | 1.71, m                 |                        |                             |
|           | 4b               |            | 1.54, m                 | Phe-2'/6'              |                             |
|           | 5                | 74.2       | 5.06, brs               | Phe-3a                 |                             |
|           | NH               |            | 7.03, d (9.3)           | Tyr-2                  |                             |
| N,O-MeTyr | OH               |            | 6.01                    |                        |                             |
|           | 1                | 170.9      |                         |                        |                             |
|           | 2                | 50.7       | 4.70, dd (6.8, 4.5)     | MeTyr(OMe)-2           |                             |
|           | 3a               | 35.8       | 2.87, dd (2.3, 11.8)    | Ahp-5, Phe-2'/6'       | Phe-2'/6'                   |
|           | 3b               |            | 1.79, dd (10.5, 3.8)    | Phe-2'/6'              |                             |
|           | 1'               | 137.2      |                         |                        |                             |
|           | 2'/6'            | 129.7      | 6.79, d (7.2)           | Phe-3a, Phe-3b, Ahp-4b | Phe-3, Phe-4'               |
|           | 3'/5'            | 128.2      | 7.19, t (7.5)           |                        | Phe-1', Phe-2'/6'           |
| Val       | 4'               | 126.7      | 7.15 <sup>b</sup>       |                        | Phe-2'/6'                   |
|           | 1                | 169.5      |                         |                        |                             |
|           | 2                | 61.3       | 4.91, dd (8.9, 2.4)     | Phe-2, Val-NH          |                             |
|           | 3a               | 33.3       | 3.18, m                 | MeTyr(OMe)-2'/6'       |                             |
|           | 3b               |            | 2.76, m                 | MeTyr(OMe)-2'/6'       |                             |
|           | 1'               | 129.9      |                         |                        |                             |
|           | 2'/6'            | 131.0      | 7.14 <sup>b</sup>       | MeTyr(OMe)-3a,         | MeTyr(OMe)-3, MeTyr(OMe)-4' |
|           | 3'/5'            | 114.5      | 6.97, d (8.8)           | MeTyr(OMe)-3b          | MeTyr(OMe)-1'               |
| Val       | 4'               | 158.6      |                         |                        |                             |
|           | OCH <sub>3</sub> | 55.5       | 3.71, s                 |                        | MeTyr(OMe)-4'               |
|           | NCH <sub>3</sub> | 30.8       | 2.77, s                 |                        | MeTyr(OMe)-2, Phe-1         |
|           | 1                | <i>nd</i>  |                         |                        |                             |
|           | 2                | 56.2       | 4.61, dd (5.0, 4.5)     |                        |                             |
|           | 3                | 31.3       | 2.02, m                 |                        |                             |
|           | 4                | 19.8       | 0.86, d (6.8)           |                        | Val-2, Val-3, Val-5         |
|           | 5                | 17.7       | 0.73, d (6.8)           |                        | Val-2, Val-3, Val-4         |
|           | NH               |            | 7.37, d (9.5)           |                        | MeTyr(OMe)-1                |

<sup>a</sup> HMBC correlations are given from proton(s) stated to the indicated carbon atom; <sup>b</sup> assignments with the same superscript are overlapping; *nd* – resonances not detected

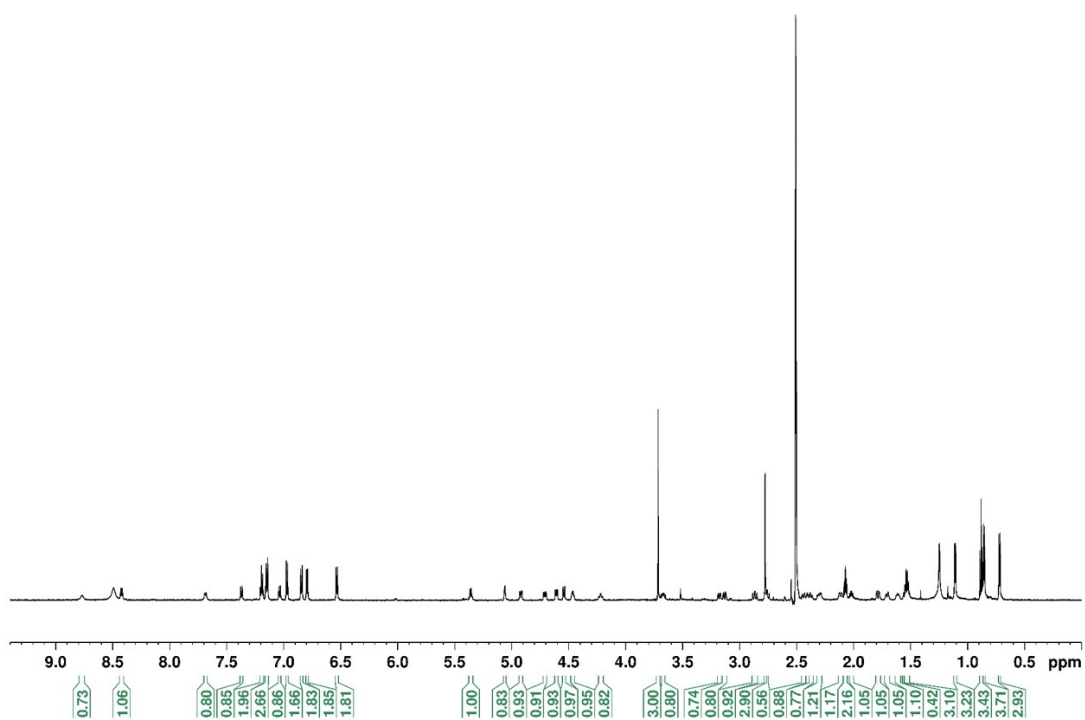

Figure S94.  $^1\text{H}$  NMR spectrum of cyanopeptolin CP 999 in  $\text{DMSO-d}_6$ .

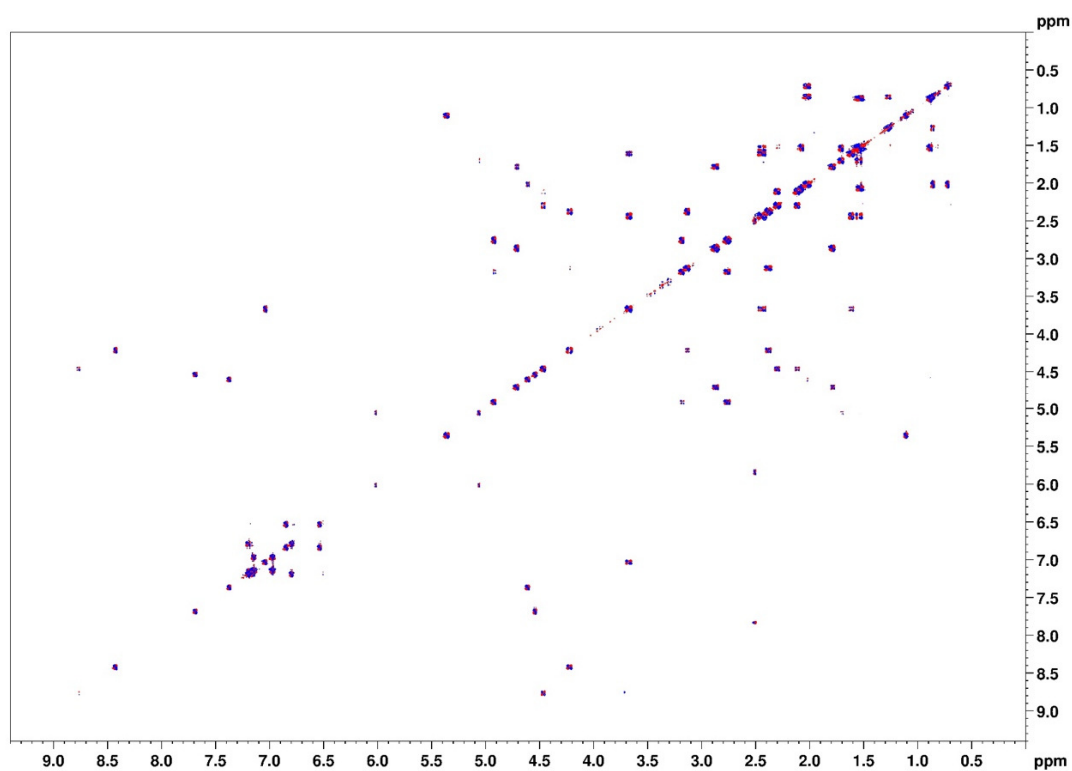

Figure S95. DQF-COSY spectrum of cyanopeptolin CP 999 in  $\text{DMSO-d}_6$ .

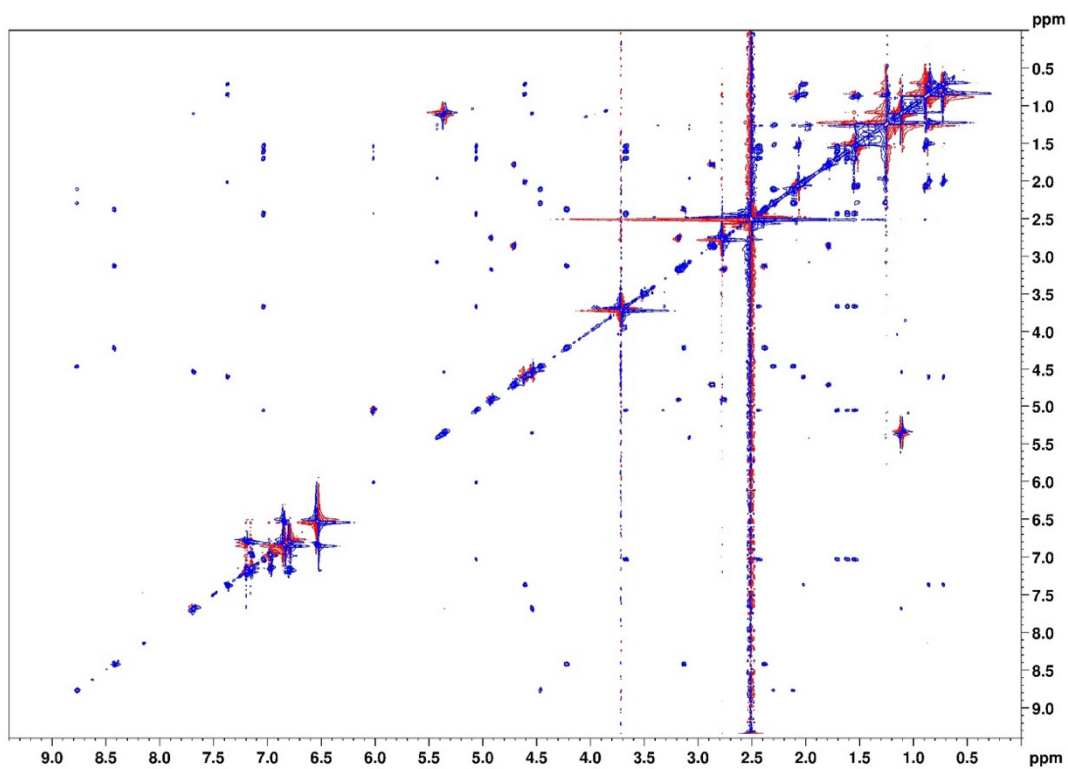

Figure S96. TOCSY spectrum of cyanopeptolin CP 999 in DMSO-d<sub>6</sub>.

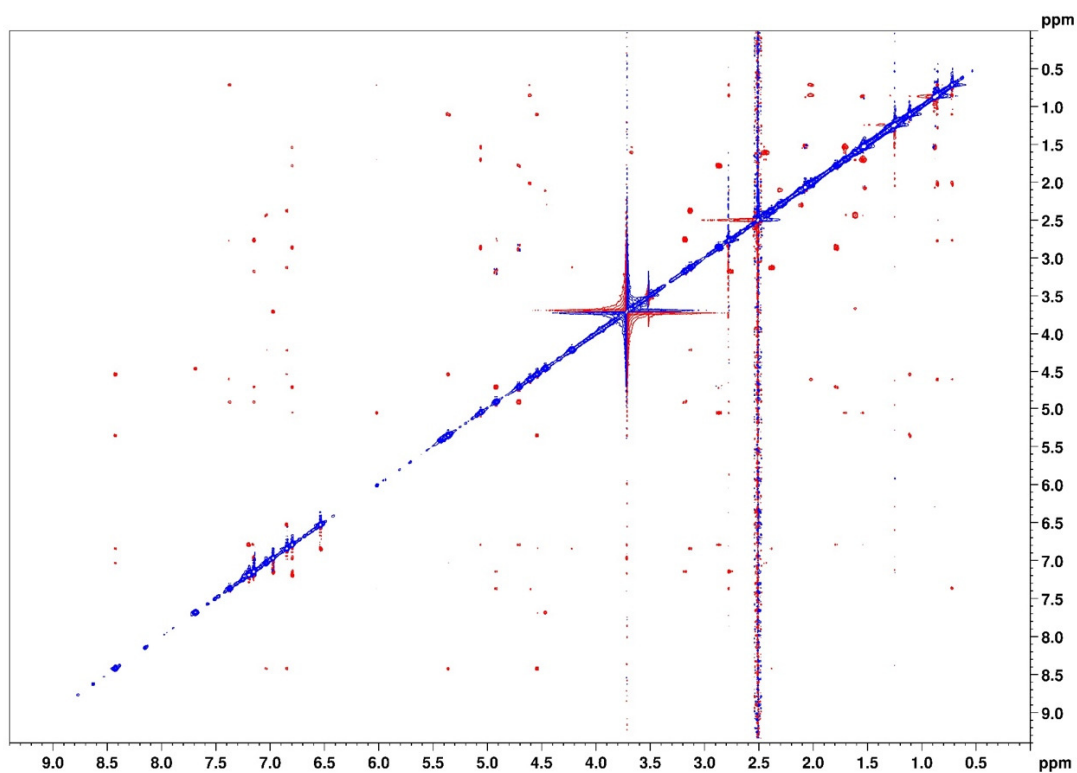

Figure S97. ROESY spectrum of cyanopeptolin CP 999 in DMSO-d<sub>6</sub>.

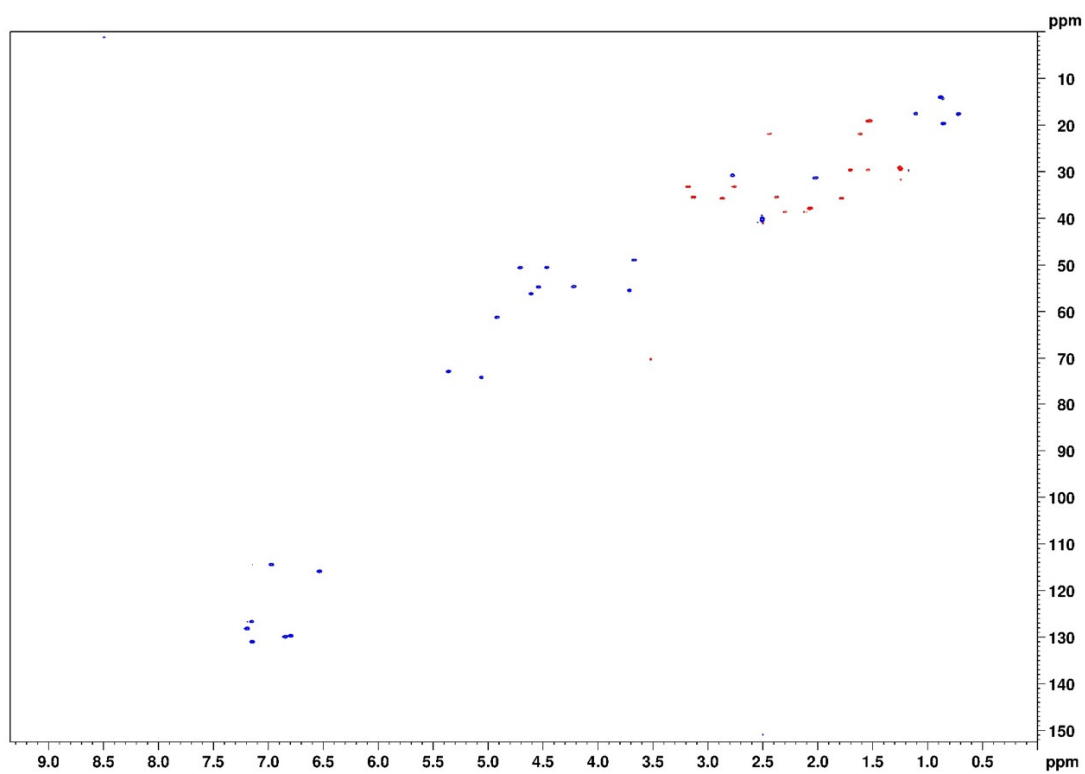

Figure S98. HSQC spectrum of cyanopeptolin CP 999 in DMSO-d<sub>6</sub>.

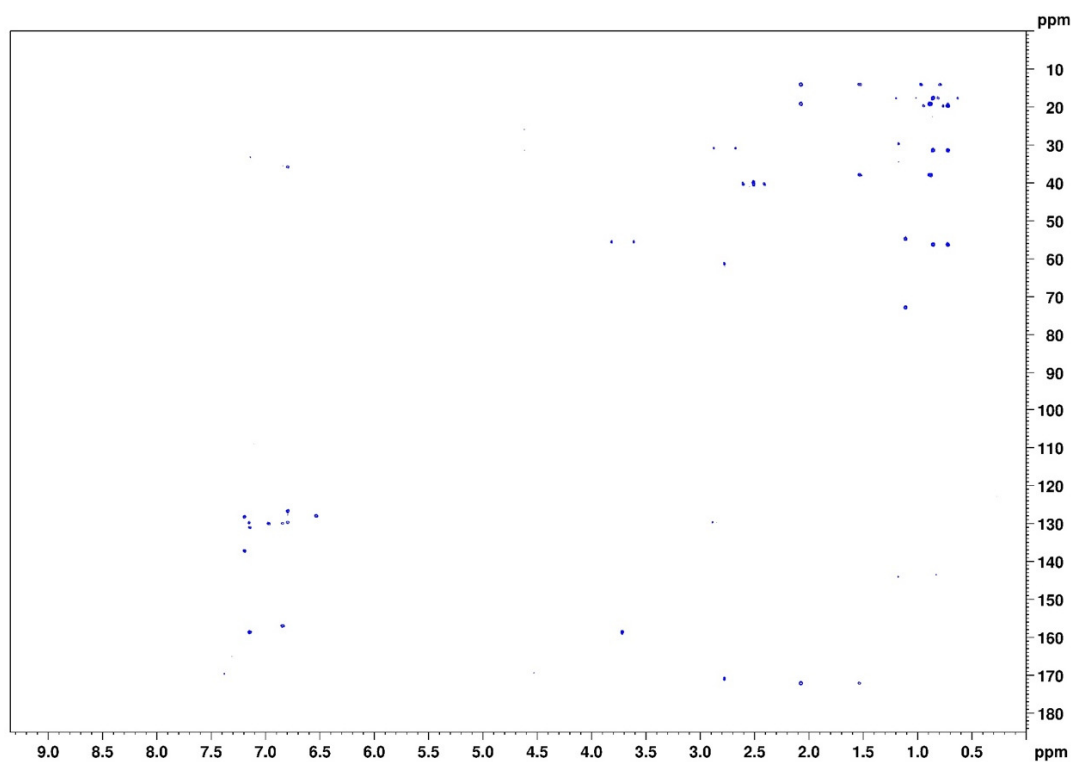

Figure S99. HMBC spectrum of cyanopeptolin CP 999 in DMSO-d<sub>6</sub>.

Table S6. NMR Spectroscopic Data for cyanopeptolin CP 990 – HA-Asp-[Thr-Arg-Ahp-Phe-MePhe-Val]

| Residue | Position         | $\delta_c$ | $\delta_H$ ( $J$ in Hz) | ROESY                                | HMBC <sup>a</sup>    |
|---------|------------------|------------|-------------------------|--------------------------------------|----------------------|
| HA      | 1                | 172.3      |                         |                                      |                      |
|         | 2                | 35.5       | 2.09, t (7.3)           |                                      | HA-1, HA-3, HA-4     |
|         | 3                | 25.5       | 1.50, m                 |                                      | HA-1, HA-4, HA-5     |
|         | 4                | 31.2       | 1.23, m                 |                                      |                      |
|         | 5                | 22.4       | 1.27, m                 |                                      | HA-4                 |
|         | 6                | 14.3       | 0.88 <sup>b</sup> , t   |                                      | HA-4, HA-5           |
| Asp     | 1                | <i>nd</i>  |                         |                                      |                      |
|         | 2                | 50.8       | 4.52, m                 |                                      |                      |
|         | 3a               | 39.9       | 2.53, m                 |                                      | Asp-2                |
|         | 3b               |            | 2.11, m                 |                                      |                      |
|         | 4                | <i>nd</i>  |                         |                                      |                      |
| Thr     | NH               |            | 8.00, d (8.1)           |                                      | HA-1                 |
|         | 1                | 169.9      |                         |                                      |                      |
|         | 2                | 55.0       | 4.58, d (9.0)           | Arg-NH                               | Thr-1                |
|         | 3                | 72.2       | 5.31, q (6.6)           | Arg-NH                               | Val-1                |
|         | 4                | 17.9       | 1.14, d (6.6)           |                                      | Thr-2, Thr-3         |
| Arg     | NH               |            | 7.23 <sup>c</sup> , d   |                                      |                      |
|         | 1                | 170.3      |                         |                                      |                      |
|         | 2                | 50.9       | 4.15, m                 |                                      |                      |
|         | 3a               | 26.4       | 1.88, m                 |                                      |                      |
|         | 3b               |            | 1.45, m                 |                                      |                      |
|         | 4a               | 24.6       | 1.47, m                 |                                      |                      |
|         | 4b               |            | 1.17, m                 |                                      |                      |
|         | 5a               | 39.7       | 2.95, m                 |                                      |                      |
|         | 5b               |            | 2.89, m                 |                                      |                      |
|         | 6                | <i>nd</i>  |                         | Thr-2, Thr-3                         | Thr-1                |
| Ahp     | NH               |            | 8.51, d (9.0)           |                                      |                      |
|         | 1                | <i>nd</i>  |                         |                                      |                      |
|         | 2                | 48.9       | 3.65, m                 |                                      |                      |
|         | 3a               | 21.9       | 2.42, m                 |                                      |                      |
|         | 3b               |            | 1.55, m                 |                                      |                      |
|         | 4a               | 29.6       | 1.69                    |                                      |                      |
|         | 4b               |            | 1.49, m                 | Phe-2'/6'                            |                      |
|         | 5                | 74.1       | 5.04                    | Phe-2'/6'                            |                      |
| Phe     | NH               |            | 6.96, d (9.5)           |                                      | Arg-1                |
|         | OH               |            | 6.01                    |                                      |                      |
|         | 1                | 170.7      |                         |                                      |                      |
|         | 2                | 50.6       | 4.74, dd (7.3, 4.4)     | Phe-2'/6', MePhe-2                   | Phe-1                |
|         | 3a               | 35.7       | 2.85, m                 | Phe-2'/6'                            | Phe-2'/6'            |
|         | 3b               |            | 1.69, m                 | Phe-2'/6'                            | Phe-2'/6'            |
|         | 1'               | 137.0      |                         |                                      |                      |
|         | 2'/6'            | 129.8      | 6.78, d (7.3)           | Ahp-4b, Ahp-5, Phe-2, Phe-3a, Phe-3b | Phe-3, Phe-4'        |
| MePhe   | 3'/5'            | 128.2      | 7.18, t (7.4)           |                                      | Phe-1'               |
|         | 4'               | 126.7      | 7.13, t (7.3)           |                                      | Phe-2'/6'            |
|         | 1                | 169.3      |                         |                                      |                      |
|         | 2                | 60.9       | 5.02                    | Phe-2, MePhe-2'/6', Val-NH           |                      |
|         | 3a               | 34.4       | 3.23, dd (11.7, 2.7)    | MePhe-2'/6'                          |                      |
|         | 3b               |            | 2.88, m                 | MePhe-2'/6'                          |                      |
|         | 1'               | 138.3      |                         |                                      |                      |
|         | 2'/6'            | 130.1      | 7.24 <sup>c</sup> , d   | MePhe-2, MePhe-3a, MePhe-3b          | MePhe-3, MePhe-4'    |
| Val     | 3'/5'            | 129.1      | 7.42 <sup>d</sup> , t   |                                      | MePhe-1'             |
|         | 4'               | 127.1      | 7.32, t (7.4)           |                                      | MePhe-2'/6'          |
|         | NCH <sub>3</sub> | 30.9       | 2.80, s                 |                                      | MePhe-2, Phe-1       |
|         | 1                | 172.6      |                         |                                      |                      |
|         | 2                | 56.3       | 4.71, dd (5.0, 4.3)     |                                      | Val-1                |
|         | 3                | 31.6       | 2.05, m                 |                                      |                      |
|         | 4                | 19.7       | 0.87 <sup>b</sup> , d   |                                      | Val-2, Val-3, Val-5, |
|         | 5                | 17.9       | 0.74, d (6.8)           |                                      | Thr-4                |
|         | NH               |            | 7.41 <sup>d</sup> , d   | MePhe-2                              | Val-2, Val-3, Val-4  |
|         |                  |            |                         |                                      | MePhe-1              |

<sup>a</sup> HMBC correlations are given from proton(s) stated to the indicated carbon atom; <sup>b-d</sup> assignments with the same superscript are overlapping; *nd* – resonances not detected

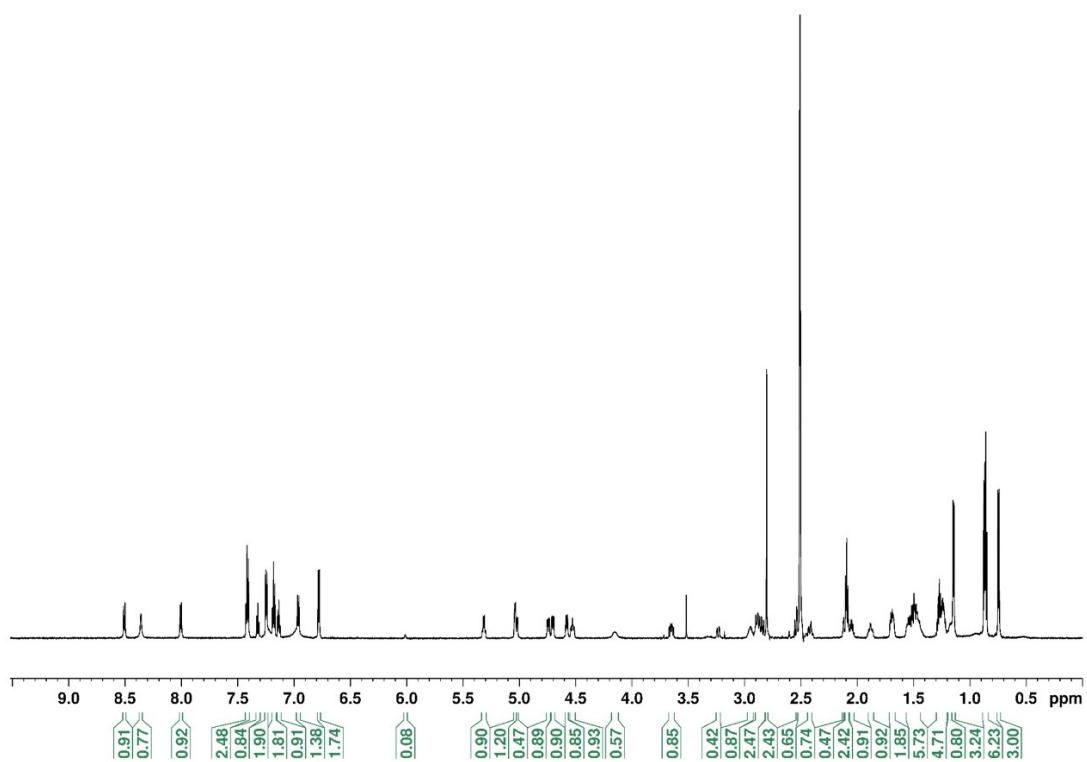

Figure S100.  $^1\text{H}$  NMR spectrum of cyanopeptolin CP 990 in  $\text{DMSO-d}_6$ .

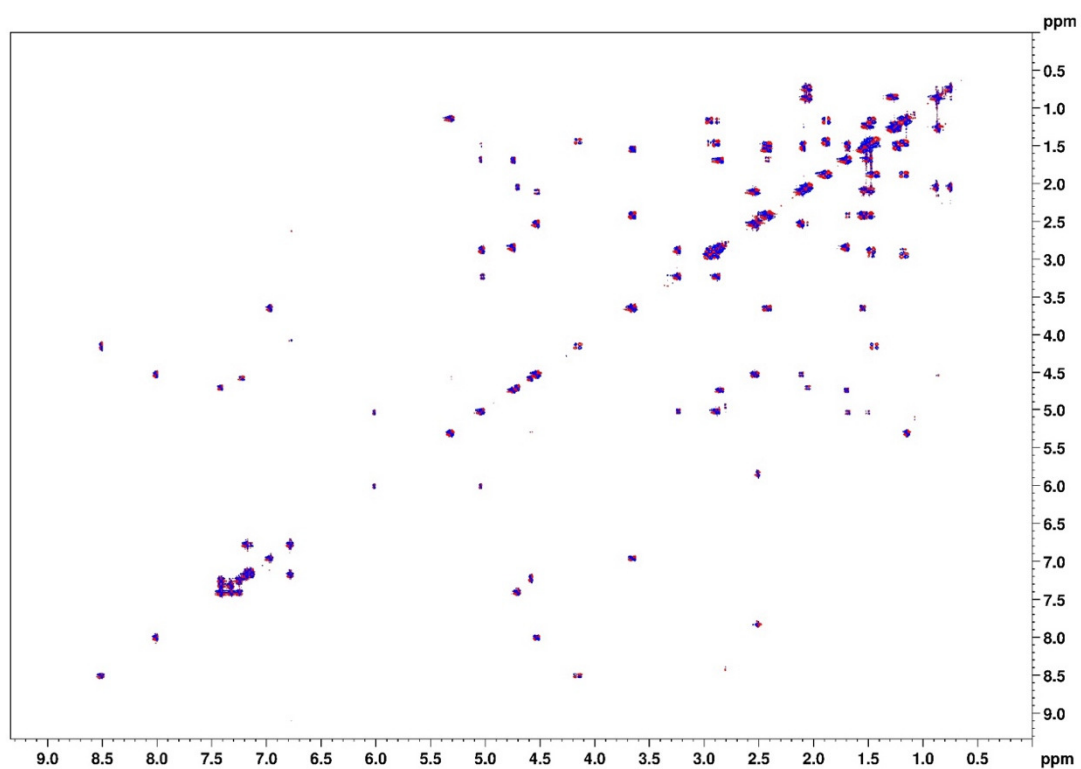

Figure S101. DQF-COSY spectrum of cyanopeptolin CP 990 in  $\text{DMSO-d}_6$ .



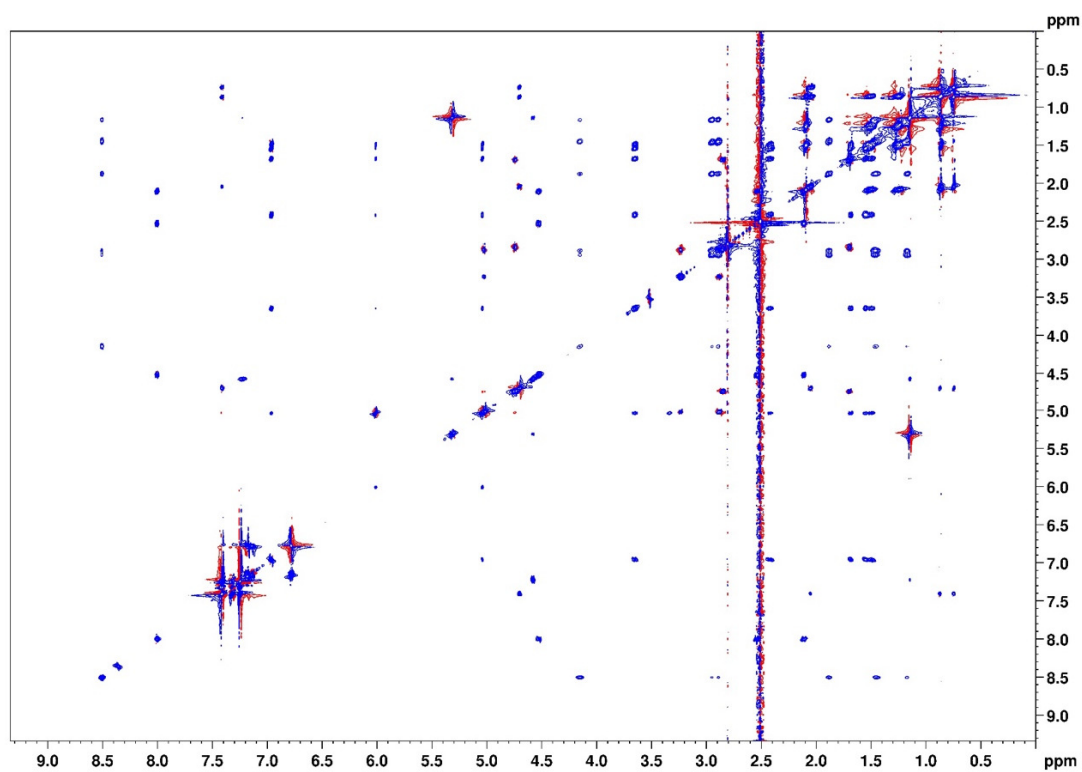

Figure S102. TOCSY spectrum of cyanopeptolin CP 990 in DMSO-d<sub>6</sub>.

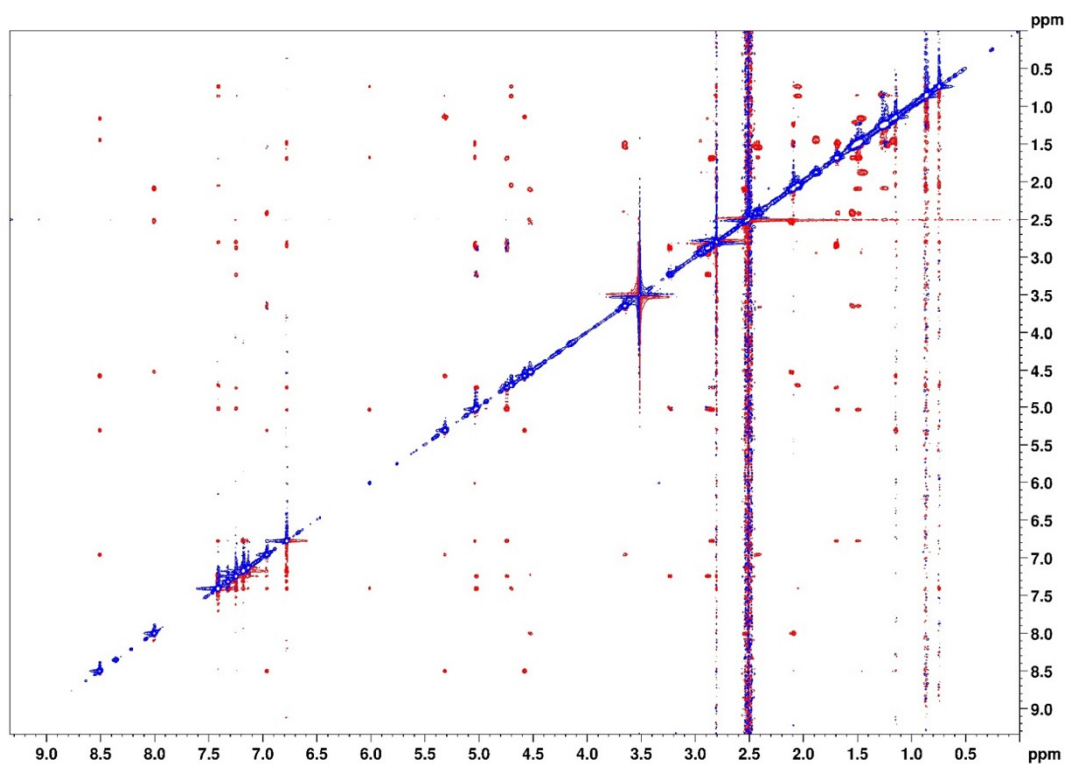

Figure S103. ROESY spectrum of cyanopeptolin CP 990 in DMSO-d<sub>6</sub>.

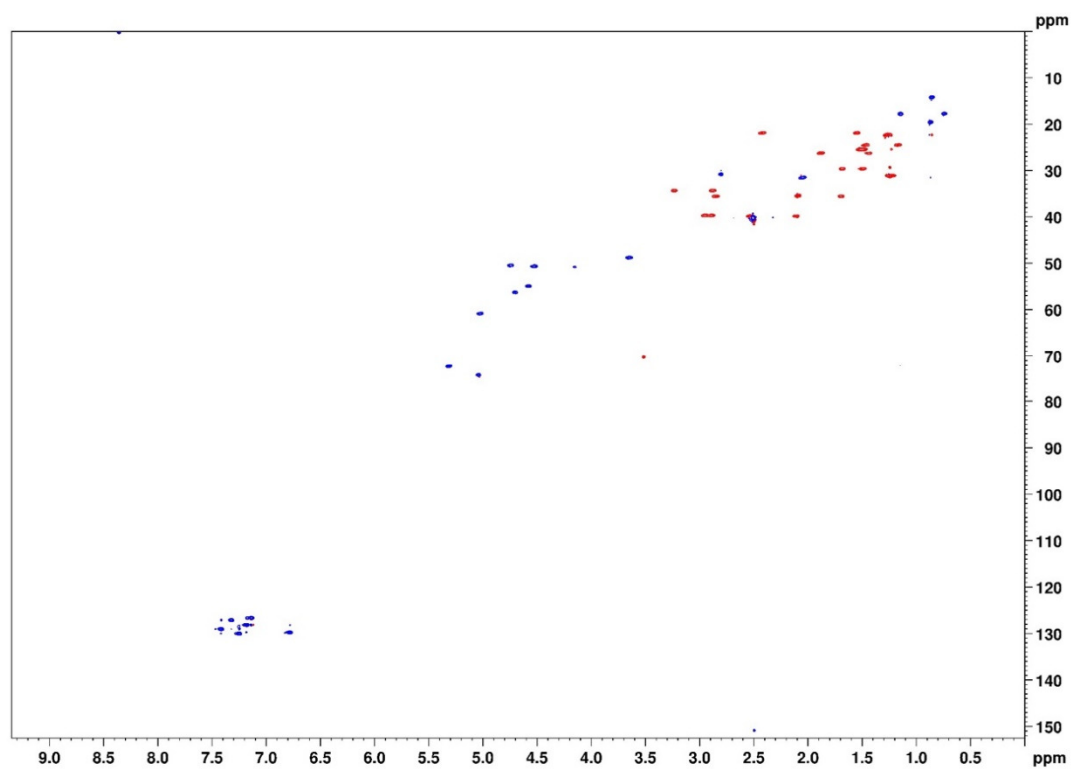

Figure S104. HSQC spectrum of cyanopeptolin CP 990 in DMSO-d<sub>6</sub>.

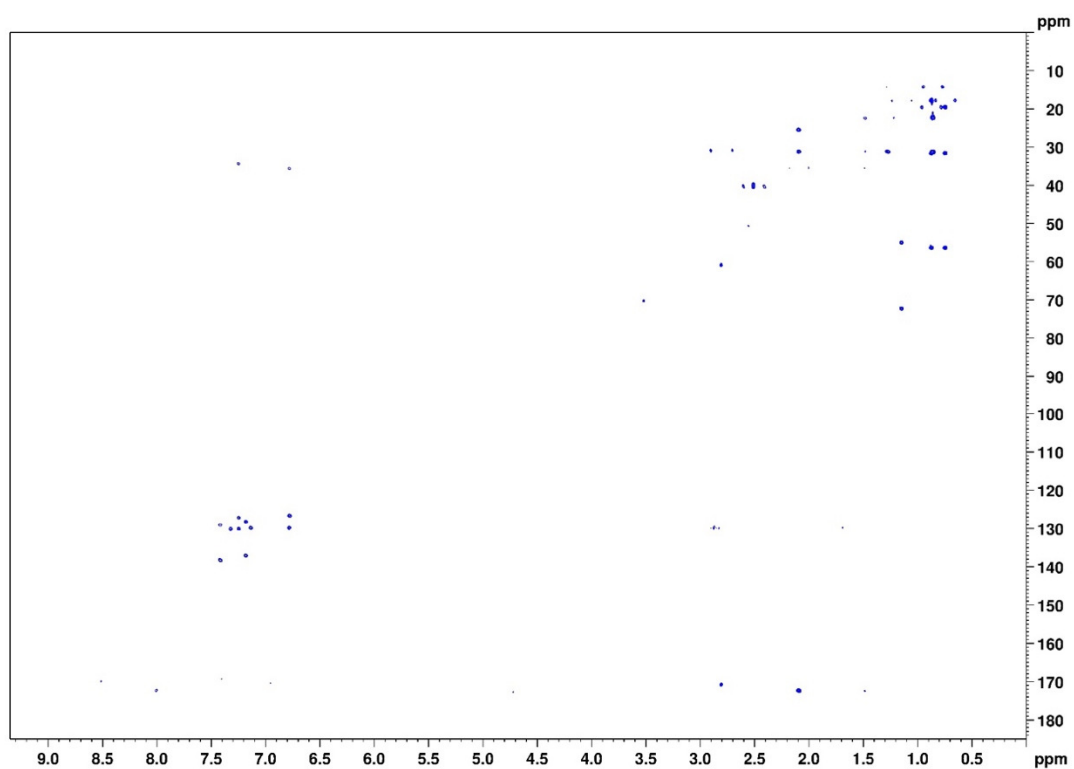

Figure S105. HMBC spectrum of cyanopeptolin CP 990 in DMSO-d<sub>6</sub>.

Table S7. NMR Spectroscopic Data for cyanopeptolin CP 983 – BA-Asp-[Thr-Phe-Ahp-Phe-MeTyr(OMe)-Val].

| Residue    | Position         | $\delta_c$               | $\delta_H$ (J in Hz)   | ROESY                                   | HMBC <sup>a</sup>   |
|------------|------------------|--------------------------|------------------------|-----------------------------------------|---------------------|
| BA         | 1                | 172.7                    |                        |                                         |                     |
|            | 2                | 37.8                     | 2.11, t (6.9)          | Asp-NH                                  | BA-1, BA-3, BA-4    |
|            | 3                | 19.2                     | 1.54 <sup>e</sup> , m  |                                         | BA-2, BA-4          |
|            | 4                | 14.1                     | 0.89, t (7.5)          |                                         | BA-2, BA-3          |
| Asp        | 1                | <i>nd</i>                |                        |                                         |                     |
|            | 2                | 50.2                     | 4.52, m                |                                         |                     |
|            | 3a               | <i>nd</i>                | 2.46, m                |                                         |                     |
|            | 3b               |                          | 2.36, m                |                                         |                     |
|            | 4                | <i>nd</i>                |                        |                                         |                     |
| Thr        | NH               |                          | 8.23, d (7.6)          | BA-2                                    |                     |
|            | 1                | <i>nd</i>                |                        |                                         |                     |
|            | 2                | 54.8                     | 4.48, m                | Phe4-NH                                 |                     |
|            | 3                | 72.6                     | 5.35, m                | Phe4-NH                                 |                     |
|            | 4                | 18.0                     | 1.13, d (6.7)          |                                         | Thr-2, Thr-3        |
| Phe4       | NH               |                          | 7.70, m                |                                         |                     |
|            | 1                | <i>nd</i>                |                        |                                         |                     |
|            | 2                | 53.9                     | 4.39, m                |                                         |                     |
|            | 3a               | 36.3                     | 3.25, m                | Phe4-2'/6'                              |                     |
|            | 3b               |                          | 2.62, m                | Phe4-2'/6'                              |                     |
|            | 1'               | 137.7/138.6 <sup>b</sup> |                        |                                         |                     |
|            | 2'/6'            | 126.6-131.0 <sup>c</sup> | 7.11-7.14 <sup>c</sup> | Phe4-3a, Phe4-3b                        |                     |
|            | 3'/5'            | 126.5/128.3 <sup>d</sup> | 7.17-7.19 <sup>d</sup> |                                         |                     |
|            | 4'               | 126.6-131.0 <sup>c</sup> | 7.11-7.14 <sup>c</sup> |                                         |                     |
|            | NH               |                          | 8.55, d (8.4)          | Thr-2, Thr-3                            |                     |
| Ahp        | 1                | <i>nd</i>                |                        |                                         |                     |
|            | 2                | 49.4                     | 3.64, m                |                                         |                     |
|            | 3a               | 21.9                     | 2.41, m                |                                         |                     |
|            | 3b               |                          | 1.64, m                |                                         |                     |
|            | 4a               | 29.7                     | 1.71, m                |                                         |                     |
|            | 4b               |                          | 1.56 <sup>e</sup> , m  | Phe6-2'/6'                              |                     |
|            | 5                | 74.2                     | 5.06, brs              | Phe6-3a, Phe6-2'/6'                     |                     |
|            | NH               |                          | 7.08, d (9.2)          |                                         |                     |
|            | OH               |                          | 6.02                   |                                         |                     |
|            |                  |                          |                        |                                         |                     |
| Phe6       | 1                | 170.8                    |                        |                                         |                     |
|            | 2                | 50.7                     | 4.70, m                | Phe6-2'/6'                              |                     |
|            | 3a               | 35.8                     | 2.87, m                | Ahp-5, Phe6-2'/6'                       |                     |
|            | 3b               |                          | 1.79, m                | Phe6-2'/6'                              |                     |
|            | 1'               | 137.7/138.6 <sup>b</sup> |                        |                                         |                     |
|            | 2'/6'            | 129.8                    | 6.79, d (7.1)          | Phe6-2, Phe6-3a, Phe6-3b, Ahp-4b, Ahp-5 |                     |
|            | 3'/5'            | 126.5/128.3 <sup>d</sup> | 7.17-7.19 <sup>d</sup> |                                         |                     |
|            | 4'               | 126.6-131.0 <sup>c</sup> | 7.11-7.14 <sup>c</sup> |                                         |                     |
| MeTyr(OMe) | 1                | <i>nd</i>                |                        |                                         |                     |
|            | 2                | 61.3                     | 4.92, m                | Val-NH                                  |                     |
|            | 3a               | 33.3                     | 3.17, m                |                                         |                     |
|            | 3b               |                          | 2.77, m                |                                         | MeTyr(OMe)-2        |
|            | 1'               | <i>nd</i>                |                        |                                         |                     |
|            | 2'/6'            | 126.6-131.0 <sup>c</sup> | 7.11-7.14 <sup>c</sup> | MeTyr(OMe)-3a, MeTyr(OMe)-3b            | MeTyr(OMe)-3        |
|            | 3'/5'            | 114.5                    | 6.96, d (8.6)          | MeTyr(OMe)-OCH <sub>3</sub>             |                     |
|            | 4'               | 158.6                    |                        |                                         |                     |
|            | OCH <sub>3</sub> | 55.5                     | 3.71, s                |                                         | MeTyr(OMe)-4'       |
|            | NCH <sub>3</sub> | 30.8                     | 2.78, s                | MeTyr(OMe)-3'/5'                        | Phe6-1              |
| Val        | 1                | <i>nd</i>                |                        |                                         |                     |
|            | 2                | 56.3                     | 4.63, m                |                                         |                     |
|            | 3                | 31.4                     | 2.03, m                |                                         |                     |
|            | 4                | 19.7                     | 0.86, d (6.9)          |                                         | Val-2, Val-3, Val-5 |
|            | 5                | 17.8                     | 0.72, d (6.9)          |                                         | Val-2, Val-3, Val-4 |
|            | NH               |                          | 7.42, d (9.4)          | MeTyr(OMe)-2                            |                     |

<sup>a</sup> HMBC correlations are given from proton(s) stated to the indicated carbon atom; <sup>c,d</sup> low amount of the sample made the unambiguous assignments of the aromatic signals impossible; <sup>e</sup> assignments are overlapping; *nd* – resonances not detected

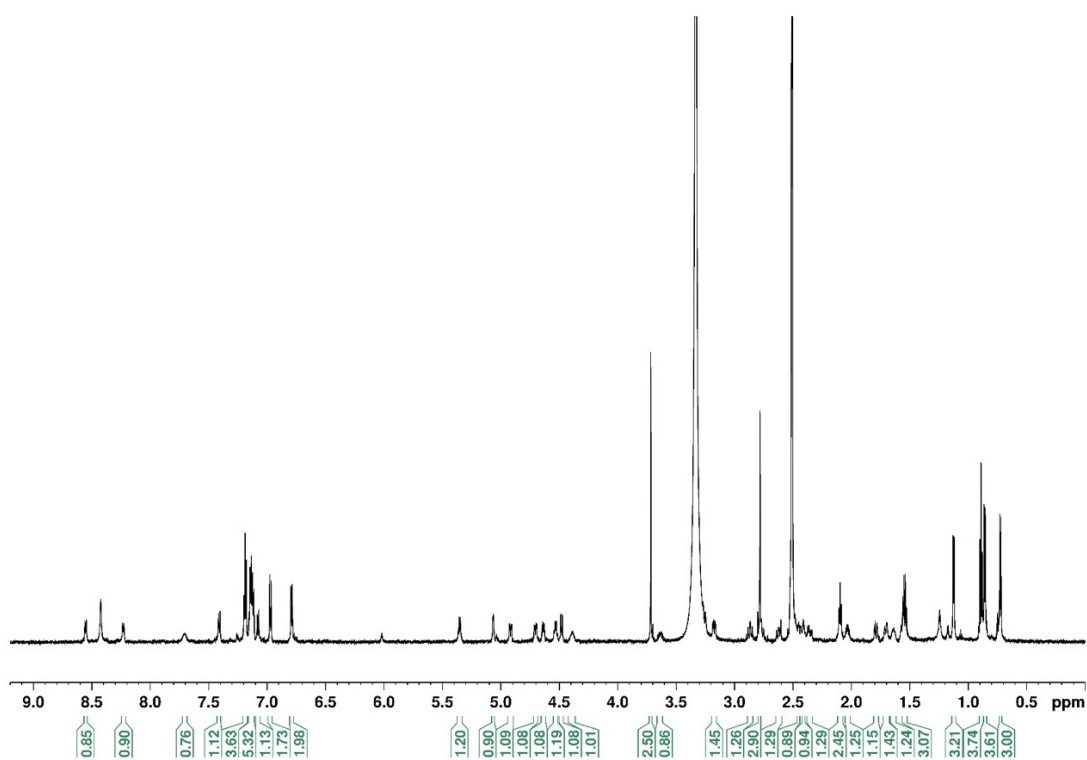

Figure S106.  $^1\text{H}$  NMR spectrum of cyanopeptolin CP 983 in  $\text{DMSO-d}_6$ .

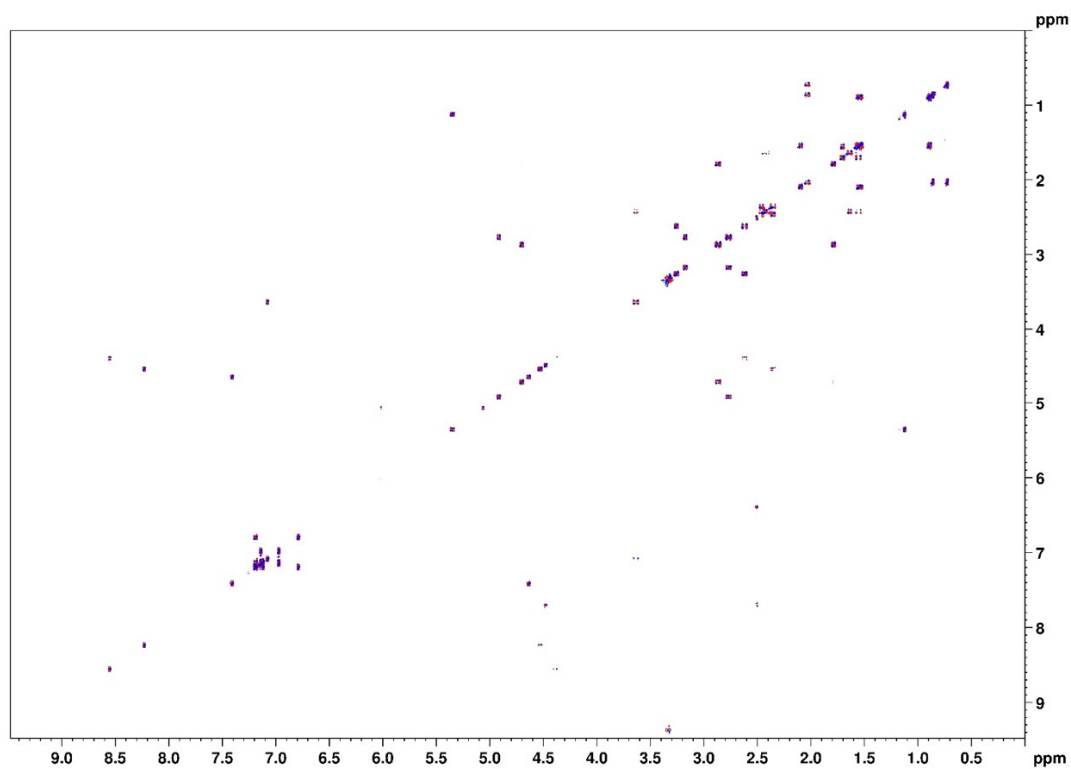

Figure S107. DQF-COSY spectrum of cyanopeptolin CP 983 in  $\text{DMSO-d}_6$ .

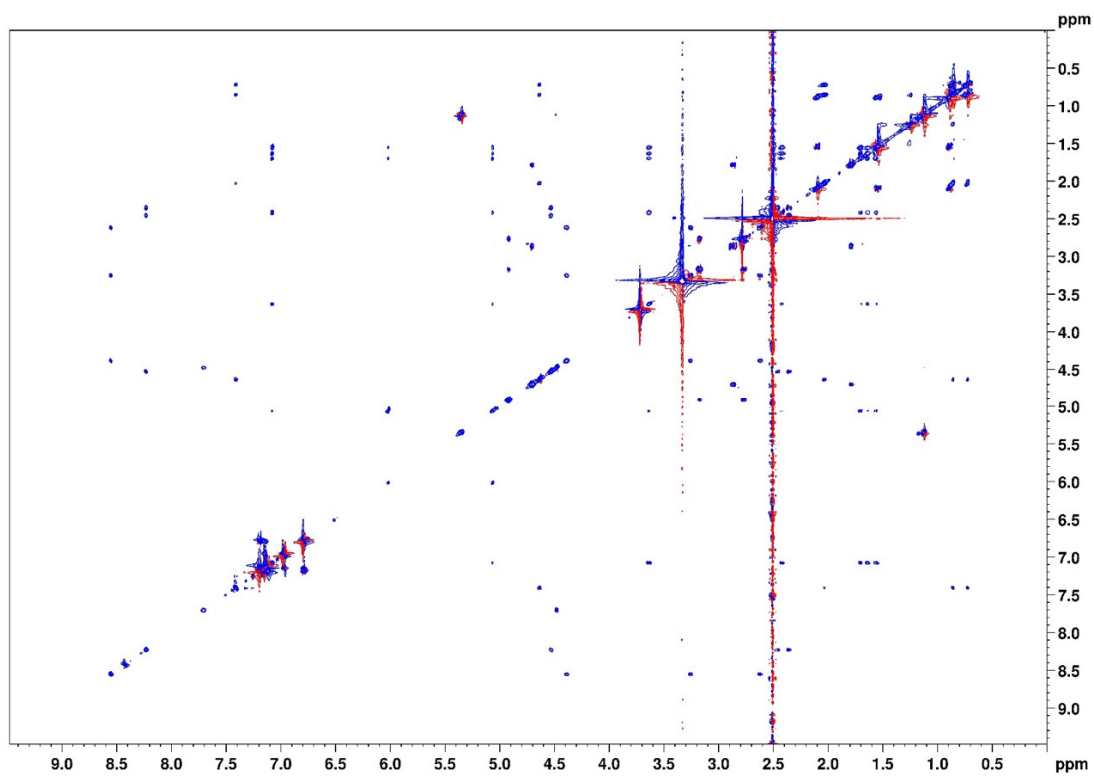

Figure S108. TOCSY spectrum of cyanopeptolin CP 983 in DMSO-d<sub>6</sub>.

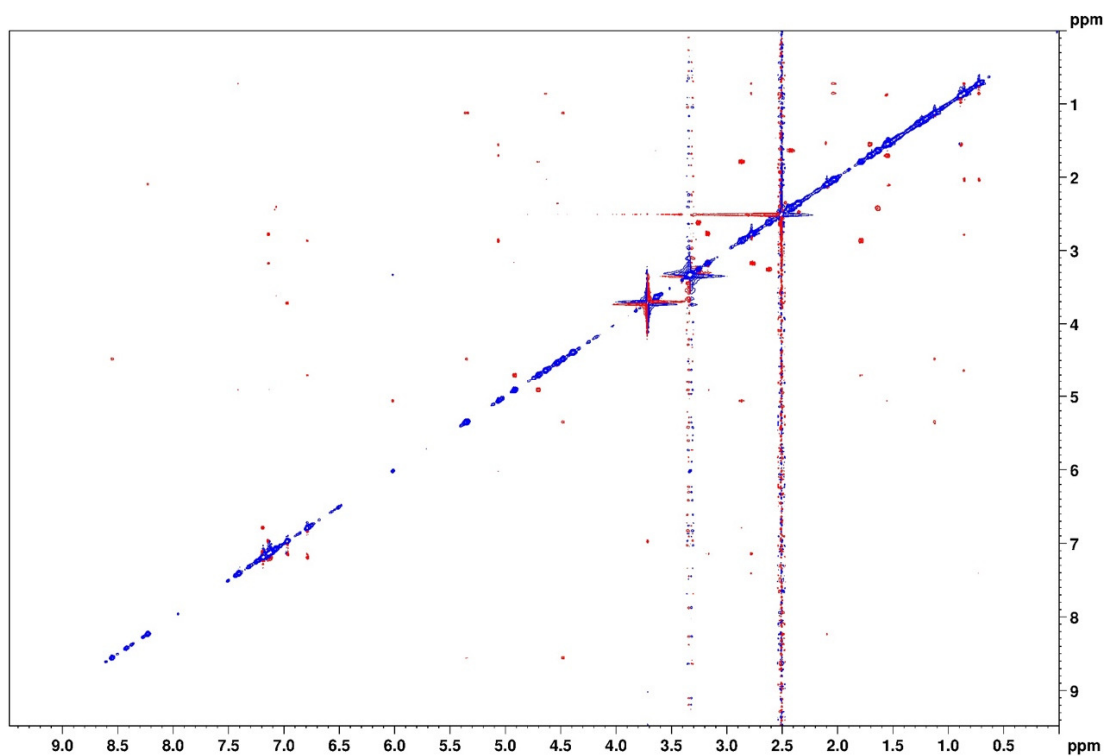

Figure S109. ROESY spectrum of cyanopeptolin CP 983 in DMSO-d<sub>6</sub>.

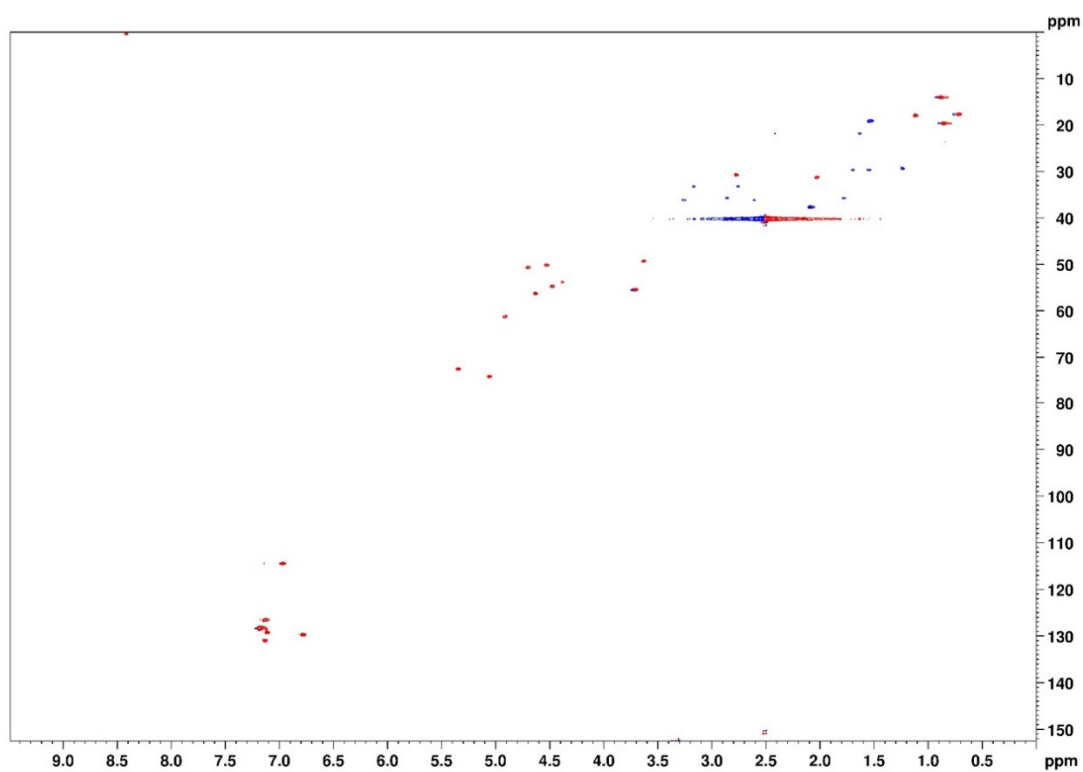

Figure S110. HSQC spectrum of cyanopeptolin CP 983 in DMSO-d<sub>6</sub>.

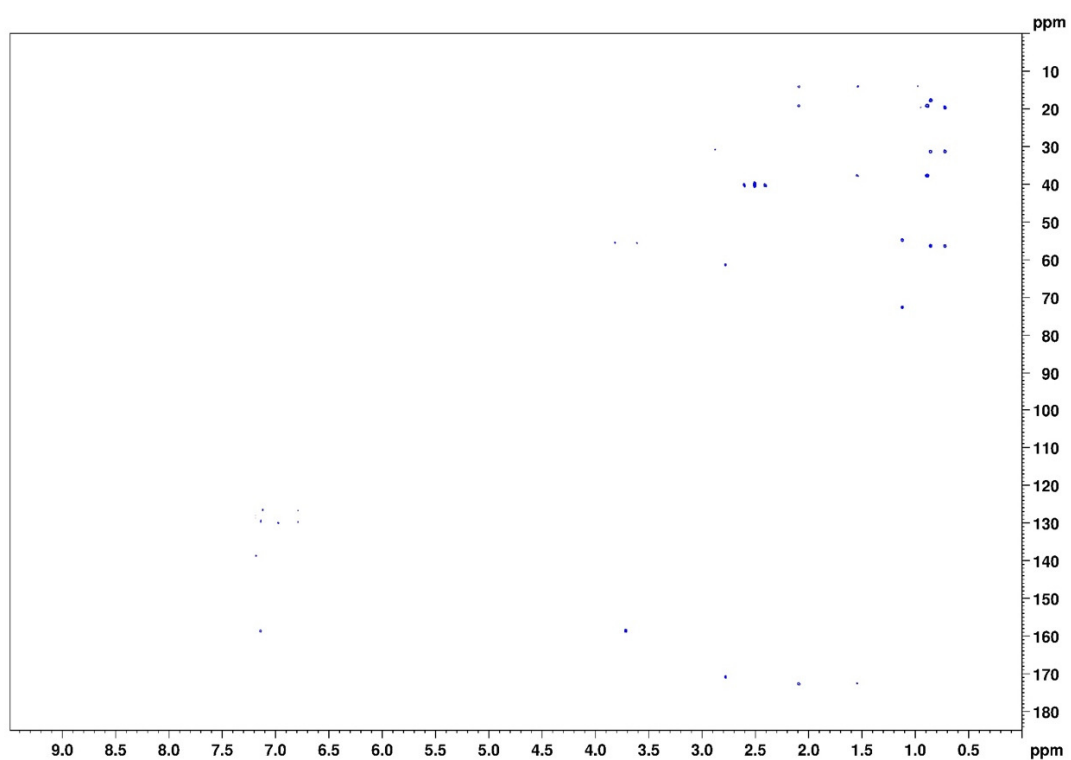

Figure S111. HMBC spectrum of cyanopeptolin CP 983 in DMSO-d<sub>6</sub>.

Table S8. NMR Spectroscopic Data for cyanopeptolin CP 949 – BA-Asp-[Thr-Leu-Ahp-Phe-MeTyr(OMe)-Val]

| Residue    | Position         | $\delta_C$ | $\delta_H$ | ROESY                        | HMBC <sup>a</sup>   |
|------------|------------------|------------|------------|------------------------------|---------------------|
| BA         | 1                | 172.8      |            |                              |                     |
|            | 2                | 37.7       | 2.11       |                              | BA-1                |
|            | 3                | 19.2       | 1.55       |                              | BA-1, BA-2          |
|            | 4                | 14.1       | 0.90       |                              | BA-2, BA-3          |
| Asp        | 1                | <i>nd</i>  |            |                              |                     |
|            | 2                | 50.1       | 4.64       | Thr-NH                       |                     |
|            | 3a               | 36.9       | 2.66       |                              |                     |
|            | 3b               |            | 2.45       |                              |                     |
|            | 4                | <i>nd</i>  |            |                              |                     |
| Thr        | NH               |            | 8.25       |                              |                     |
|            | 1                | <i>nd</i>  |            |                              |                     |
|            | 2                | 55.0       | 4.55       | Leu-NH                       |                     |
|            | 3                | 72.5       | 5.37       | Leu-NH                       |                     |
|            | 4                | 18.2       | 1.17       |                              |                     |
| Leu        | NH               |            | 7.71       | Asp-2                        |                     |
|            | 1                | <i>nd</i>  |            |                              |                     |
|            | 2                | 50.9       | 4.18       |                              |                     |
|            | 3a               | 39.5       | 1.71       |                              |                     |
|            | 3b               |            | 1.31       |                              |                     |
| Ahp        | 4                | 24.6       | 1.45       |                              |                     |
|            | 5                | 23.7       | 0.84       |                              | Leu-4               |
|            | 6                | 21.5       | 0.75       |                              |                     |
|            | NH               |            | 8.39       | Thr-2, Thr-3                 |                     |
|            | 1                | <i>nd</i>  |            |                              |                     |
|            | 2                | 49.1       | 3.63       |                              |                     |
|            | 3a               | 22.0       | 2.41       |                              |                     |
|            | 3b               |            | 1.58       |                              |                     |
|            | 4a               | 29.8       | 1.70       |                              |                     |
|            | 4b               |            | 1.52       |                              |                     |
| Phe        | 5                | 74.2       | 5.07       | Phe-3a                       |                     |
|            | NH               |            | 7.07       |                              |                     |
|            | OH               |            |            |                              |                     |
|            | 1                | 170.8      |            |                              |                     |
|            | 2                | 50.7       | 4.71       | Phe-2'/6'                    |                     |
|            | 3a               | 35.8       | 2.86       | Ahp-5, Phe-2'/6'             |                     |
|            | 3b               |            | 1.78       | Phe-2'/6'                    |                     |
|            | 1'               | <i>nd</i>  |            |                              |                     |
|            | 2'/6'            | 129.7      | 6.78       | Phe-2, Phe-3a, Phe-3b        |                     |
|            | 3'/5'            | 128.2      | 7.17       |                              |                     |
| MeTyr(OMe) | 4'               | 126.7      | 7.13       |                              |                     |
|            | 1                |            |            |                              |                     |
|            | 2                | 61.3       | 4.94       | Val-NH                       |                     |
|            | 3a               | 33.2       | 3.20       | MeTyr(OMe)-2'/6'             |                     |
|            | 3b               |            | 2.78       | MeTyr(OMe)-2'/6'             |                     |
|            | 1'               | <i>nd</i>  |            |                              |                     |
|            | 2'/6'            | 131.0      | 7.15       | MeTyr(OMe)-3a, MeTyr(OMe)-3b | MeTyr(OMe)-4'       |
|            | 3'/5'            | 114.5      | 6.98       | MeTyr(OMe)-OCH <sub>3</sub>  |                     |
|            | 4'               | 158.6      |            |                              |                     |
|            | OCH <sub>3</sub> | 55.6       | 3.72       | MeTyr(OMe)-3'/5'             | MeTyr(OMe)-4'       |
| Val        | NCH <sub>3</sub> | 30.8       | 2.78       |                              | Phe-1               |
|            | 1                | <i>nd</i>  |            |                              |                     |
|            | 2                | 56.3       | 4.67       |                              |                     |
|            | 3                | 31.3       | 2.05       |                              |                     |
|            | 4                | 19.7       | 0.88       |                              | Val-2, Val-3, Val-5 |
|            | 5                | 17.8       | 0.74       |                              | Val-2, Val-3, Val-4 |
|            | NH               |            | 7.43       | MeTyr(OMe)-2                 |                     |

<sup>a</sup> HMBC correlations are given from proton(s) stated to the indicated carbon atom; *nd* – resonances not detected

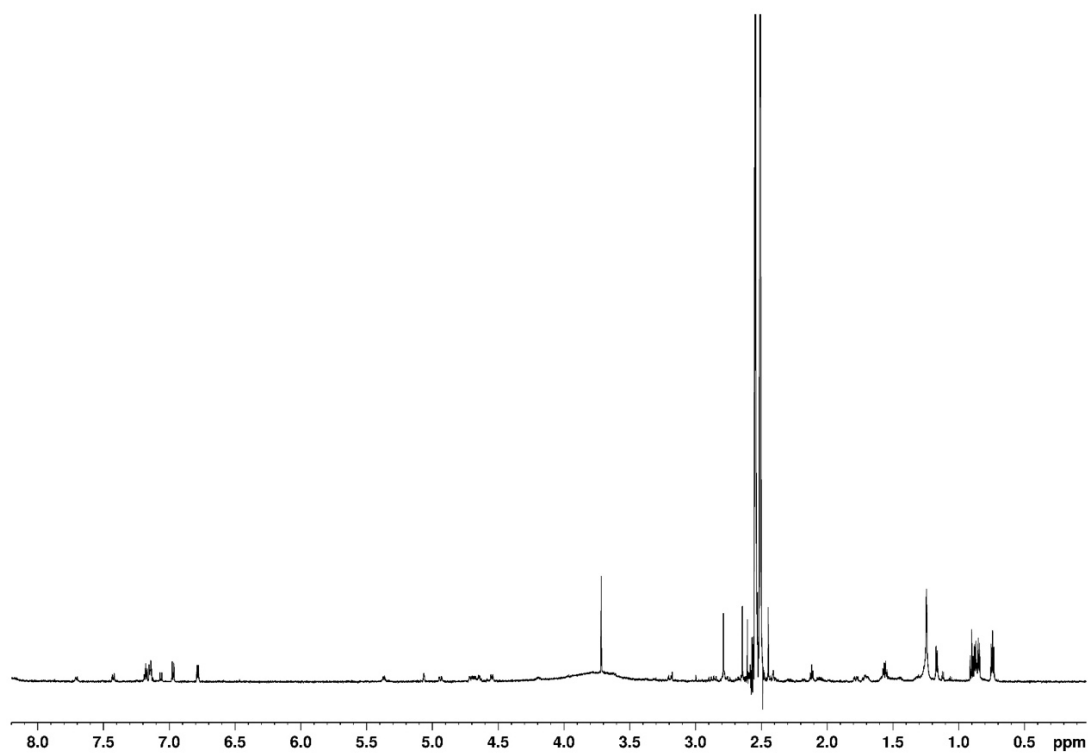

Figure S112.  $^1\text{H}$  NMR spectrum of cyanopeptolin CP 949 in  $\text{DMSO-d}_6$ .

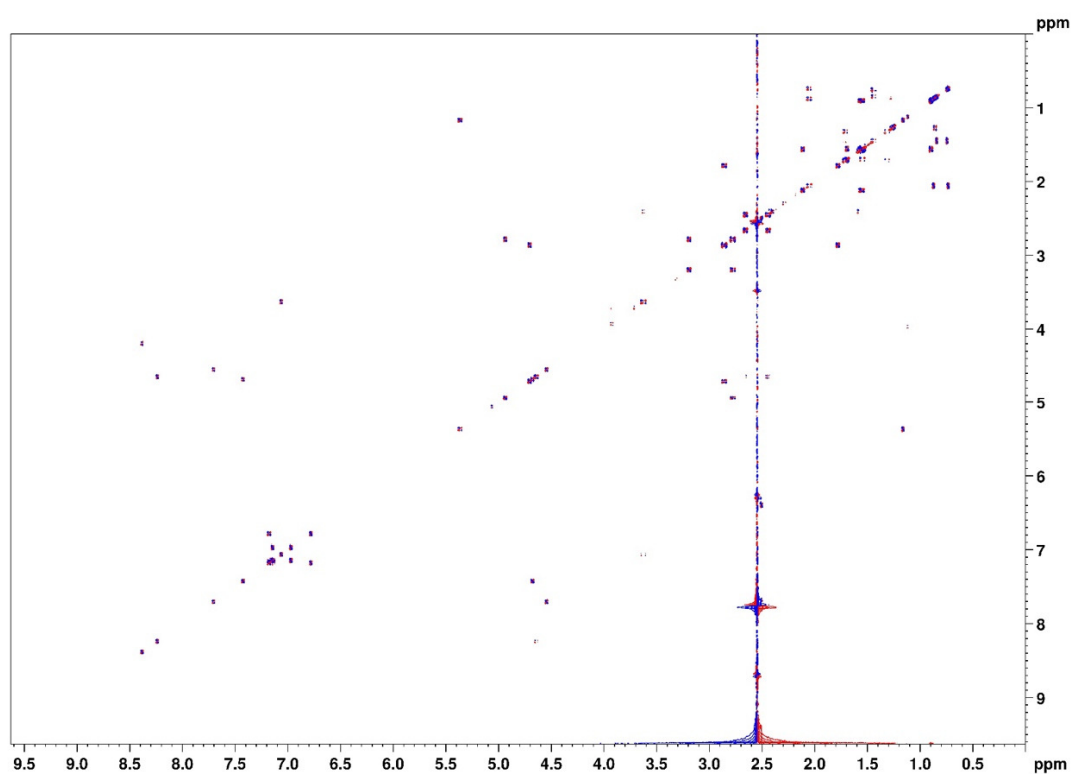

Figure S113. DQF-COSY spectrum of cyanopeptolin CP 949 in  $\text{DMSO-d}_6$ .



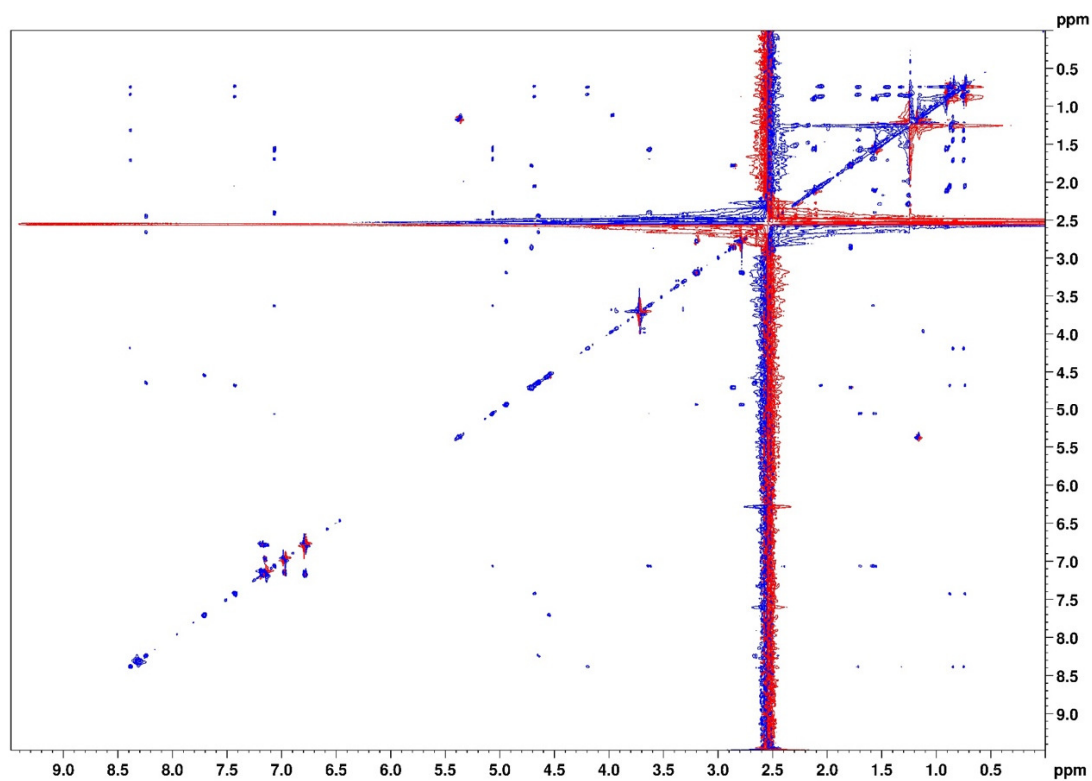

Figure S114. TOCSY spectrum of cyanopeptolin CP 949 in DMSO-d<sub>6</sub>.

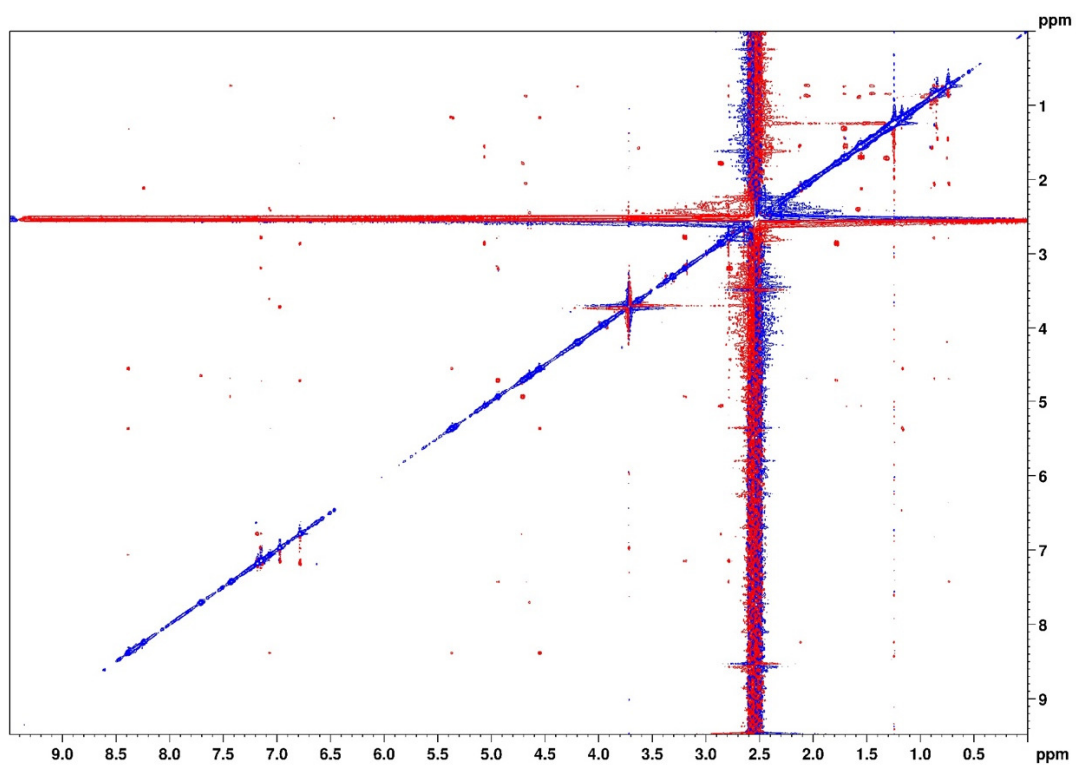

Figure S115. ROESY spectrum of cyanopeptolin CP 949 in DMSO-d<sub>6</sub>.

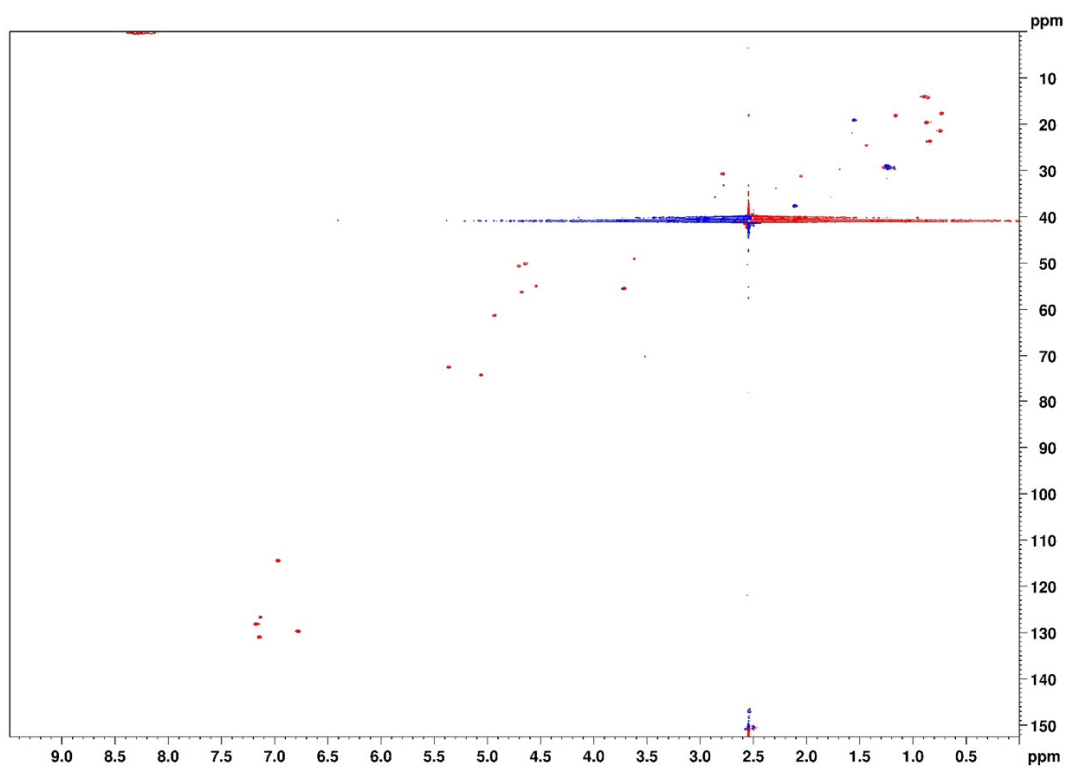

Figure S116. HSQC spectrum of cyanopectolin CP 949 in DMSO-d<sub>6</sub>.

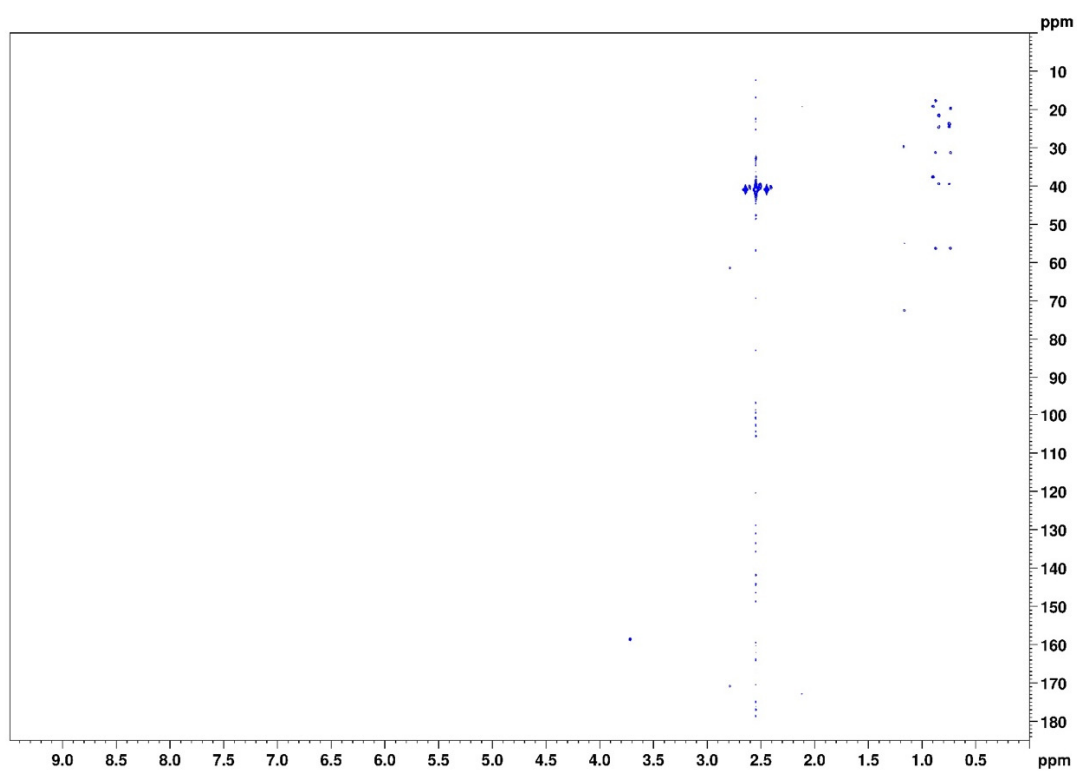

Figure S117. HMBC spectrum of cyanopectolin CP 949 in DMSO-d<sub>6</sub>.

Table S9. NMR Spectroscopic Data for cyanopeptolin CP 919 – BA-Asp-[Thr-Leu-Ahp-Phe-MePhe-Val].

| Residue | Position         | $\delta_c$ | $\delta_H$ (J in Hz)  | ROESY                      | HMBC <sup>a</sup>     |
|---------|------------------|------------|-----------------------|----------------------------|-----------------------|
| BA      | 1                | 172.2      |                       |                            |                       |
|         | 2                | 37.9       | 2.11, t (7.2)         | Asp-NH                     | BA-1, BA-3, BA-4      |
|         | 3                | 19.4       | 1.54, q (7.3)         |                            | BA-1, BA-2, BA-4      |
|         | 4                | 14.1       | 0.89 <sup>b</sup> , t |                            | BA-2, BA-3            |
| Asp     | 1                | <i>nd</i>  |                       |                            |                       |
|         | 2                | 50.6       | 4.58, m               |                            |                       |
|         | 3a               | 40.9       | 2.35, m               |                            |                       |
|         | 3b               |            | 2.27, m               |                            |                       |
|         | 4                | <i>nd</i>  |                       |                            |                       |
| Thr     | NH               |            | 8.19, m               | BA-2                       |                       |
|         | 1                | <i>nd</i>  |                       |                            |                       |
|         | 2                | 55.1       | 4.53, d (8.7)         | Leu-NH                     |                       |
|         | 3                | 72.7       | 5.36, m               | Leu-NH                     |                       |
|         | 4                | 18.4       | 1.19, d (6.5)         |                            | Thr-2, Thr-3          |
| Leu     | NH               |            | <i>nd</i>             |                            |                       |
|         | 1                | <i>nd</i>  |                       |                            |                       |
|         | 2                | 51.1       | 4.16, m               |                            |                       |
|         | 3a               | 39.3       | 1.71 <sup>c</sup> , m |                            |                       |
|         | 3b               |            | 1.35, m               |                            |                       |
|         | 4                | 24.6       | 1.45, m               |                            |                       |
|         | 5                | 23.8       | 0.84, d (6.7)         |                            | Leu-6                 |
|         | 6                | 21.5       | 0.75 <sup>d</sup> , d |                            | Leu-5                 |
| Ahp     | NH               |            | 8.40, m               | Thr-2, Thr-3               |                       |
|         | 1                | <i>nd</i>  |                       |                            |                       |
|         | 2                | 49.1       | 3.62, m               |                            |                       |
|         | 3a               | 22.3       | 2.39, m               |                            |                       |
|         | 3b               |            | 1.56, m               |                            |                       |
|         | 4a               | 29.5       | 1.69, m               |                            |                       |
|         | 4b               |            | 1.51, m               |                            |                       |
|         | 5                | 74.1       | 5.04 <sup>e</sup> , m |                            |                       |
|         | NH               |            | 7.07, d (9.4)         |                            |                       |
|         | OH               |            | 6.09                  |                            |                       |
| Phe     | 1                | 170.9      |                       |                            |                       |
|         | 2                | 50.3       | 4.75, m               | MePhe-2                    |                       |
|         | 3a               | 35.8       | 2.84 <sup>f</sup> , m | Phe-2'/6'                  |                       |
|         | 3b               |            | 1.71 <sup>c</sup> , m | Phe-2'/6'                  |                       |
|         | 1'               | 137.2      |                       |                            |                       |
|         | 2'/6'            | 129.8      | 6.78, d (6.9)         | Phe-3a, Phe-3b             | Phe-3, Phe-4'         |
|         | 3'/5'            | 128.2      | 7.18, t (7.3)         |                            | Phe-1'                |
|         | 4'               | 126.8      | 7.14, t (7.2)         |                            | Phe-2'/6'             |
| MePhe   | 1                | <i>nd</i>  |                       |                            |                       |
|         | 2                | 61.1       | 5.03 <sup>e</sup> , m | Phe-2, MePhe-2'/6', NH-Val |                       |
|         | 3a               | 34.0       | 3.35, m               |                            |                       |
|         | 3b               |            | 2.84 <sup>f</sup> , m |                            |                       |
|         | 1'               | 138.4      |                       |                            |                       |
|         | 2'/6'            | 130.0      | 7.26, d (7.5)         | MePhe-2                    | MePhe-3, MePhe-4'     |
|         | 3'/5'            | 129.1      | 7.41, t (7.5)         |                            | MePhe-1', MePhe-2'/6' |
|         | 4'               | 127.2      | 7.31, t (7.3)         |                            | MePhe-2'/6'           |
| Val     | NCH <sub>3</sub> | 30.8       | 2.81, s               |                            | MePhe-2, Phe-1        |
|         | 1                | <i>nd</i>  |                       |                            |                       |
|         | 2                | 56.5       | 4.66, m               |                            |                       |
|         | 3                | 31.2       | 2.06, m               |                            |                       |
|         | 4                | 19.9       | 0.89 <sup>b</sup> , d |                            | Val-2, Val-3, Val-5   |
|         | 5                | 18.0       | 0.76 <sup>d</sup> , d |                            | Val-2, Val-3, Val-4   |
|         | NH               |            | 7.52, d (9.4)         | MePhe-2                    |                       |

<sup>a</sup> HMBC correlations are given from proton(s) stated to the indicated carbon atom; <sup>b-g</sup> assignments with the same superscript are overlapping; *nd* – resonances not detected

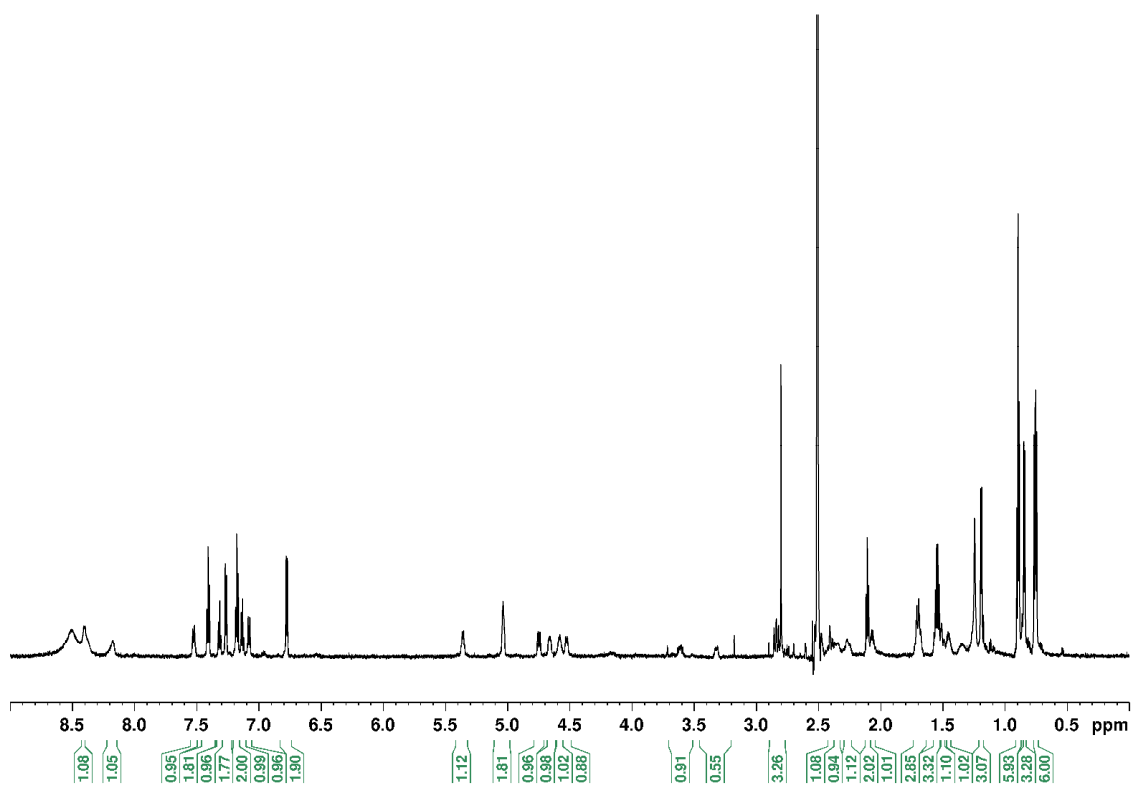

Figure S118. <sup>1</sup>H NMR spectrum of cyanopeptolin CP 919 in DMSO-d<sub>6</sub>.

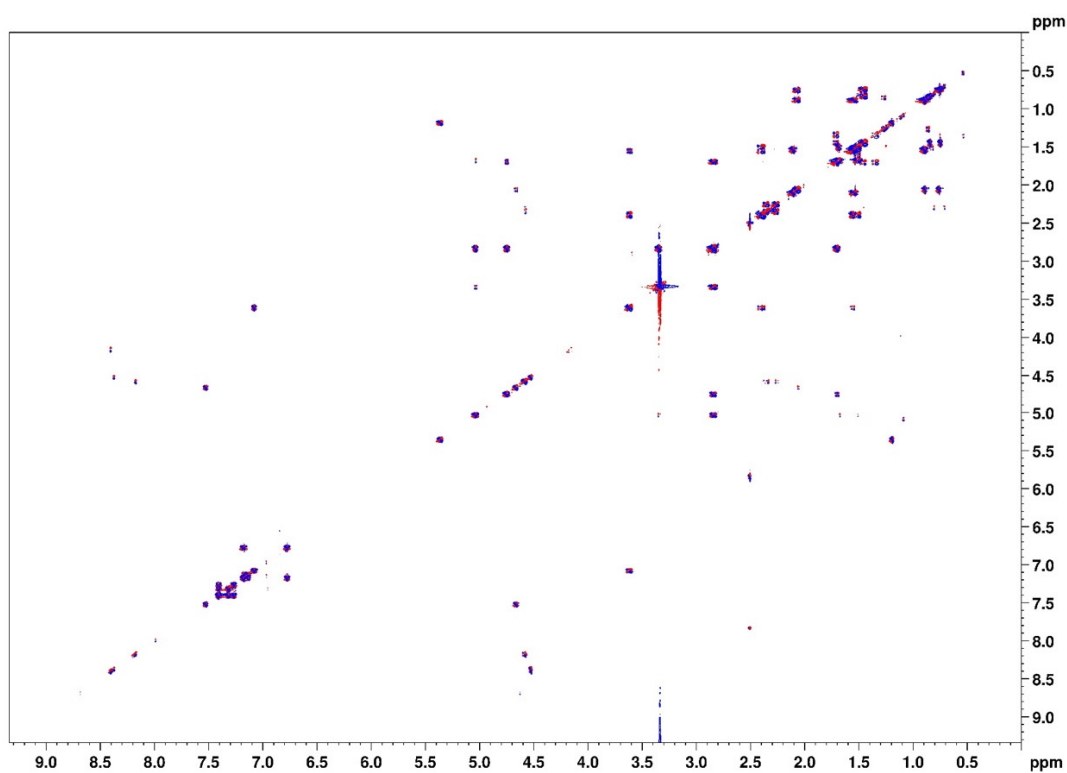

Figure S119. DQF-COSY spectrum of cyanopeptolin CP 919 in DMSO-d<sub>6</sub>.

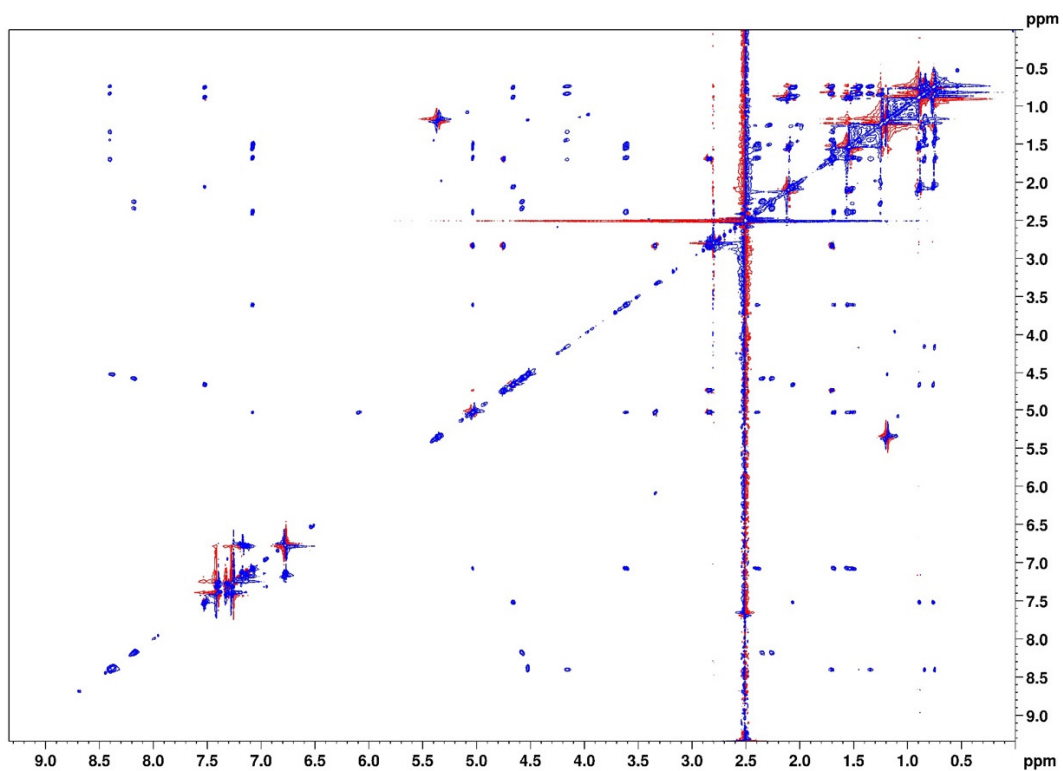

Figure S120. TOCSY spectrum of cyanopeptolin CP 919 in DMSO-d<sub>6</sub>.

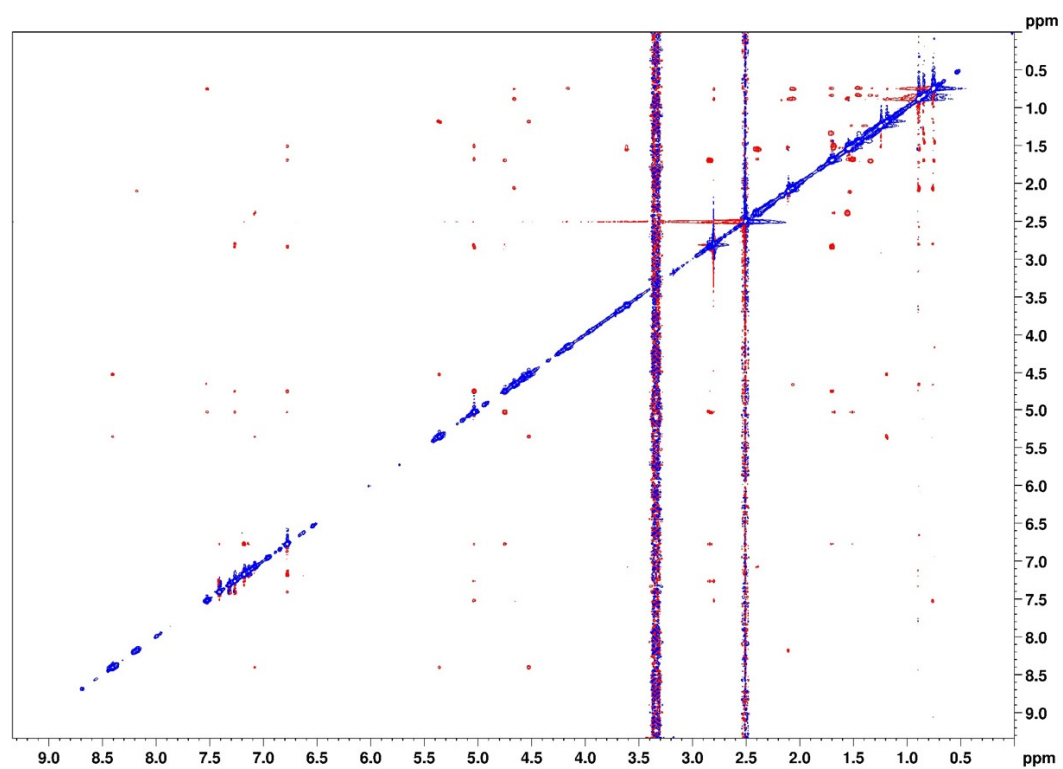

Figure S121. ROESY spectrum of cyanopeptolin CP 919 in DMSO-d<sub>6</sub>.

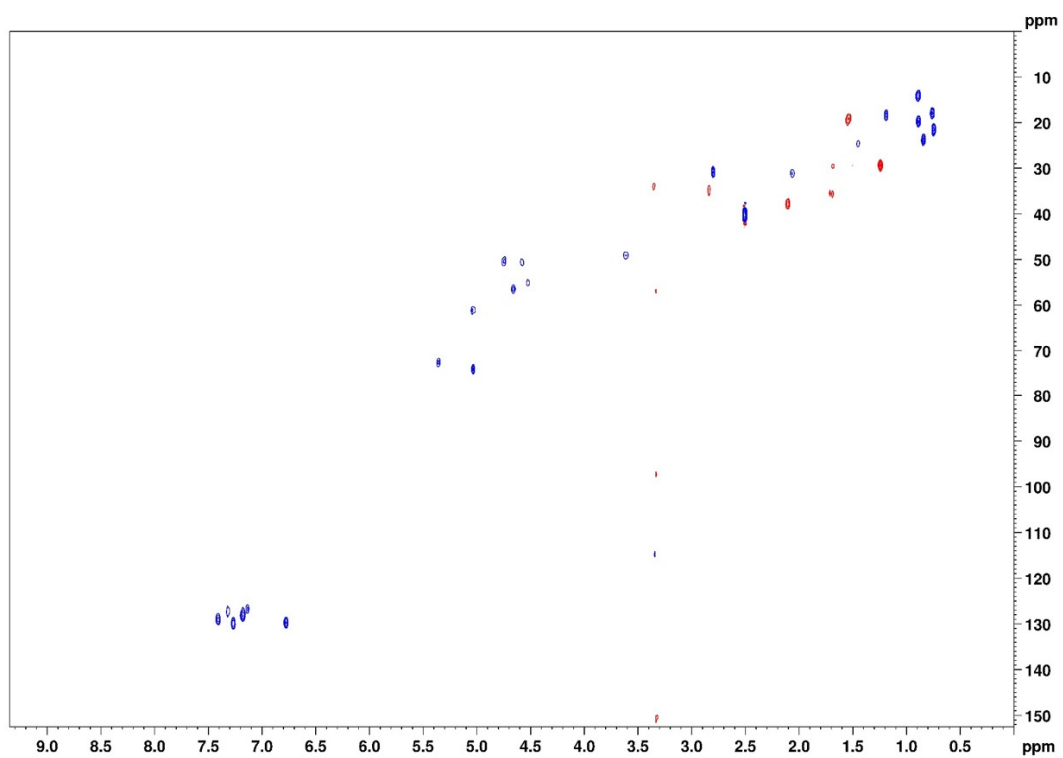

Figure S122. HSQC spectrum of cyanopeptolin CP 919 in DMSO-d<sub>6</sub>.

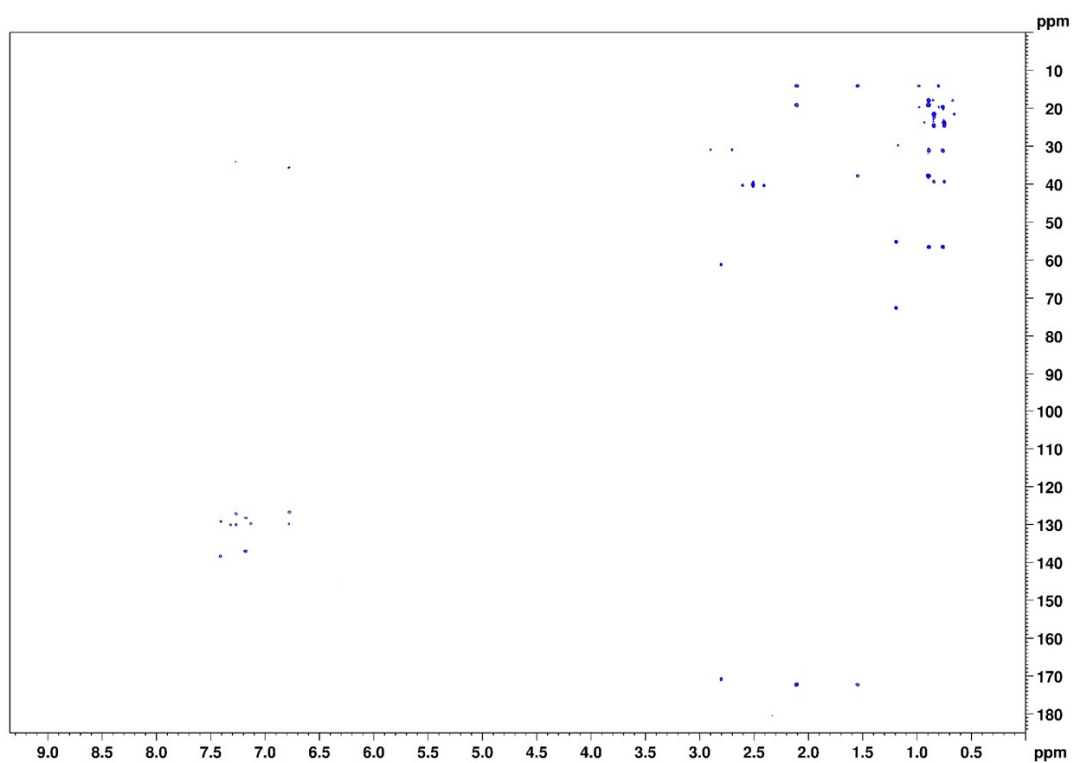

Figure S123. HMBC spectrum of cyanopeptolin CP 919 in DMSO-d<sub>6</sub>.

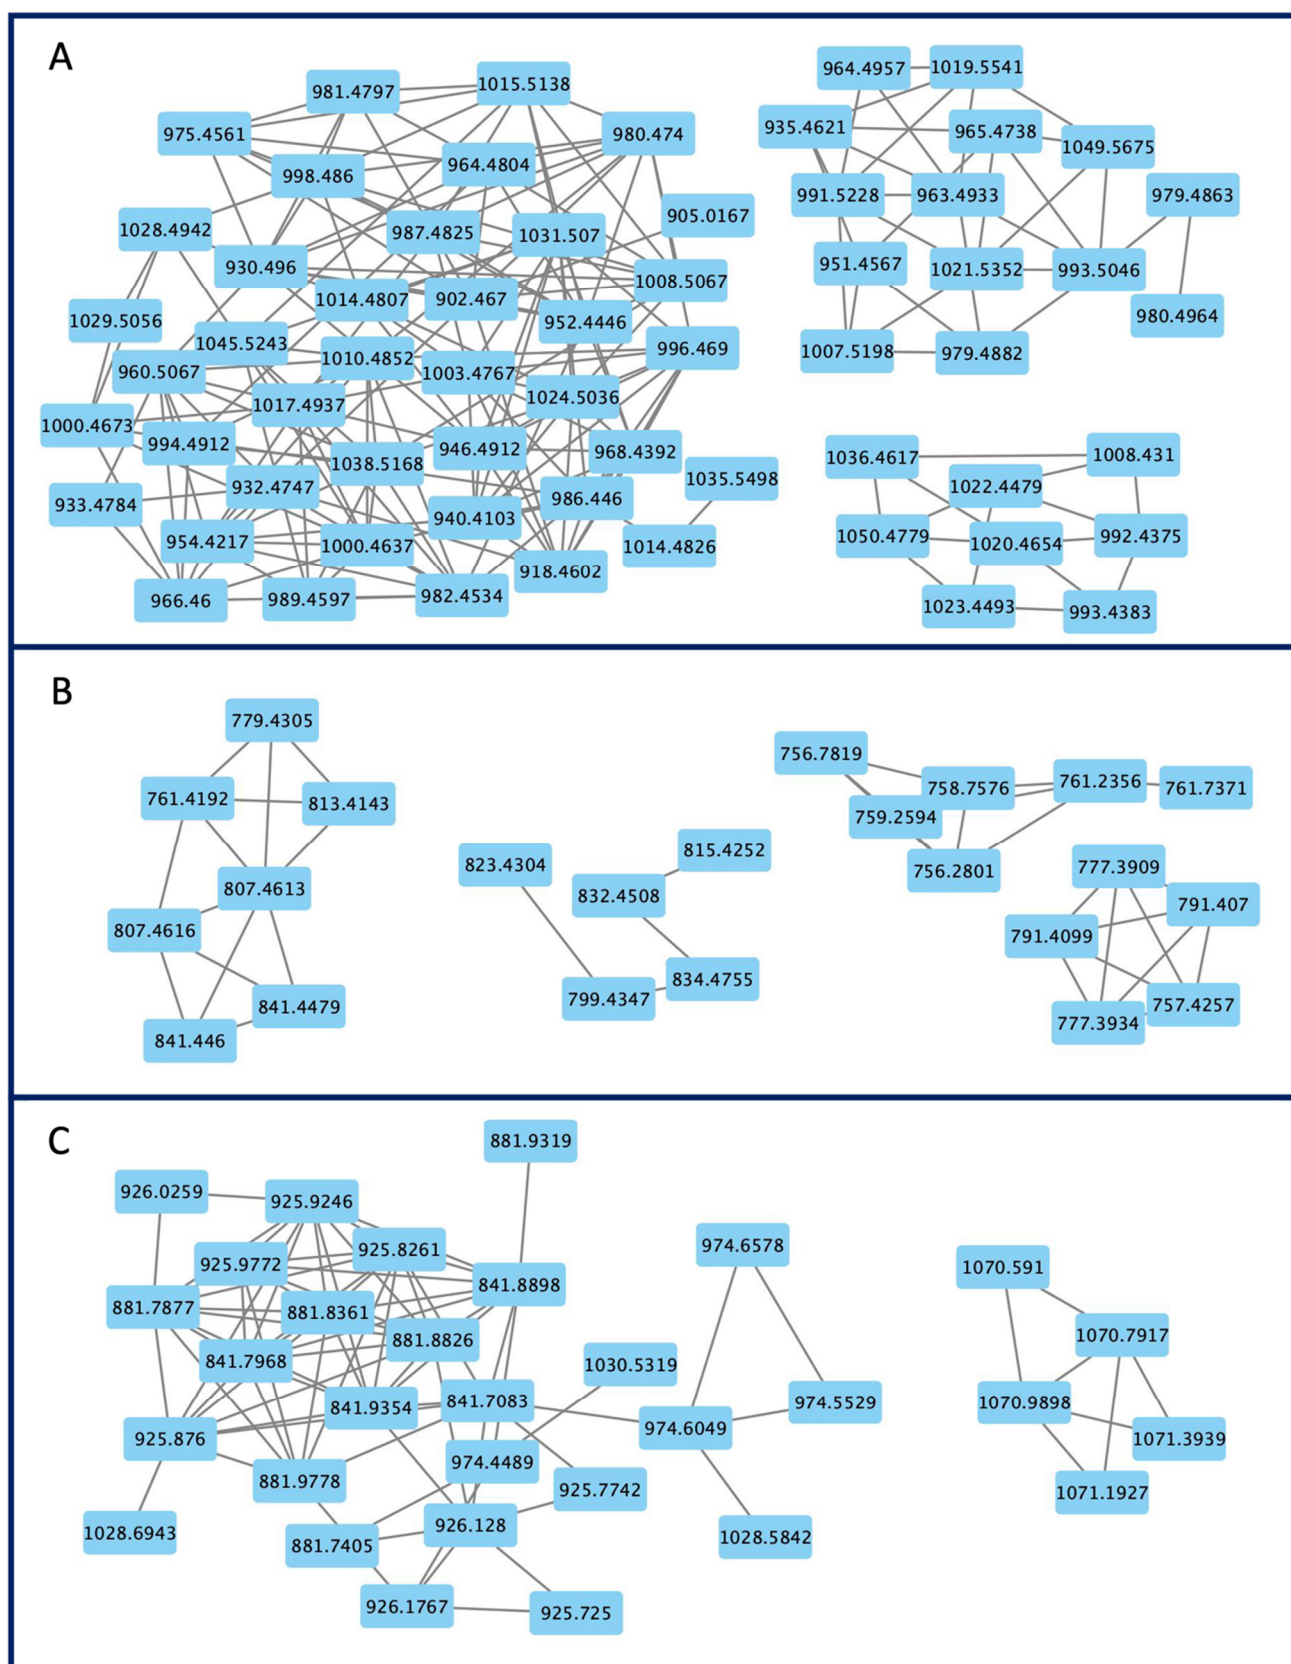

Figure S124. A CCNP1411 clusters formed by the GNPS analysis based on the HRMS/MS fragmentation spectra obtain from *Nostoc edaphicum* CCNP1411 extract. Clusters are separate as: A – nodes containing CPs features; B – nodes containing Nostocyclopeptides features C – nodes containing unknow features.
